# Supplementary material
Source: publisher figshare collection journal article supplement (https://tandf.figshare.com/ndownloader/files/20449683)
Supplement: Supplementary file 1 [file 20449683]

**A comprehensive, genus-level time-calibrated phylogeny of the tree flora of Mediterranean Europe and an assessment of its vulnerability**

Marwan Cheikh Albassatneh et al.

**Appendix S1.** List of genera native to Mediterranean Europe, their presence in Mediterranean Asia and Africa, and their endemism.

**Appendix S2.** Barcoding regions and molecular protocols.

**Appendix S3.** Fasta files for all consensus sequences at genus level for the organelle genes matK, rbcL and trnH-psbA.

**Appendix S4.** Number of individual and species sequences used to create consensus DNA sequences at genus level. Species used for each genus and sequence references are also shown, one table per gene (Appendix S4-1 to S4-3).

**Appendix S5.** Life history trait data related to mating and seed dispersal.

**Appendix S6.** Categorical IUCN vulnerability statute (IUCN Red List accessed 30/03/2019)

**Appendix S7.** Phylogram obtained from Bayesian inference analysis of the matK, rbcL and trnH-psbA sequence data of the 64 tree genera of Mediterranean Europe. Numbers indicate posterior probability support for each node when > 0.90. Red lines indicate discrepancies with the APG IV phylogeny.

**Appendix S8.** Non-dated Maximum Likelihood phylogenetic tree of 64 woody plant genera of Mediterranean Europe. Numbers indicate Bayesian support for each node. Orange lines indicate discrepancy or incongruence with the APG IV phylogeny**.**

**Appendix S9**. Differences in statistical support for nodes between the Maximum Likelihood and Bayesian approaches.

**Appendix S10.** Divergence age estimates. Node labels are the ones of Fig. 1.

**Appendix S11.** Results of the tests of phylogenetic signal for the IUCN conservation status using Fritz and Purvis’ (2010) D statistic

**Appendix S1.** List of genera native to Mediterranean Europe, their presence in Mediterranean Asia and Africa, and their endemism (defined as occurring only in the Mediterranean basin).

| **Genus** | **In Mediterranean Asia** | **In Mediterranean Africa** | **Strict Mediterranean endemic** |
| --- | --- | --- | --- |
| *Abies* | Yes | Yes | No |
| *Acer* | Yes | Yes | No |
| *Aesculus* | Yes | No | No |
| *Alnus* | Yes | Yes | No |
| *Arbutus* | Yes | Yes | No |
| *Betula* | Yes | Yes | No |
| *Buxus* | Yes | Yes | No |
| *Carpinus* | Yes | No | No |
| *Castanea* | Yes | No | No |
| *Cedrus* | Yes | Yes | No |
| *Celtis* | Yes | Yes | No |
| *Ceratonia* | Yes | Yes | No |
| *Cercis* | Yes | No | No |
| *Chamaerops* | No | Yes | Yes |
| *Corylus* | Yes | No | No |
| *Cotinus* | Yes | Yes | No |
| *Cotoneaster* | Yes | Yes | No |
| *Crataegus* | Yes | Yes | No |
| *Cupressus* | Yes | Yes | No |
| *Cytisus* | Yes | Yes | No |
| *Erica* | Yes | Yes | No |
| *Fagus* | Yes | No | No |
| *Ficus* | Yes | Yes | No |
| *Fontanesia* | Yes | No | No |
| *Frangula* | Yes | Yes | No |
| *Fraxinus* | Yes | Yes | No |
| *Genista* | Yes | Yes | No |
| *Ilex* | Yes | Yes | No |
| *Juglans* | Yes | No | No |
| *Juniperus* | Yes | Yes | No |
| *Laurus* | Yes | Yes | No |
| *Liquidambar* | Yes | No | No |
| *Lonicera* | Yes | Yes | No |
| *Malus* | Yes | Yes | No |
| *Myrica* | No | No | No |
| *Myrtus* | Yes | Yes | No |
| *Nerium* | Yes | Yes | No |
| *Olea* | Yes | Yes | No |
| *Ostrya* | Yes | No | No |
| *Phillyrea* | Yes | Yes | Yes |
| *Phoenix* | Yes | Yes | No |
| *Pinus* | Yes | Yes | No |
| *Pistacia* | Yes | Yes | No |
| *Platanus* | Yes | No | No |
| *Populus* | Yes | Yes | No |
| *Prunus* | Yes | Yes | No |
| *Pyrus* | Yes | Yes | No |
| *Quercus* | Yes | Yes | No |
| *Rhamnus* | Yes | Yes | No |
| *Rhododendron* | Yes | No | No |
| *Salix* | Yes | Yes | No |
| *Sambucus* | Yes | Yes | No |
| *Searsia* | No | Yes | No |
| *Sorbus* | Yes | Yes | No |
| *Spartium* | Yes | Yes | Yes |
| *Staphylea* | Yes | No | No |
| *Styrax* | Yes | No | No |
| *Tamarix* | Yes | Yes | No |
| *Taxus* | Yes | Yes | No |
| *Tetraclinis* | No | Yes | Yes |
| *Tilia* | Yes | No | No |
| *Ulmus* | Yes | Yes | No |
| *Vitex* | Yes | Yes | No |
| *Zelkova* | Yes | No | No |
| Total presence | 60 | 57 | 4 |

**Appendix S2.** Protocols used for generating genus-level sequence data at three organelle DNA barcoding regions.

We generated sequence data from three organelle DNA barcoding regions: *matK*, *rbcL*, and *trnH-psbA*, to infer phylogenetic relationships among the 64 target genera (Appendix S1). The molecular data sets were gathered from threes sources:

- National Center for Biotechnology Information (NCBI): The database was searched in June 2018. The number of sequences obtained from this source ranged from a minimum of one to 14 per species. When all European Mediterranean species belonging to the genus of interest where present in the database, they were used to generate a genus-level consensus sequence for each of the three DNA regions as specified in the text. When sequence data were not available from NCBI, they were generated *de novo* using the resources of INRA-URFM and IBBR-CNR or using non-Mediterranean species (see below).

- Herbarium tissue available at the sample repository of INRA-URFM, in Avignon (France). This herbarium contains many of the species listed in Médail et al. (2019). The number of sequenced individuals per species ranged one to 31. Samples were sequenced using the method of Sanger et al. (1977). DNA was extracted from leaf tissue using the DNeasy 96 Plant Kit (QIAGEN, Germany) at the INRA molecular biology laboratory of Avignon, France. Primers for *matK* and *rbcL* were obtained from Kress and Erickson (2007) and those for *trnH-psbA* from Kress et al., (2005). Polymerase chain reactions (PCR) were performed according to the following conditions: denaturation at 95 °C for 5 min, followed by 35 cycles at 94 °C for 30 sec, 48 ° (*matK* and *rbcL*) or C or 53 °C (*trnH-psbA*) for 30 sec and 72 °C for 45 sec with a final 10 min extension step at 72 °C. PCR final volume was optimized to 30 μl and the PCR mix contained: 0.2 mM of each dNTP, 2.5 mM of MgCl2, 0.3 μM of each primers, 1X GoTaq® Flexi Buffer, 1.25 U of GoTaq® DNA Polymerase (Promega, USA) and 2 μl of 15 ng⁄μl DNA. PCR products were quality-checked on 1.5% agarose gel stained with Ethidium Bromide (EtBr) and successfully amplified samples were sent to the French Genomics Institute Genoscope (Evry, France).

- National Research Council (IBBR-CNR) of Florence, Italy: The sequences that were not available at the INRA-URFM repository were searched in the repositories of the Woodiv partners (see Acknowledgments) or in the wild. Sanger sequencing on the available samples was performed at the Institute of Biosciences and BioResources, National Research Council (IBBR-CNR) of Florence, Italy. PCR amplifications were carried out in an optimized final volume of 14 μl and the PCR mix was: 2.8 μl of 1X GoTaq® Reaction Buffer, 0.2 mM of each dNTP, 1.25 U of GoTaq® G2 DNA Polymerase (Promega, USA), 1 μl of DNA (20 ng⁄μl) and 0.2 μM primers. The thermal profile for the reaction was: denaturation at 94 °C for 3 min, followed by 35 cycles at 94°C for 20 sec, *x* °C for 30 sec, 72°C for 30 sec, with a final 7 min extension step at 72 °C, where *x* °C is a different annealing temperature going from 54 to 60°C for *matK* and *rbcL* and from 54°C to 63°C for *trnh-psbA*, depending on the amplified species. PCR products were quality-checked on 2% agarose gel stained with GelRed (Biotium, USA) and then purified using Multiscreen® filter plates (Merckmillipore) and a vacuum manifold in order to carry out the sequencing reaction. The sequencing mix composition was: 4 µl of purified PCR product, 0.32 µl of Forward or Reverse Primer, 1.5X Sequencing Buffer and 0.5 µl of BigDye® Terminator v3.1 Ready Reaction Mix (ThermoFisher Scientific, USA) for a final volume of 6 µl. The sequencing thermal profile was characterized by a first step of denaturation at 94 °C for 1 min followed by 25 cycle at 96 °C for 10 sec, 50 °C for 5 sec, 60 °C for 3 min, with a final step at 10 °C for-ever. Sequencing reactions were then purified by membrane filtration using MultiScreenHTS® HV, 0.45 µm Plates (Merckmillipore) and Sephadex G50 (GE Healthcare) and analyzed on an AB 3500 automatic sequencer (Applied Biosystems, USA).

- When sequence data for Mediterranean tree species were available neither from NCBI nor could they be generated *de novo* by INRA-URFM or IBBR-CNR, the NCBI database was searched again in November 2018. We then looked for the closest relative, non-Mediterranean woody species available in NCBI to generate the missing genus-level sequence we needed for the analysis. This happened only a few times (see Appendices S4).

**References**

Kress, W.J., Erickson, D.L., 2007. A Two-Locus Global DNA Barcode for Land Plants: The Coding rbcL Gene Complements the Non-Coding trnH-psbA Spacer Region. PLOS ONE 2, e508. https://doi.org/10.1371/journal.pone.0000508

Kress, W.J., Wurdack, K.J., Zimmer, E.A., Weigt, L.A., Janzen, D.H., 2005. Use of DNA barcodes to identify flowering plants. Proc. Natl. Acad. Sci. U. S. A. 102, 8369–8374. https://doi.org/10.1073/pnas.0503123102

Sanger, F., Nicklen, S., Coulson, A.R., 1977. DNA sequencing with chain-terminating inhibitors. Proc. Natl. Acad. Sci. U. S. A. 74, 5463–5467.

**Appendix S3.** Fasta files for all consensus sequences at genus level for the organelle genes matK, rbcL and trnH-psbA.

This data file contains the consensus DNA sequences of the 64 genera used, for organelle genes matK, rbcL and trnH-psbA. It is published in the open access archive Zenodo under the title: “Genus level DNA sequence data for three genes (matK, rbcL, trnH-psbA) for the paper: A comprehensive, genus-level time-calibrated phylogeny of the tree flora of Mediterranean Europe and an assessment of its vulnerability”, and is publically accessible at: <http://doi.org/10.5281/zenodo.3466621>.

**Appendix S4.** Number of individual and species sequences used to create consensus DNA sequences at genus level. Species used for each genus and sequence references are also shown, one table per gene (Appendix S4-1 to S4-3).

| Genus | *matK* | | *rbcL* | | *trnH-psbA* | |
| --- | --- | --- | --- | --- | --- | --- |
| Species number | Sequence number | Species number | Sequence number | Species number | Sequence number |
| *Abies* | 5 | 37 | 4 | 35 | 5 | 21 |
| *Acer* | 6 | 57 | 6 | 35 | 6 | 58 |
| *Aesculus* | 1 | 4 | 1 | 9 | 1 | 6 |
| *Alnus* | 5 | 14 | 7 | 22 | 5 | 17 |
| *Arbutus* | 1 | 3 | 1 | 3 | 1 | 14 |
| *Betula* | 2 | 19 | 2 | 14 | 1 | 3 |
| *Buxus* | 2 | 8 | 2 | 13 | 1 | 8 |
| *Carpinus* | 2 | 12 | 2 | 11 | 1 | 5 |
| *Castanea* | 1 | 6 | 1 | 8 | 1 | 3 |
| *Cedrus* | 2 | 33 | 2 | 21 | 3 | 21 |
| *Celtis* | 1 | 1 | 2 | 5 | 1 | 5 |
| *Ceratonia* | 1 | 4 | 1 | 5 | 1 | 1 |
| *Cercis* | 1 | 1 | 1 | 2 | 1 | 3 |
| *Chamaerops* | 1 | 6 | 1 | 3 | 1 | 1 |
| *Corylus* | 2 | 18 | 2 | 13 | 1 | 2 |
| *Cotinus* | 1 | 1 | 1 | 4 | 1 | 6 |
| *Cotoneaster* | 1 | 1 | 1 | 1 | 1 | 1 |
| *Crataegus* | 4 | 28 | 2 | 20 | 5 | 29 |
| *Cupressus* | 1 | 2 | 1 | 18 | 1 | 13 |
| *Cytisus* | 1 | 1 | 1 | 1 | 1 | 1 |
| *Erica* | 1 | 9 | 1 | 1 | 1 | 5 |
| *Fagus* | 1 | 6 | 2 | 5 | 1 | 4 |
| *Ficus* | 1 | 11 | 1 | 12 | 1 | 8 |
| *Fontanesia* | 1 | 3 | 1 | 3 | 1 | 2 |
| *Frangula* | 1 | 10 | 1 | 11 | 1 | 2 |
| *Fraxinus* | 3 | 13 | 3 | 31 | 3 | 34 |
| *Genista* | 1 | 1 | 1 | 3 | 1 | 1 |
| *Ilex* | 1 | 5 | 1 | 13 | 1 | 9 |
| *Juglans* | 1 | 13 | 1 | 7 | 1 | 6 |
| *Juniperus* | 6 | 26 | 7 | 42 | 3 | 28 |
| *Laurus* | 1 | 12 | 1 | 11 | 1 | 7 |
| *Liquidambar* | 1 | 3 | 1 | 1 | 1 | 2 |
| *Lonicera* | 1 | 1 | 1 | 1 | 1 | 1 |
| *Malus* | 4 | 13 | 1 | 5 | 1 | 1 |
| *Myrica* | 1 | 1 | 1 | 5 | 1 | 1 |
| *Myrtus* | 1 | 7 | 1 | 7 | 1 | 9 |
| *Nerium* | 1 | 12 | 1 | 12 | 1 | 5 |
| *Olea* | 1 | 6 | 1 | 16 | 1 | 10 |
| *Ostrya* | 1 | 3 | 1 | 2 | 1 | 3 |
| *Phillyrea* | 2 | 5 | 2 | 10 | 2 | 7 |
| *Phoenix* | 1 | 1 | 1 | 6 | 1 | 1 |
| *Pinus* | 10 | 232 | 9 | 146 | 9 | 126 |
| *Pistacia* | 1 | 1 | 1 | 1 | 3 | 9 |
| *Platanus* | 1 | 4 | 1 | 4 | 1 | 5 |
| *Populus* | 3 | 32 | 3 | 27 | 3 | 11 |
| *Prunus* | 8 | 43 | 9 | 48 | 5 | 23 |
| *Pyrus* | 3 | 7 | 4 | 7 | 1 | 1 |
| *Quercus* | 6 | 15 | 17 | 79 | 15 | 94 |
| *Rhamnus* | 1 | 12 | 2 | 16 | 2 | 7 |
| *Rhododendron* | 1 | 1 | 1 | 1 | 1 | 1 |
| *Salix* | 10 | 67 | 10 | 76 | 5 | 14 |
| *Sambucus* | 2 | 15 | 2 | 14 | 2 | 11 |
| *Searsia* | 1 | 1 | 1 | 1 | 1 | 1 |
| *Sorbus* | 4 | 17 | 4 | 34 | 4 | 16 |
| *Spartium* | 1 | 2 | 1 | 1 | 1 | 1 |
| *Staphylea* | 1 | 2 | 1 | 1 | 1 | 1 |
| *Styrax* | 1 | 2 | 1 | 2 | 1 | 1 |
| *Tamarix* | 3 | 5 | 3 | 4 | 4 | 8 |
| *Taxus* | 1 | 26 | 1 | 17 | 1 | 18 |
| *Tetraclinis* | 1 | 2 | 1 | 2 | 1 | 1 |
| *Tilia* | 2 | 11 | 2 | 11 | 1 | 1 |
| *Ulmus* | 4 | 21 | 4 | 31 | 3 | 17 |
| *Vitex* | 1 | 2 | 1 | 2 | 1 | 1 |
| *Zelkova* | 1 | 1 | 2 | 2 | 2 | 7 |
| Mean | 2.18 | 14.65 | 2.39 | 15.21 | 2.07 | 11.54 |
| sd | 2.13 | 30.69 | 2.81 | 23.10 | 2.31 | 20.60 |

**Appendix S4-1.** Genus and species sequence description for *matK* (non-Mediterranean species appear in bold). Sequence codes include published NCBI references (starting with a two-letter code) and our own (starting with a six-letter code for INRA and with CNR of the CNR sequences).

| Genus | Species | Sequence reference code |
| --- | --- | --- |
| Abies | Abies alba Mill. | HQ619823.1 |
| Abies | Abies alba Mill. | Abi-alb_A03_BDV01574_run1_MATK_F |
| Abies | Abies alba Mill. | Abi-alb_A03_BDV01574_run1_MATK_R |
| Abies | Abies alba Mill. | Abi-alb_A07_BDV01575_run2_MATK_F |
| Abies | Abies alba Mill. | Abi-alb_A07_BDV01575_run2_MATK_R |
| Abies | Abies alba Mill. | Abi-alb_B01_BDV01575_run2_MATK_F |
| Abies | Abies alba Mill. | Abi-alb_B01_BDV01575_run2_MATK_R |
| Abies | Abies alba Mill. | Abi-alb_C01_BDV01575_run2_MATK_F |
| Abies | Abies alba Mill. | Abi-alb_C01_BDV01575_run2_MATK_R |
| Abies | Abies alba Mill. | Abi-alb_D12_BDV01575_run2_MATK_F |
| Abies | Abies alba Mill. | Abi-alb_D12_BDV01575_run2_MATK_R |
| Abies | Abies alba Mill. | Abi-alb_E05_BDV01574_run1_MATK_F |
| Abies | Abies alba Mill. | Abi-alb_E05_BDV01574_run1_MATK_R |
| Abies | Abies alba Mill. | Abi-alb_E12_BDV01575_run2_MATK_F |
| Abies | Abies alba Mill. | Abi-alb_E12_BDV01575_run2_MATK_R |
| Abies | Abies alba Mill. | Abi-alb_F12_BDV01575_run2_MATK_F |
| Abies | Abies alba Mill. | Abi-alb_F12_BDV01575_run2_MATK_R |
| Abies | Abies alba Mill. | Abi-alb_G12_BDV01575_run2_MATK_F |
| Abies | Abies alba Mill. | Abi-alb_G12_BDV01575_run2_MATK_R |
| Abies | Abies alba Mill. | Abi-alb_H06_BDV01575_run2_MATK_F |
| Abies | Abies alba Mill. | Abi-alb_H06_BDV01575_run2_MATK_R |
| Abies | Abies borisii-regis Mattf. | Abi-reg_C01_BDV01574_run1_MATK_F |
| Abies | Abies borisii-regis Mattf. | Abi-reg_C01_BDV01574_run1_MATK_R |
| Abies | Abies borisii-regis Mattf. | Abi-reg_D01_BDV01574_run1_MATK_F |
| Abies | Abies borisii-regis Mattf. | Abi-reg_D01_BDV01574_run1_MATK_R |
| Abies | Abies cephalonica Loudon | Abi-cep_A01_BDV01574_run1_MATK_F |
| Abies | Abies cephalonica Loudon | Abi-cep_A01_BDV01574_run1_MATK_R |
| Abies | Abies cephalonica Loudon | Abi-cep_B01_BDV01574_run1_MATK_F |
| Abies | Abies cephalonica Loudon | Abi-cep_B01_BDV01574_run1_MATK_R |
| Abies | Abies cephalonica Loudon | Abi-cep_D03_BDV01574_run1_MATK_F |
| Abies | Abies cephalonica Loudon | Abi-cep_D03_BDV01574_run1_MATK_R |
| Abies | Abies cephalonica Loudon | Abi-cep_F03_BDV01574_run1_MATK_F |
| Abies | Abies cephalonica Loudon | Abi-cep_F03_BDV01574_run1_MATK_R |
| Abies | Abies nebrodensis (Lojac.) Mattei | Abi-neb_C12_BDV01575_run2_MATK_F |
| Abies | Abies nebrodensis (Lojac.) Mattei | Abi-neb_C12_BDV01575_run2_MATK_R |
| Abies | Abies pinsapo Boiss. | Abi-pin_D05_BDV01574_run1_MATK_F |
| Abies | Abies pinsapo Boiss. | Abi-pin_D05_BDV01574_run1_MATK_R |
| Acer | Acer campestre L | AJ438794.1 |
| Acer | Acer campestre L | KU549937.1 |
| Acer | Acer campestre L | AJ438796.1 |
| Acer | Acer campestre L | HE970664.1 |
| Acer | Acer campestre L | JN894032.1 |
| Acer | Acer campestre L | JN894999.1 |
| Acer | Acer campestre L | JN895005.1 |
| Acer | Acer campestre L | KC584926.1 |
| Acer | Acer campestre L | KU549936.1 |
| Acer | Acer monspessulanum L | KU549984.1 |
| Acer | Acer monspessulanum L | AJ438789.1 |
| Acer | Acer monspessulanum L | AJ438790.1 |
| Acer | Acer monspessulanum L | KU549977.1 |
| Acer | Acer monspessulanum L | KU549978.1 |
| Acer | Acer monspessulanum L | KU549979.1 |
| Acer | Acer monspessulanum L | KU549981.1 |
| Acer | Acer monspessulanum L | KU549985.1 |
| Acer | Acer monspessulanum L | KU549987.1 |
| Acer | Acer opalus Mill. | AJ438787.1 |
| Acer | Acer opalus Mill. | KU549991.1 |
| Acer | Acer opalus Mill. | KU549992.1 |
| Acer | Acer opalus Mill. | KU549995.1 |
| Acer | Acer opalus Mill. | KU549996.1 |
| Acer | Acer opalus Mill. | KU549997.1 |
| Acer | Acer opalus Mill. | KU549998.1 |
| Acer | Acer opalus Mill. | KU549988.1 |
| Acer | Acer opalus Mill. | KU549989.1 |
| Acer | Acer opalus Mill. | KU549990.1 |
| Acer | Acer opalus Mill. | KU549993.1 |
| Acer | Acer opalus Mill. | KU549994.1 |
| Acer | Acer opalus Mill. | KU549999.1 |
| Acer | Acer opalus Mill. | KU550000.1 |
| Acer | Acer platanoides L. | EU749282.1 |
| Acer | Acer platanoides L. | EU749283.1 |
| Acer | Acer platanoides L. | AJ438788.1 |
| Acer | Acer platanoides L. | KU549963.1 |
| Acer | Acer platanoides L. | KU549971.1 |
| Acer | Acer platanoides L. | KU549973.1 |
| Acer | Acer platanoides L. | KU549974.1 |
| Acer | Acer platanoides L. | KU549976.1 |
| Acer | Acer platanoides L. | KU549962.1 |
| Acer | Acer platanoides L. | KU549964.1 |
| Acer | Acer platanoides L. | KU549966.1 |
| Acer | Acer platanoides L. | KU549967.1 |
| Acer | Acer pseudoplatanus L. | AJ438783.1 |
| Acer | Acer pseudoplatanus L. | AJ438781.1 |
| Acer | Acer pseudoplatanus L. | AJ438784.1 |
| Acer | Acer pseudoplatanus L. | AJ438786.1 |
| Acer | Acer pseudoplatanus L. | KU550005.1 |
| Acer | Acer pseudoplatanus L. | KU550007.1 |
| Acer | Acer pseudoplatanus L. | KU550017.1 |
| Acer | Acer pseudoplatanus L. | KU550004.1 |
| Acer | Acer pseudoplatanus L. | KU550019.1 |
| Acer | Acer tataricum L. | JF953001.1 |
| Acer | Acer tataricum L. | JF953002.1 |
| Acer | Acer tataricum L. | JF952999.1 |
| Acer | Acer tataricum L. | JF953000.1 |
| Aesculus | Aesculus hippocastanum L. | AB872534.1 |
| Aesculus | Aesculus hippocastanum L. | AY724266.1 |
| Aesculus | Aesculus hippocastanum L. | AY968630.1 |
| Aesculus | Aesculus hippocastanum L. | AY968631.1 |
| Alnus | Alnus cordata (Loisel.) Loisel | FJ844590.1 |
| Alnus | Alnus cordata (Loisel.) Loisel | HQ600558.1 |
| Alnus | Alnus glutinosa (L.) Gaertn. | FJ844593.1 |
| Alnus | Alnus glutinosa (L.) Gaertn. | HQ600562.1 |
| Alnus | Alnus glutinosa (L.) Gaertn. | JN895386.1 |
| Alnus | Alnus glutinosa (L.) Gaertn. | KF419025.1 |
| Alnus | Alnus incana (L.) Moench | HM850705.1 |
| Alnus | Alnus incana (L.) Moench | KJ204437.1 |
| Alnus | Alnus incana (L.) Moench | FJ011818.1 |
| Alnus | Alnus incana (L.) Moench | KF419026.1 |
| Alnus | Alnus incana (L.) Moench | KJ592842.1 |
| Alnus | Alnus orientalis Decne. | KF419030.1 |
| Alnus | Alnus orientalis Decne. | FJ844598.1 |
| Alnus | Alnus viridis (Chaix) DC. | FJ844605.1 |
| Arbutus | Arbutus unedo L. | JQ067650.2 |
| Arbutus | Arbutus unedo L. | KM527356.1 |
| Arbutus | Arbutus unedo L. | KF997315.1 |
| Betula | Betula pendula Roth | AM889694.1 |
| Betula | Betula pendula Roth | AY372009.1 |
| Betula | Betula pendula Roth | AY372010.1 |
| Betula | Betula pendula Roth | AY372011.1 |
| Betula | Betula pendula Roth | AY372012.1 |
| Betula | Betula pendula Roth | AY372014.1 |
| Betula | Betula pendula Roth | FJ011829.1 |
| Betula | Betula pendula Roth | GU373400.1 |
| Betula | Betula pendula Roth | KJ204446.1 |
| Betula | Betula pendula Roth | AM503810.1 |
| Betula | Betula pendula Roth | GQ248087.1 |
| Betula | Betula pendula Roth | JN895193.1 |
| Betula | Betula pendula Roth | JN895391.1 |
| Betula | Betula pendula Roth | JN895392.1 |
| Betula | Betula pubescens Ehrh. | JN895860.1 |
| Betula | Betula pubescens Ehrh. | AY372025.1 |
| Betula | Betula pubescens Ehrh. | GU373399.1 |
| Betula | Betula pubescens Ehrh. | JN895704.1 |
| Betula | Betula pubescens Ehrh. | JN895851.1 |
| Buxus | Buxus balearica Lam. | HE966885.1 |
| Buxus | Buxus sempervirens L. | HE966886.1 |
| Buxus | Buxus sempervirens L. | HE966887.1 |
| Buxus | Buxus sempervirens L. | HQ619805.1 |
| Buxus | Buxus sempervirens L. | AF186397.1 |
| Buxus | Buxus sempervirens L. | AF543728.1 |
| Buxus | Buxus sempervirens L. | HM850588.1 |
| Buxus | Buxus sempervirens L. | AJ966792.1 |
| Carpinus | Carpinus betulus L. | AJ417511.1 |
| Carpinus | Carpinus betulus L. | AJ417512.1 |
| Carpinus | Carpinus betulus L. | AJ417514.1 |
| Carpinus | Carpinus betulus L. | AJ417515.1 |
| Carpinus | Carpinus betulus L. | LT671639.1 |
| Carpinus | Carpinus betulus L. | AF297392.1 |
| Carpinus | Carpinus betulus L. | JN894261.1 |
| Carpinus | Carpinus betulus L. | JN895396.1 |
| Carpinus | Carpinus betulus L. | AY212015.1 |
| Carpinus | Carpinus betulus L. | AY263915.1 |
| Carpinus | Carpinus betulus L. | FJ011781.1 |
| Carpinus | Carpinus orientalis Mill. | HE966898.1 |
| Castanea | Castanea sativa Mill. | HE967367.1 |
| Castanea | Castanea sativa Mill. | JN894077.1 |
| Castanea | Castanea sativa Mill. | JN894680.1 |
| Castanea | Castanea sativa Mill. | JN895513.1 |
| Castanea | Castanea sativa Mill. | HM850888.1 |
| Castanea | Castanea sativa Mill. | KP096452.1 |
| Cedrus | Cedrus brevifolia (Hook.f.) Elwes & A.Henry | Ced-bre_A09_BDV01574_run1_MATK_F |
| Cedrus | Cedrus brevifolia (Hook.f.) Elwes & A.Henry | Ced-bre_F08_BDV01574_run1_MATK_F |
| Cedrus | Cedrus brevifolia (Hook.f.) Elwes & A.Henry | Ced-bre_H08_BDV01574_run1_MATK_F |
| Cedrus | Cedrus brevifolia (Hook.f.) Elwes & A.Henry | Ced-bre_H08_SI00194_run1_MATK_R |
| Cedrus | Cedrus libani A. Richard | LK391736.1 |
| Cedrus | Cedrus libani A. Richard | Ced-lib_A08_BDV01574_run1_MATK_F |
| Cedrus | Cedrus libani A. Richard | Ced-lib_E07_BDV01574_run1_MATK_F |
| Cedrus | Cedrus libani A. Richard | Ced-lib_F07_BDV01574_run1_MATK_F |
| Cedrus | Cedrus libani A. Richard | Ced-lib_G07_BDV01574_run1_MATK_F |
| Cedrus | Cedrus libani A. Richard | Ced-lib_H07_BDV01574_run1_MATK_F |
| Cedrus | Cedrus libani A. Richard | Ced-lib_A08_BDV01574_run1_MATK_R |
| Cedrus | Cedrus libani A. Richard | Ced-lib_A08_SI00194_run1_MATK_F |
| Cedrus | Cedrus libani A. Richard | Ced-lib_A08_SI00194_run1_MATK_R |
| Cedrus | Cedrus libani A. Richard | Ced-lib_E07_BDV01574_run1_MATK_R |
| Cedrus | Cedrus libani A. Richard | Ced-lib_E07_SI00194_run1_MATK_F |
| Cedrus | Cedrus libani A. Richard | Ced-lib_E07_SI00194_run1_MATK_R |
| Cedrus | Cedrus libani A. Richard | Ced-lib_F07_BDV01574_run1_MATK_R |
| Cedrus | Cedrus libani A. Richard | Ced-lib_F07_SI00194_run1_MATK_F |
| Cedrus | Cedrus libani A. Richard | Ced-lib_F07_SI00194_run1_MATK_R |
| Cedrus | Cedrus libani A. Richard | Ced-lib_G07_BDV01574_run1_MATK_R |
| Cedrus | Cedrus libani A. Richard | Ced-lib_G07_SI00194_run1_MATK_F |
| Cedrus | Cedrus libani A. Richard | Ced-lib_G07_SI00194_run1_MATK_R |
| Cedrus | Cedrus libani A. Richard | Ced-lib_H07_BDV01574_run1_MATK_R |
| Cedrus | Cedrus libani A. Richard | Ced-lib_H07_SI00194_run1_MATK_F |
| Cedrus | Cedrus libani A. Richard | Ced-lib_H07_SI00194_run1_MATK_R |
| Celtis | Celtis australis L. | HE967374.1 |
| Ceratonia | Ceratonia siliqua L. | KJ468096.1 |
| Ceratonia | Ceratonia siliqua L. | AY386852.1 |
| Ceratonia | Ceratonia siliqua L. | EU361911.1 |
| Ceratonia | Ceratonia siliqua L. | JX495689.1 |
| Cercis | **Cercis canadensis L.** | KX161997.1 |
| Chamaerops | Chamaerops humilis L. | NC_029967. |
| Chamaerops | Chamaerops humilis L. | AM114568.1 |
| Chamaerops | Chamaerops humilis L. | KF746479.1 |
| Chamaerops | Chamaerops humilis L. | HM850589.1 |
| Chamaerops | Chamaerops humilis L. | KT312935.1 |
| Chamaerops | Chamaerops humilis L. | JX495691.1 |
| Corylus | Corylus avellana L. | KX822768.2 |
| Corylus | Corylus avellana L. | AF297363.1 |
| Corylus | Corylus avellana L. | AF297364.1 |
| Corylus | Corylus avellana L. | AF297365.1 |
| Corylus | Corylus avellana L. | AF297378.1 |
| Corylus | Corylus avellana L. | AF297381.1 |
| Corylus | Corylus avellana L. | AY373440.1 |
| Corylus | Corylus avellana L. | AY373441.1 |
| Corylus | Corylus avellana L. | AY373442.1 |
| Corylus | Corylus avellana L. | JN894157.1 |
| Corylus | Corylus avellana L. | JN895020.1 |
| Corylus | Corylus avellana L. | JN895886.1 |
| Corylus | Corylus avellana L. | AY263916.1 |
| Corylus | Corylus avellana L. | HM850898.1 |
| Corylus | Corylus avellana L. | FR865055.1 |
| Corylus | Corylus avellana L. | KJ204462.1 |
| Corylus | Corylus colurna L. | AF297383.1 |
| Corylus | Corylus colurna L. | AF297384.1 |
| Cotinus | Cotinus coggygria Scop | MF349885.1 |
| Cotoneaster | **Cotoneaster multiflorus Bunge** | MG704050.1 |
| Crataegus | Crataegus heldreichii Boiss. | KC251065.1 |
| Crataegus | Crataegus laevigata (Poir.) DC. | JN893929.1 |
| Crataegus | Crataegus laevigata (Poir.) DC. | JN893930.1 |
| Crataegus | Crataegus laevigata (Poir.) DC. | JN894643.1 |
| Crataegus | Crataegus laevigata (Poir.) DC. | KC251073.1 |
| Crataegus | Crataegus laevigata (Poir.) DC. | KC251074.1 |
| Crataegus | Crataegus laevigata (Poir.) DC. | KC251075.1 |
| Crataegus | Crataegus laevigata (Poir.) DC. | KJ506861.1 |
| Crataegus | Crataegus laevigata (Poir.) DC. | KJ506862.1 |
| Crataegus | Crataegus laevigata (Poir.) DC. | KJ506863.1 |
| Crataegus | Crataegus laevigata (Poir.) DC. | KJ506864.1 |
| Crataegus | Crataegus laevigata (Poir.) DC. | KJ506865.1 |
| Crataegus | Crataegus laevigata (Poir.) DC. | KJ506866.1 |
| Crataegus | Crataegus monogyna Jacq. | KJ746124.1 |
| Crataegus | Crataegus monogyna Jacq. | AF288099.1 |
| Crataegus | Crataegus monogyna Jacq. | KC251091.1 |
| Crataegus | Crataegus monogyna Jacq. | KC251093.1 |
| Crataegus | Crataegus monogyna Jacq. | KC251095.1 |
| Crataegus | Crataegus monogyna Jacq. | KC251096.1 |
| Crataegus | Crataegus monogyna Jacq. | KC251097.1 |
| Crataegus | Crataegus monogyna Jacq. | KC251098.1 |
| Crataegus | Crataegus monogyna Jacq. | KC251099.1 |
| Crataegus | Crataegus monogyna Jacq. | KJ204463.1 |
| Crataegus | Crataegus pentagyna Willd. | KC173396.1 |
| Crataegus | Crataegus pentagyna Willd. | KC173405.1 |
| Crataegus | Crataegus pentagyna Willd. | KC251110.1 |
| Crataegus | Crataegus pentagyna Willd. | KC251111.1 |
| Crataegus | Crataegus pentagyna Willd. | KC251112.1 |
| Cupressus | Cupressus sempervirens L. | NC_026296.1 |
| Cupressus | Cupressus sempervirens L. | HM023994.1 |
| Cytisus | **Cytisus scoparius (L.) Link** | AY386902.1 |
| Erica | Erica arborea L. | KP737748.1 |
| Erica | Erica arborea L. | KP737750.1 |
| Erica | Erica arborea L. | KP737751.1 |
| Erica | Erica arborea L. | KP737752.1 |
| Erica | Erica arborea L. | KP737753.1 |
| Erica | Erica arborea L. | KP737754.1 |
| Erica | Erica arborea L. | KP737755.1 |
| Erica | Erica arborea L. | KP737756.1 |
| Erica | Erica arborea L. | KP737758.1 |
| Fagus | Fagus sylvatica L. | JN895059.1 |
| Fagus | Fagus sylvatica L. | JN895534.1 |
| Fagus | Fagus sylvatica L. | JN895535.1 |
| Fagus | Fagus sylvatica L. | KF419012.1 |
| Fagus | Fagus sylvatica L. | AB046507.1 |
| Fagus | Fagus sylvatica L. | KU509047.1 |
| Ficus | Ficus carica L. | KM456197.1 |
| Ficus | Ficus carica L. | KM456198.1 |
| Ficus | Ficus carica L. | KM456199.1 |
| Ficus | Ficus carica L. | KM456200.1 |
| Ficus | Ficus carica L. | KM456201.1 |
| Ficus | Ficus carica L. | KM456202.1 |
| Ficus | Ficus carica L. | AY257530.1 |
| Ficus | Ficus carica L. | HM851108.1 |
| Ficus | Ficus carica L. | KC584930.1 |
| Ficus | Ficus carica L. | JQ412245.1 |
| Ficus | Ficus carica L. | KP089072.1 |
| Fontanesia | Fontanesia philliraeoides Labill. | HQ384545.1 |
| Fontanesia | Fontanesia philliraeoides Labill. | KP089075.1 |
| Fontanesia | Fontanesia philliraeoides Labill. | KP089076.1 |
| Frangula | Frangula alnus Mill. | JN894230.1 |
| Frangula | Frangula alnus Mill. | JN894808.1 |
| Frangula | Frangula alnus Mill. | JN894976.1 |
| Frangula | Frangula alnus Mill. | AY257532.1 |
| Frangula | Frangula alnus Mill. | EU749373.1 |
| Frangula | Frangula alnus Mill. | EU749374.1 |
| Frangula | Frangula alnus Mill. | KJ592953.1 |
| Frangula | Frangula alnus Mill. | KJ592954.1 |
| Frangula | Frangula alnus Mill. | KJ592955.1 |
| Frangula | Frangula alnus Mill. | KJ592956.1 |
| Fraxinus | Fraxinus angustifolia Vahl | HM171497.1 |
| Fraxinus | Fraxinus angustifolia Vahl | HM171527.1 |
| Fraxinus | Fraxinus angustifolia Vahl | LN590005.1 |
| Fraxinus | Fraxinus excelsior L. | HM171528.1 |
| Fraxinus | Fraxinus excelsior L. | JN893856.1 |
| Fraxinus | Fraxinus excelsior L. | JN894346.1 |
| Fraxinus | Fraxinus excelsior L. | JN895188.1 |
| Fraxinus | Fraxinus excelsior L. | AM933427.1 |
| Fraxinus | Fraxinus excelsior L. | FJ395414.1 |
| Fraxinus | Fraxinus excelsior L. | KJ204481.1 |
| Fraxinus | Fraxinus ornus L. | HM171487.1 |
| Fraxinus | Fraxinus ornus L. | HM171490.1 |
| Fraxinus | Fraxinus ornus L. | HM171495.1 |
| Genista | **Genista monspessulana (L.) L.A.S.Johnson** | AY386862.1 |
| Ilex | Ilex aquifolium L. | HE967420.1 |
| Ilex | Ilex aquifolium L. | JN895297.1 |
| Ilex | Ilex aquifolium L. | JN895298.1 |
| Ilex | Ilex aquifolium L. | JN896160.1 |
| Ilex | Ilex aquifolium L. | FJ395435.1 |
| Juglans | Juglans regia L. | NC_028617. |
| Juglans | Juglans regia L. | KC920668.1 |
| Juglans | Juglans regia L. | KC920669.1 |
| Juglans | Juglans regia L. | KC920670.1 |
| Juglans | Juglans regia L. | KC920671.1 |
| Juglans | Juglans regia L. | KC920672.1 |
| Juglans | Juglans regia L. | KC920673.1 |
| Juglans | Juglans regia L. | KC920674.1 |
| Juglans | Juglans regia L. | KC920675.1 |
| Juglans | Juglans regia L. | KC920676.1 |
| Juglans | Juglans regia L. | KC920677.1 |
| Juglans | Juglans regia L. | AF118038.1 |
| Juglans | Juglans regia L. | KP089109.1 |
| Juniperus | Juniperus communis L. | FR865064.1 |
| Juniperus | Juniperus communis L. | AY988359.1 |
| Juniperus | Juniperus communis L. | EU749463.1 |
| Juniperus | Juniperus communis L. | EU749464.1 |
| Juniperus | Juniperus communis L. | EU749465.1 |
| Juniperus | Juniperus communis L. | EU749466.1 |
| Juniperus | Juniperus communis L. | HM024017.1 |
| Juniperus | Juniperus communis L. | HM024018.1 |
| Juniperus | Juniperus communis L. | HM024019.1 |
| Juniperus | Juniperus communis L. | HQ832750.1 |
| Juniperus | Juniperus communis L. | JF954229.1 |
| Juniperus | Juniperus communis L. | JF954230.1 |
| Juniperus | Juniperus communis L. | JQ512428.1 |
| Juniperus | Juniperus communis L. | JQ512429.1 |
| Juniperus | Juniperus communis L. | JQ512430.1 |
| Juniperus | Juniperus communis L. | JQ512431.1 |
| Juniperus | Juniperus drupacea Labill. | AF152198.1 |
| Juniperus | Juniperus drupacea Labill. | HM024023.1 |
| Juniperus | Juniperus excelsa M. Bieb | HM024025.1 |
| Juniperus | Juniperus oxycedrus L. | Jun-oxy_A06_BDV01576_run3_MATK_F |
| Juniperus | Juniperus oxycedrus L. | Jun-oxy_A06_BDV01576_run3_MATK_R |
| Juniperus | Juniperus oxycedrus L. | HM024041.1 |
| Juniperus | Juniperus phoenicea L. | HM024042.1 |
| Juniperus | Juniperus phoenicea L. | Jun-pho_F06_BDV01576_run3_MATK_F |
| Juniperus | Juniperus phoenicea L. | Jun-pho_F06_BDV01576_run3_MATK_R |
| Juniperus | Juniperus thurifera L. | HM024063.1 |
| Laurus | Laurus nobilis L. | FJ408869.1 |
| Laurus | Laurus nobilis L. | FJ408870.1 |
| Laurus | Laurus nobilis L. | FJ408871.1 |
| Laurus | Laurus nobilis L. | FJ408872.1 |
| Laurus | Laurus nobilis L. | FJ408873.1 |
| Laurus | Laurus nobilis L. | FJ408874.1 |
| Laurus | Laurus nobilis L. | FJ408875.1 |
| Laurus | Laurus nobilis L. | FJ408877.1 |
| Laurus | Laurus nobilis L. | FJ408878.1 |
| Laurus | Laurus nobilis L. | FJ408879.1 |
| Laurus | Laurus nobilis L. | FJ408880.1 |
| Laurus | Laurus nobilis L. | HQ619817.1 |
| Liquidambar | Liquidambar orientalis Miller | AF015651.1 |
| Liquidambar | Liquidambar orientalis Miller | AF133220.1 |
| Liquidambar | Liquidambar orientalis Miller | AF304519.1 |
| Lonicera | **Lonicera sachalinensis (F.Schmidt) Nakai** | NC_039637.1 |
| Malus | Malus florentina (Zuccagni) C.K. Schneider | AF309182.1 |
| Malus | Malus ioensis vouche | JQ391034.1 |
| Malus | Malus sylvestris Mill. | AM042563.1 |
| Malus | Malus sylvestris Mill. | AF309231.1 |
| Malus | Malus sylvestris Mill. | JN894106.1 |
| Malus | Malus sylvestris Mill. | JN894111.1 |
| Malus | Malus sylvestris Mill. | JN895783.1 |
| Malus | Malus sylvestris Mill. | AF309177.1 |
| Malus | Malus sylvestris Mill. | JQ391013.1 |
| Malus | Malus trilobata (Labill.) C.K. Schneider | AF309189.1 |
| Malus | Malus trilobata (Labill.) C.K. Schneider | AF309233.1 |
| Malus | Malus trilobata (Labill.) C.K. Schneider | DQ860463.1 |
| Malus | Malus trilobata (Labill.) C.K. Schneider | JQ391004.1 |
| Myrica | **Morella rubra Lour.** | KY476637.1 |
| Myrtus | Myrtus communis L. | HF585088.1 |
| Myrtus | Myrtus communis L. | HF585089.1 |
| Myrtus | Myrtus communis L. | HM851053.1 |
| Myrtus | Myrtus communis L. | AM490009.1 |
| Myrtus | Myrtus communis L. | HE967444.1 |
| Myrtus | Myrtus communis L. | JN660989.1 |
| Myrtus | Myrtus communis L. | AY525136.2 |
| Nerium | Nerium oleander L. | NC_025656. |
| Nerium | Nerium oleander L. | FN668821.1 |
| Nerium | Nerium oleander L. | HQ619791.1 |
| Nerium | Nerium oleander L. | HM850834.1 |
| Nerium | Nerium oleander L. | KP149499.1 |
| Nerium | Nerium oleander L. | EF456295.1 |
| Nerium | Nerium oleander L. | AY899942.1 |
| Nerium | Nerium oleander L. | GQ997641.1 |
| Nerium | Nerium oleander L. | JN114763.1 |
| Nerium | Nerium oleander L. | JN416981.1 |
| Nerium | Nerium oleander L. | JQ412271.1 |
| Nerium | Nerium oleander L. | KP089165.1 |
| Olea | Olea europaea L. | NC_015401. |
| Olea | Olea europaea L. | AM933382.1 |
| Olea | Olea europaea L. | AM933383.1 |
| Olea | Olea europaea L. | FN996972.1 |
| Olea | Olea europaea L. | FN997651.1 |
| Olea | Olea europaea L. | JX518125.1 |
| Ostrya | Ostrya carpinifolia Scop. | AY212004.1 |
| Ostrya | Ostrya carpinifolia Scop. | FJ011808.1 |
| Ostrya | Ostrya carpinifolia Scop. | HE967451.1 |
| Phillyrea | Phillyrea angustifolia L. | HE967458.1 |
| Phillyrea | Phillyrea angustifolia L. | JX863025.1 |
| Phillyrea | Phillyrea angustifolia L. | LN515428.1 |
| Phillyrea | Phillyrea latifolia L. | FM208252.1 |
| Phillyrea | Phillyrea latifolia L. | KC163179.1 |
| Phoenix | **Phoenix dactylifera L.** | MH176159.1 |
| Pinus | inus mugo Turra | Pin-mug_A09_BDV01575_run2_MATK_F |
| Pinus | Pinus brutia Ten. | Pin-bru_A11_BDV01574_run1_MATK_F |
| Pinus | Pinus brutia Ten. | Pin-bru_B10_BDV01574_run1_MATK_F |
| Pinus | Pinus brutia Ten. | Pin-bru_C10_BDV01574_run1_MATK_F |
| Pinus | Pinus brutia Ten. | Pin-bru_A11_BDV01574_run1_MATK_R |
| Pinus | Pinus brutia Ten. | Pin-bru_A11_SI00194_run1_MATK_F |
| Pinus | Pinus brutia Ten. | Pin-bru_A11_SI00194_run1_MATK_R |
| Pinus | Pinus brutia Ten. | Pin-bru_B10_BDV01574_run1_MATK_R |
| Pinus | Pinus brutia Ten. | Pin-bru_B10_SI00194_run1_MATK_F |
| Pinus | Pinus brutia Ten. | Pin-bru_B10_SI00194_run1_MATK_R |
| Pinus | Pinus brutia Ten. | Pin-bru_C10_BDV01574_run1_MATK_R |
| Pinus | Pinus brutia Ten. | Pin-bru_C10_SI00194_run1_MATK_F |
| Pinus | Pinus brutia Ten. | Pin-bru_C10_SI00194_run1_MATK_R |
| Pinus | Pinus brutia Ten. | Pin-bru_D07_BDV01575_run2_MATK_F |
| Pinus | Pinus brutia Ten. | Pin-bru_D07_BDV01575_run2_MATK_R |
| Pinus | Pinus brutia Ten. | Pin-bru_D11_BDV01575_run2_MATK_F |
| Pinus | Pinus brutia Ten. | Pin-bru_D11_BDV01575_run2_MATK_R |
| Pinus | Pinus brutia Ten. | AB019857.1 |
| Pinus | Pinus brutia Ten. | JN854224.1 |
| Pinus | Pinus brutia Ten. | KP089952.1 |
| Pinus | Pinus brutia Ten. | AB161018.1 |
| Pinus | Pinus halepensis Miller | Pin-hal_A11_BDV01575_run2_MATK_ |
| Pinus | Pinus halepensis Miller | Pin-hal_A11_BDV01575_run2_MATK_R |
| Pinus | Pinus halepensis Miller | Pin-hal_B09_BDV01574_run1_MATK_F |
| Pinus | Pinus halepensis Miller | Pin-hal_B09_BDV01574_run1_MATK_R |
| Pinus | Pinus halepensis Miller | Pin-hal_B09_SI00194_run1_MATK_F |
| Pinus | Pinus halepensis Miller | Pin-hal_B09_SI00194_run1_MATK_R |
| Pinus | Pinus halepensis Miller | Pin-hal_B11_BDV01575_run2_MATK_F |
| Pinus | Pinus halepensis Miller | Pin-hal_C09_BDV01574_run1_MATK_F |
| Pinus | Pinus halepensis Miller | Pin-hal_C09_BDV01574_run1_MATK_R |
| Pinus | Pinus halepensis Miller | Pin-hal_C09_SI00194_run1_MATK_F |
| Pinus | Pinus halepensis Miller | Pin-hal_C09_SI00194_run1_MATK_R |
| Pinus | Pinus halepensis Miller | Pin-hal_D09_BDV01574_run1_MATK_F |
| Pinus | Pinus halepensis Miller | Pin-hal_D09_BDV01574_run1_MATK_R |
| Pinus | Pinus halepensis Miller | Pin-hal_D10_BDV01574_run1_MATK_F |
| Pinus | Pinus halepensis Miller | Pin-hal_D10_BDV01574_run1_MATK_R |
| Pinus | Pinus halepensis Miller | Pin-hal_D10_SI00194_run1_MATK_F |
| Pinus | Pinus halepensis Miller | Pin-hal_D10_SI00194_run1_MATK_R |
| Pinus | Pinus halepensis Miller | Pin-hal_E05_BDV01576_run3_MATK_F |
| Pinus | Pinus halepensis Miller | Pin-hal_E05_BDV01576_run3_MATK_R |
| Pinus | Pinus halepensis Miller | Pin-hal_E10_BDV01574_run1_MATK_F |
| Pinus | Pinus halepensis Miller | Pin-hal_E10_BDV01574_run1_MATK_R |
| Pinus | Pinus halepensis Miller | Pin-hal_E10_SI00194_run1_MATK_F |
| Pinus | Pinus halepensis Miller | Pin-hal_E10_SI00194_run1_MATK_R |
| Pinus | Pinus halepensis Miller | Pin-hal_F10_BDV01574_run1_MATK_F |
| Pinus | Pinus halepensis Miller | Pin-hal_F10_BDV01574_run1_MATK_R |
| Pinus | Pinus halepensis Miller | Pin-hal_F10_SI00194_run1_MATK_F |
| Pinus | Pinus halepensis Miller | Pin-hal_F10_SI00194_run1_MATK_R |
| Pinus | Pinus halepensis Miller | Pin-hal_G10_BDV01574_run1_MATK_F |
| Pinus | Pinus halepensis Miller | Pin-hal_G10_BDV01574_run1_MATK_R |
| Pinus | Pinus halepensis Miller | Pin-hal_G10_SI00194_run1_MATK_F |
| Pinus | Pinus halepensis Miller | Pin-hal_G10_SI00194_run1_MATK_R |
| Pinus | Pinus halepensis Miller | Pin-hal_H05_BDV01575_run2_MATK_F |
| Pinus | Pinus halepensis Miller | Pin-hal_H05_BDV01575_run2_MATK_R |
| Pinus | Pinus halepensis Miller | AB019856.1 |
| Pinus | Pinus halepensis Miller | AB081089.1 |
| Pinus | Pinus halepensis Miller | JN854197.1 |
| Pinus | Pinus halepensis Miller | JX905942.1 |
| Pinus | Pinus heldreichii Christ | Pin-hel_A06_BDV01574_run1_MATK_F |
| Pinus | Pinus heldreichii Christ | Pin-hel_A06_BDV01574_run1_MATK_R |
| Pinus | Pinus heldreichii Christ | Pin-hel_A06_SI00194_run1_MATK_F |
| Pinus | Pinus heldreichii Christ | Pin-hel_A06_SI00194_run1_MATK_R |
| Pinus | Pinus heldreichii Christ | Pin-hel_B06_BDV01574_run1_MATK_F |
| Pinus | Pinus heldreichii Christ | Pin-hel_B06_BDV01574_run1_MATK_R |
| Pinus | Pinus heldreichii Christ | Pin-hel_B06_SI00194_run1_MATK_F |
| Pinus | Pinus heldreichii Christ | Pin-hel_B06_SI00194_run1_MATK_R |
| Pinus | Pinus heldreichii Christ | Pin-leu_A08_BDV01575_run2_MATK_F |
| Pinus | Pinus heldreichii Christ | Pin-leu_A08_BDV01575_run2_MATK_R |
| Pinus | Pinus heldreichii Christ | Pin-leu_B08_BDV01575_run2_MATK_F |
| Pinus | Pinus heldreichii Christ | Pin-leu_B08_BDV01575_run2_MATK_R |
| Pinus | Pinus heldreichii Christ | Pin-leu_F07_BDV01575_run2_MATK_F |
| Pinus | Pinus heldreichii Christ | Pin-leu_F07_BDV01575_run2_MATK_R |
| Pinus | Pinus heldreichii Christ | Pin-leu_G07_BDV01575_run2_MATK_F |
| Pinus | Pinus heldreichii Christ | Pin-leu_G07_BDV01575_run2_MATK_R |
| Pinus | Pinus heldreichii Christ | AB019858.1 |
| Pinus | Pinus heldreichii Christ | AB161006.1 |
| Pinus | Pinus heldreichii Christ | DQ353714.1 |
| Pinus | Pinus mugo Turra | AB063504.1 |
| Pinus | Pinus mugo Turra | AB081087.1 |
| Pinus | Pinus mugo Turra | JN854181.1 |
| Pinus | Pinus mugo Turra | AB097782.1 |
| Pinus | Pinus nigra J.F. Arnold | Pin-nig_A04_BDV01574_run1_MATK_F |
| Pinus | Pinus nigra J.F. Arnold | Pin-nig_A04_BDV01574_run1_MATK_R |
| Pinus | Pinus nigra J.F. Arnold | Pin-nig_A04_SI00194_run1_MATK_F |
| Pinus | Pinus nigra J.F. Arnold | Pin-nig_A04_SI00194_run1_MATK_R |
| Pinus | Pinus nigra J.F. Arnold | Pin-nig_B04_BDV01574_run1_MATK_F |
| Pinus | Pinus nigra J.F. Arnold | Pin-nig_B04_BDV01574_run1_MATK_R |
| Pinus | Pinus nigra J.F. Arnold | Pin-nig_B04_SI00194_run1_MATK_F |
| Pinus | Pinus nigra J.F. Arnold | Pin-nig_B04_SI00194_run1_MATK_R |
| Pinus | Pinus nigra J.F. Arnold | Pin-nig_B05_BDV01574_run1_MATK_F |
| Pinus | Pinus nigra J.F. Arnold | Pin-nig_B05_BDV01574_run1_MATK_R |
| Pinus | Pinus nigra J.F. Arnold | Pin-nig_C02_BDV01574_run1_MATK_F |
| Pinus | Pinus nigra J.F. Arnold | Pin-nig_C02_BDV01574_run1_MATK_R |
| Pinus | Pinus nigra J.F. Arnold | Pin-nig_C04_BDV01574_run1_MATK_F |
| Pinus | Pinus nigra J.F. Arnold | Pin-nig_C04_BDV01574_run1_MATK_R |
| Pinus | Pinus nigra J.F. Arnold | Pin-nig_C04_SI00194_run1_MATK_F |
| Pinus | Pinus nigra J.F. Arnold | Pin-nig_C04_SI00194_run1_MATK_R |
| Pinus | Pinus nigra J.F. Arnold | Pin-nig_C05_BDV01574_run1_MATK_F |
| Pinus | Pinus nigra J.F. Arnold | Pin-nig_C05_BDV01574_run1_MATK_R |
| Pinus | Pinus nigra J.F. Arnold | Pin-nig_D04_BDV01574_run1_MATK_F |
| Pinus | Pinus nigra J.F. Arnold | Pin-nig_D04_BDV01574_run1_MATK_R |
| Pinus | Pinus nigra J.F. Arnold | Pin-nig_D04_SI00194_run1_MATK_F |
| Pinus | Pinus nigra J.F. Arnold | Pin-nig_D04_SI00194_run1_MATK_R |
| Pinus | Pinus nigra J.F. Arnold | Pin-nig_E04_BDV01574_run1_MATK_F |
| Pinus | Pinus nigra J.F. Arnold | Pin-nig_E04_BDV01574_run1_MATK_R |
| Pinus | Pinus nigra J.F. Arnold | Pin-nig_E04_SI00194_run1_MATK_F |
| Pinus | Pinus nigra J.F. Arnold | Pin-nig_E04_SI00194_run1_MATK_R |
| Pinus | Pinus nigra J.F. Arnold | Pin-nig_F04_BDV01574_run1_MATK_F |
| Pinus | Pinus nigra J.F. Arnold | Pin-nig_F04_BDV01574_run1_MATK_R |
| Pinus | Pinus nigra J.F. Arnold | Pin-nig_F04_SI00194_run1_MATK_F |
| Pinus | Pinus nigra J.F. Arnold | Pin-nig_F04_SI00194_run1_MATK_R |
| Pinus | Pinus nigra J.F. Arnold | Pin-nig_F12_BDV01574_run1_MATK_F |
| Pinus | Pinus nigra J.F. Arnold | Pin-nig_F12_BDV01574_run1_MATK_R |
| Pinus | Pinus nigra J.F. Arnold | Pin-nig_F12_SI00194_run1_MATK_F |
| Pinus | Pinus nigra J.F. Arnold | Pin-nig_F12_SI00194_run1_MATK_R |
| Pinus | Pinus nigra J.F. Arnold | Pin-nig_G03_BDV01574_run1_MATK_F |
| Pinus | Pinus nigra J.F. Arnold | Pin-nig_G03_BDV01574_run1_MATK_R |
| Pinus | Pinus nigra J.F. Arnold | Pin-nig_G03_SI00194_run1_MATK_F |
| Pinus | Pinus nigra J.F. Arnold | Pin-nig_G03_SI00194_run1_MATK_R |
| Pinus | Pinus nigra J.F. Arnold | Pin-nig_G04_BDV01574_run1_MATK_F |
| Pinus | Pinus nigra J.F. Arnold | Pin-nig_G04_BDV01574_run1_MATK_R |
| Pinus | Pinus nigra J.F. Arnold | Pin-nig_G04_SI00194_run1_MATK_F |
| Pinus | Pinus nigra J.F. Arnold | Pin-nig_G04_SI00194_run1_MATK_R |
| Pinus | Pinus nigra J.F. Arnold | Pin-nig_G12_BDV01574_run1_MATK_F |
| Pinus | Pinus nigra J.F. Arnold | Pin-nig_G12_BDV01574_run1_MATK_R |
| Pinus | Pinus nigra J.F. Arnold | Pin-nig_G12_SI00194_run1_MATK_F |
| Pinus | Pinus nigra J.F. Arnold | Pin-nig_G12_SI00194_run1_MATK_R |
| Pinus | Pinus nigra J.F. Arnold | Pin-nig_H03_BDV01574_run1_MATK_F |
| Pinus | Pinus nigra J.F. Arnold | Pin-nig_H03_BDV01574_run1_MATK_R |
| Pinus | Pinus nigra J.F. Arnold | Pin-nig_H03_SI00194_run1_MATK_F |
| Pinus | Pinus nigra J.F. Arnold | Pin-nig_H03_SI00194_run1_MATK_R |
| Pinus | Pinus nigra J.F. Arnold | Pin-nig_H12_BDV01574_run1_MATK_F |
| Pinus | Pinus nigra J.F. Arnold | Pin-nig_H12_BDV01574_run1_MATK_R |
| Pinus | Pinus nigra J.F. Arnold | Pin-nig_H12_SI00194_run1_MATK_F |
| Pinus | Pinus nigra J.F. Arnold | Pin-nig_H12_SI00194_run1_MATK_R |
| Pinus | Pinus nigra J.F. Arnold | AB019854.1 |
| Pinus | Pinus nigra J.F. Arnold | AB084498.1 |
| Pinus | Pinus nigra J.F. Arnold | JN854179.1 |
| Pinus | Pinus nigra J.F. Arnold | JQ512469.1 |
| Pinus | Pinus nigra J.F. Arnold | DQ353717.1 |
| Pinus | Pinus nigra J.F. Arnold | HE966964.1 |
| Pinus | Pinus nigra J.F. Arnold | KP089195.1 |
| Pinus | Pinus pinaster Aiton | Pin-ptr_B11_BDV01574_run1_MATK_F |
| Pinus | Pinus pinaster Aiton | Pin-ptr_B11_BDV01574_run1_MATK_R |
| Pinus | Pinus pinaster Aiton | Pin-ptr_B11_SI00194_run1_MATK_F |
| Pinus | Pinus pinaster Aiton | Pin-ptr_B11_SI00194_run1_MATK_R |
| Pinus | Pinus pinaster Aiton | Pin-ptr_C08_BDV01575_run2_MATK_F |
| Pinus | Pinus pinaster Aiton | Pin-ptr_C08_BDV01575_run2_MATK_R |
| Pinus | Pinus pinaster Aiton | Pin-ptr_C11_BDV01574_run1_MATK_F |
| Pinus | Pinus pinaster Aiton | Pin-ptr_C11_BDV01574_run1_MATK_R |
| Pinus | Pinus pinaster Aiton | Pin-ptr_C11_SI00194_run1_MATK_F |
| Pinus | Pinus pinaster Aiton | Pin-ptr_C11_SI00194_run1_MATK_R |
| Pinus | Pinus pinaster Aiton | Pin-ptr_D08_BDV01575_run2_MATK_R |
| Pinus | Pinus pinaster Aiton | Pin-ptr_D11_BDV01574_run1_MATK_F |
| Pinus | Pinus pinaster Aiton | Pin-ptr_D11_BDV01574_run1_MATK_R |
| Pinus | Pinus pinaster Aiton | Pin-ptr_D11_SI00194_run1_MATK_F |
| Pinus | Pinus pinaster Aiton | Pin-ptr_D11_SI00194_run1_MATK_R |
| Pinus | Pinus pinaster Aiton | Pin-ptr_E08_BDV01575_run2_MATK_F |
| Pinus | Pinus pinaster Aiton | Pin-ptr_E08_BDV01575_run2_MATK_R |
| Pinus | Pinus pinaster Aiton | Pin-ptr_E11_BDV01574_run1_MATK_F |
| Pinus | Pinus pinaster Aiton | Pin-ptr_E11_BDV01574_run1_MATK_R |
| Pinus | Pinus pinaster Aiton | Pin-ptr_E11_SI00194_run1_MATK_R |
| Pinus | Pinus pinaster Aiton | AB019855.1 |
| Pinus | Pinus pinaster Aiton | AB084493.1 |
| Pinus | Pinus pinaster Aiton | FJ899583.2 |
| Pinus | Pinus pinea L. | Pin-pin_A12_BDV01574_run1_MATK_F |
| Pinus | Pinus pinea L. | Pin-pin_A12_BDV01574_run1_MATK_R |
| Pinus | Pinus pinea L. | Pin-pin_A12_SI00194_run1_MATK_F |
| Pinus | Pinus pinea L. | Pin-pin_A12_SI00194_run1_MATK_R |
| Pinus | Pinus pinea L. | Pin-pin_B12_BDV01574_run1_MATK_F |
| Pinus | Pinus pinea L. | Pin-pin_B12_BDV01574_run1_MATK_R |
| Pinus | Pinus pinea L. | Pin-pin_B12_SI00194_run1_MATK_F |
| Pinus | Pinus pinea L. | Pin-pin_B12_SI00194_run1_MATK_R |
| Pinus | Pinus pinea L. | Pin-pin_C11_BDV01575_run2_MATK_F |
| Pinus | Pinus pinea L. | Pin-pin_C11_BDV01575_run2_MATK_R |
| Pinus | Pinus pinea L. | Pin-pin_C12_BDV01574_run1_MATK_F |
| Pinus | Pinus pinea L. | Pin-pin_C12_BDV01574_run1_MATK_R |
| Pinus | Pinus pinea L. | Pin-pin_C12_SI00194_run1_MATK_F |
| Pinus | Pinus pinea L. | Pin-pin_C12_SI00194_run1_MATK_R |
| Pinus | Pinus pinea L. | Pin-pin_D12_BDV01574_run1_MATK_F |
| Pinus | Pinus pinea L. | Pin-pin_D12_BDV01574_run1_MATK_R |
| Pinus | Pinus pinea L. | Pin-pin_D12_SI00194_run1_MATK_R |
| Pinus | Pinus pinea L. | Pin-pin_E07_BDV01575_run2_MATK_F |
| Pinus | Pinus pinea L. | Pin-pin_E07_BDV01575_run2_MATK_R |
| Pinus | Pinus pinea L. | Pin-pin_E12_BDV01574_run1_MATK_F |
| Pinus | Pinus pinea L. | Pin-pin_E12_BDV01574_run1_MATK_R |
| Pinus | Pinus pinea L. | Pin-pin_E12_SI00194_run1_MATK_F |
| Pinus | Pinus pinea L. | Pin-pin_F11_BDV01574_run1_MATK_F |
| Pinus | Pinus pinea L. | Pin-pin_F11_SI00194_run1_MATK_F |
| Pinus | Pinus pinea L. | Pin-pin_F11_SI00194_run1_MATK_R |
| Pinus | Pinus pinea L. | Pin-pin_G11_BDV01574_run1_MATK_F |
| Pinus | Pinus pinea L. | Pin-pin_G11_BDV01574_run1_MATK_R |
| Pinus | Pinus pinea L. | Pin-pin_G11_SI00194_run1_MATK_F |
| Pinus | Pinus pinea L. | Pin-pin_G11_SI00194_run1_MATK_R |
| Pinus | Pinus pinea L. | Pin-pin_H11_BDV01574_run1_MATK_F |
| Pinus | Pinus pinea L. | Pin-pin_H11_BDV01574_run1_MATK_R |
| Pinus | Pinus pinea L. | AB019859.1 |
| Pinus | Pinus pinea L. | AB084496.1 |
| Pinus | Pinus pinea L. | JN854173.1 |
| Pinus | Pinus pinea L. | DQ353713.1 |
| Pinus | Pinus sylvestris L. | Pin-syl_B07_BDV01574_run1_MATK_F |
| Pinus | Pinus sylvestris L. | Pin-syl_B07_BDV01574_run1_MATK_R |
| Pinus | Pinus sylvestris L. | Pin-syl_B07_SI00194_run1_MATK_F |
| Pinus | Pinus sylvestris L. | Pin-syl_B07_SI00194_run1_MATK_R |
| Pinus | Pinus sylvestris L. | Pin-syl_C06_BDV01574_run1_MATK_F |
| Pinus | Pinus sylvestris L. | Pin-syl_C06_BDV01574_run1_MATK_R |
| Pinus | Pinus sylvestris L. | Pin-syl_C06_SI00194_run1_MATK_F |
| Pinus | Pinus sylvestris L. | Pin-syl_C06_SI00194_run1_MATK_R |
| Pinus | Pinus sylvestris L. | Pin-syl_D09_BDV01575_run2_MATK_F |
| Pinus | Pinus sylvestris L. | Pin-syl_D09_BDV01575_run2_MATK_R |
| Pinus | Pinus sylvestris L. | Pin-syl_E09_BDV01575_run2_MATK_F |
| Pinus | Pinus sylvestris L. | Pin-syl_E09_BDV01575_run2_MATK_R |
| Pinus | Pinus sylvestris L. | Pin-syl_F09_BDV01575_run2_MATK_F |
| Pinus | Pinus sylvestris L. | Pin-syl_F09_BDV01575_run2_MATK_R |
| Pinus | Pinus sylvestris L. | Pin-syl_H04_BDV01574_run1_MATK_F |
| Pinus | Pinus sylvestris L. | Pin-syl_H04_BDV01574_run1_MATK_R |
| Pinus | Pinus sylvestris L. | Pin-syl_H04_SI00194_run1_MATK_F |
| Pinus | Pinus sylvestris L. | Pin-syl_H04_SI00194_run1_MATK_R |
| Pinus | Pinus sylvestris L. | AB019846.1 |
| Pinus | Pinus sylvestris L. | AB084492.1 |
| Pinus | Pinus sylvestris L. | AB097781.1 |
| Pinus | Pinus sylvestris L. | KP089957.1 |
| Pinus | Pinus sylvestris L. | EU749481.1 |
| Pinus | Pinus sylvestris L. | EU749482.1 |
| Pinus | Pinus sylvestris L. | EU749483.1 |
| Pinus | Pinus uncinata Ramond ex DC. | Pin-unc_A05_BDV01574_run1_MATK_F |
| Pinus | Pinus uncinata Ramond ex DC. | Pin-unc_A05_BDV01574_run1_MATK_R |
| Pinus | Pinus uncinata Ramond ex DC. | Pin-unc_D06_BDV01574_run1_MATK_F |
| Pinus | Pinus uncinata Ramond ex DC. | Pin-unc_D06_BDV01574_run1_MATK_R |
| Pinus | Pinus uncinata Ramond ex DC. | Pin-unc_D06_SI00194_run1_MATK_F |
| Pinus | Pinus uncinata Ramond ex DC. | Pin-unc_D06_SI00194_run1_MATK_R |
| Pinus | Pinus uncinata Ramond ex DC. | AB097778.1 |
| Pistacia | Pistacia lentiscus L | KM527361.1 |
| Platanus | Platanus orientalis L. | AM396503.2 |
| Platanus | Platanus orientalis L. | JN114768.1 |
| Platanus | Platanus orientalis L. | KJ720969.1 |
| Platanus | Platanus orientalis L. | KP089208.1 |
| Populus | Populus alba L. | NC_008235. |
| Populus | Populus alba L. | NC_027425. |
| Populus | Populus alba L. | AP008956.1 |
| Populus | Populus alba L. | AM889739.1 |
| Populus | Populus alba L. | HM850925.1 |
| Populus | Populus alba L. | KC584937.1 |
| Populus | Populus alba L. | KF940864.1 |
| Populus | Populus alba L. | GQ248184.1 |
| Populus | Populus alba L. | KP089212.1 |
| Populus | Populus nigra L. | AB038186.1 |
| Populus | Populus nigra L. | HE967464.1 |
| Populus | Populus nigra L. | JN894480.1 |
| Populus | Populus nigra L. | JN895052.1 |
| Populus | Populus nigra L. | JN895053.1 |
| Populus | Populus nigra L. | HM850926.1 |
| Populus | Populus nigra L. | JF429914.1 |
| Populus | Populus nigra L. | KC584938.1 |
| Populus | Populus nigra L. | KF940875.1 |
| Populus | Populus nigra L. | JX495748.1 |
| Populus | Populus nigra L. | KC485120.1 |
| Populus | Populus nigra L. | KJ204525.1 |
| Populus | Populus tremula L. | AJ506082.1 |
| Populus | Populus tremula L. | AJ506083.1 |
| Populus | Populus tremula L. | AJ506084.1 |
| Populus | Populus tremula L. | AJ506085.1 |
| Populus | Populus tremula L. | AJ506086.1 |
| Populus | Populus tremula L. | AJ506087.1 |
| Populus | Populus tremula L. | AJ506088.1 |
| Populus | Populus tremula L. | KP861984.1 |
| Populus | Populus tremula L. | JN893927.1 |
| Populus | Populus tremula L. | JF429912.1 |
| Populus | Populus tremula L. | KF940884.1 |
| Prunus | Prunus avium L | HQ235111.1 |
| Prunus | Prunus avium L | HQ235112.1 |
| Prunus | Prunus avium L | JN895117.1 |
| Prunus | Prunus avium L | KP769274.1 |
| Prunus | Prunus avium L | HE966973.1 |
| Prunus | Prunus avium L | FJ395442.1 |
| Prunus | Prunus avium L | KP402265.1 |
| Prunus | Prunus avium L | KP402320.1 |
| Prunus | Prunus brigantina Vill. | HQ235115.1 |
| Prunus | Prunus cerasifera Ehrh. | KF154786.1 |
| Prunus | Prunus cerasifera Ehrh. | HQ235122.1 |
| Prunus | Prunus cerasifera Ehrh. | HQ235123.1 |
| Prunus | Prunus cerasifera Ehrh. | HQ235124.1 |
| Prunus | Prunus cerasifera Ehrh. | HQ235125.1 |
| Prunus | Prunus cerasifera Ehrh. | HQ619834.1 |
| Prunus | Prunus laurocerasus L | AF288116.1 |
| Prunus | Prunus laurocerasus L | FN668846.1 |
| Prunus | Prunus laurocerasus L | HQ235181.1 |
| Prunus | Prunus laurocerasus L | HQ619835.1 |
| Prunus | Prunus lusitanica L. | FJ899115.1 |
| Prunus | Prunus lusitanica L. | FJ899116.1 |
| Prunus | Prunus mahaleb L. | HQ235184.1 |
| Prunus | Prunus mahaleb L. | HQ235185.1 |
| Prunus | Prunus mahaleb L. | KP769309.1 |
| Prunus | Prunus mahaleb L. | KP769310.1 |
| Prunus | Prunus mahaleb L. | KP769311.1 |
| Prunus | Prunus mahaleb L. | KP769312.1 |
| Prunus | Prunus mahaleb L. | KP769313.1 |
| Prunus | Prunus mahaleb L. | KP769314.1 |
| Prunus | Prunus mahaleb L. | KP769315.1 |
| Prunus | Prunus padus L. | NC_026982. |
| Prunus | Prunus padus L. | HQ235215.1 |
| Prunus | Prunus padus L. | HQ235216.1 |
| Prunus | Prunus padus L. | JN894832.1 |
| Prunus | Prunus padus L. | JN895191.1 |
| Prunus | Prunus padus L. | JN895843.1 |
| Prunus | Prunus padus L. | KP760072.1 |
| Prunus | Prunus padus L. | KP769258.1 |
| Prunus | Prunus padus L. | KP769142.1 |
| Prunus | Prunus padus L. | KP769143.1 |
| Prunus | Prunus padus L. | GU363752.1 |
| Prunus | Prunus padus L. | KP089229.1 |
| Prunus | Prunus webbii (Spach) Vierh. | HQ235312.1 |
| Pyrus | Pyrus pyraster (L.) Burgsd. | JN894988.1 |
| Pyrus | Pyrus pyraster (L.) Burgsd. | JN895841.1 |
| Pyrus | Pyrus pyraster (L.) Burgsd. | DQ860473.1 |
| Pyrus | Pyrus pyraster (L.) Burgsd. | JQ391044.1 |
| Pyrus | Pyrus spinosa Forssk. | NC_023130. |
| Pyrus | Pyrus spinosa Forssk. | HG737342.1 |
| Pyrus | Pyrus syriaca Boiss. | JQ391047.1 |
| Quercus | Quercus alnifolia Poech | KP301144.1 |
| Quercus | Quercus crenata Lam. | FN675334.1 |
| Quercus | Quercus crenata Lam. | FN675338.1 |
| Quercus | Quercus crenata Lam. | FN675339.1 |
| Quercus | Quercus frainetto Ten. | FN675322.1 |
| Quercus | Quercus frainetto Ten. | FN675329.1 |
| Quercus | Quercus frainetto Ten. | FN675330.1 |
| Quercus | Quercus petraea (Mattusch.) Liebl | FN675321.1 |
| Quercus | Quercus petraea (Mattusch.) Liebl | FN675327.1 |
| Quercus | Quercus petraea (Mattusch.) Liebl | HE966979.1 |
| Quercus | Quercus pubescens Willd. | HE966980.1 |
| Quercus | Quercus robur L. | FN675319.1 |
| Quercus | Quercus robur L. | FN675323.1 |
| Quercus | Quercus robur L. | HQ619812.1 |
| Quercus | Quercus robur L. | FJ185056.1 |
| Rhamnus | Rhamnus catharticus L. | JN894694.1 |
| Rhamnus | Rhamnus catharticus L. | JN895855.1 |
| Rhamnus | Rhamnus catharticus L. | AY257533.1 |
| Rhamnus | Rhamnus catharticus L. | EU749369.1 |
| Rhamnus | Rhamnus catharticus L. | EU749370.1 |
| Rhamnus | Rhamnus catharticus L. | EU749371.1 |
| Rhamnus | Rhamnus catharticus L. | EU749372.1 |
| Rhamnus | Rhamnus catharticus L. | HQ593408.1 |
| Rhamnus | Rhamnus catharticus L. | KJ593085.1 |
| Rhamnus | Rhamnus catharticus L. | KJ593086.1 |
| Rhamnus | Rhamnus catharticus L. | KJ593087.1 |
| Rhamnus | Rhamnus catharticus L. | KJ593088.1 |
| Rhododendron | Rhododendron ponticum L. | AY494172.1 |
| Salix | Salix alba L. | AJ849588.1 |
| Salix | Salix alba L. | KX016117.1 |
| Salix | Salix alba L. | KX016118.1 |
| Salix | Salix alba L. | KX016119.1 |
| Salix | Salix alba L. | JN894322.1 |
| Salix | Salix alba L. | JN895050.1 |
| Salix | Salix alba L. | EU790677.1 |
| Salix | Salix alba L. | HQ593425.1 |
| Salix | Salix alba L. | KC415379.1 |
| Salix | Salix alba L. | KJ204532.1 |
| Salix | Salix alba L. | GU373360.1 |
| Salix | Salix alba L. | KM001954.1 |
| Salix | Salix caprea L. | HE820974.1 |
| Salix | Salix caprea L. | FR695023.1 |
| Salix | Salix caprea L. | JN893911.1 |
| Salix | Salix caprea L. | JN894890.1 |
| Salix | Salix caprea L. | JN895049.1 |
| Salix | Salix caprea L. | KX016155.1 |
| Salix | Salix caprea L. | KX016156.1 |
| Salix | Salix caprea L. | KJ204533.1 |
| Salix | Salix cinerea L. | JN894891.1 |
| Salix | Salix cinerea L. | JN895010.1 |
| Salix | Salix cinerea L. | JN895668.1 |
| Salix | Salix cinerea L. | KX016164.1 |
| Salix | Salix cinerea L. | KX016165.1 |
| Salix | Salix elaeagnos Scop. | KX016180.1 |
| Salix | Salix elaeagnos Scop. | KX016181.1 |
| Salix | Salix elaeagnos Scop. | KM002120.1 |
| Salix | Salix fragilis L. | AJ849589.1 |
| Salix | Salix fragilis L. | JN894892.1 |
| Salix | Salix fragilis L. | JN894893.1 |
| Salix | Salix pedicellata Desf. | KM002074.1 |
| Salix | Salix pentandra L. | AJ849590.1 |
| Salix | Salix pentandra L. | JN893907.1 |
| Salix | Salix pentandra L. | JN894895.1 |
| Salix | Salix pentandra L. | JN894896.1 |
| Salix | Salix pentandra L. | KX016258.1 |
| Salix | Salix pentandra L. | KX016259.1 |
| Salix | Salix pentandra L. | EU790684.1 |
| Salix | Salix pentandra L. | EU790685.1 |
| Salix | Salix pentandra L. | KC415416.1 |
| Salix | Salix pentandra L. | KM002277.1 |
| Salix | Salix purpurea L | NC_026722. |
| Salix | Salix purpurea L | KP019639.1 |
| Salix | Salix purpurea L | JN893908.1 |
| Salix | Salix purpurea L | JN894734.1 |
| Salix | Salix purpurea L | JN894735.1 |
| Salix | Salix purpurea L | KX016273.1 |
| Salix | Salix purpurea L | KX016274.1 |
| Salix | Salix purpurea L | KX016275.1 |
| Salix | Salix purpurea L | AY669057.1 |
| Salix | Salix triandra L. | AJ849591.1 |
| Salix | Salix triandra L. | KJ101480.1 |
| Salix | Salix triandra L. | JN893912.1 |
| Salix | Salix triandra L. | JN894738.1 |
| Salix | Salix triandra L. | KX016310.1 |
| Salix | Salix triandra L. | KC584942.1 |
| Salix | Salix triandra L. | KF940891.1 |
| Salix | Salix triandra L. | EU790687.1 |
| Salix | Salix triandra L. | KC415428.1 |
| Salix | Salix viminalis L. | AJ849594.1 |
| Salix | Salix viminalis L. | JN893913.1 |
| Salix | Salix viminalis L. | JN894736.1 |
| Salix | Salix viminalis L. | JN894737.1 |
| Salix | Salix viminalis L. | KX016319.1 |
| Salix | Salix viminalis L. | KX016320.1 |
| Salix | Salix viminalis L. | KM002476.1 |
| Sambucus | Sambucus nigra L. | FN668836.1 |
| Sambucus | Sambucus nigra L. | HE967483.1 |
| Sambucus | Sambucus nigra L. | JN895393.1 |
| Sambucus | Sambucus nigra L. | JN895400.1 |
| Sambucus | Sambucus nigra L. | JN896163.1 |
| Sambucus | Sambucus nigra L. | FJ395429.1 |
| Sambucus | Sambucus nigra L. | JQ412285.1 |
| Sambucus | Sambucus racemosa L. | FN668835.1 |
| Sambucus | Sambucus racemosa L. | AF446898.1 |
| Sambucus | Sambucus racemosa L. | HQ714381.1 |
| Sambucus | Sambucus racemosa L. | HQ593430.1 |
| Sambucus | Sambucus racemosa L. | KJ593099.1 |
| Sambucus | Sambucus racemosa L. | KP210422.1 |
| Sambucus | Sambucus racemosa L. | HQ714378.1 |
| Sambucus | Sambucus racemosa L. | HQ714379.1 |
| Searsia | **Searsia tomentosa (L.) F.A.Barkley** | KP110144.1 |
| Sorbus | Sorbus aria (L.) Crantz | AM889746.1 |
| Sorbus | Sorbus aria (L.) Crantz | JN894456.1 |
| Sorbus | Sorbus aria (L.) Crantz | JN894460.1 |
| Sorbus | Sorbus aria (L.) Crantz | JN895195.1 |
| Sorbus | Sorbus aria (L.) Crantz | GQ248202.1 |
| Sorbus | Sorbus aucuparia L. | JN895858.1 |
| Sorbus | Sorbus aucuparia L. | JN895859.1 |
| Sorbus | Sorbus aucuparia L. | JN896162.1 |
| Sorbus | Sorbus aucuparia L. | HQ593455.1 |
| Sorbus | Sorbus domestica L. | HE967002.1 |
| Sorbus | Sorbus domestica L. | JN894272.1 |
| Sorbus | Sorbus domestica L. | JN894461.1 |
| Sorbus | Sorbus domestica L. | JN895827.1 |
| Sorbus | Sorbus torminalis (L.) Crantz | HE967495.1 |
| Sorbus | Sorbus torminalis (L.) Crantz | JN894654.1 |
| Sorbus | Sorbus torminalis (L.) Crantz | JN895323.1 |
| Sorbus | Sorbus torminalis (L.) Crantz | AF309198.1 |
| Spartium | Spartium junceum L. | HM851134.1 |
| Spartium | Spartium junceum L. | AY386901.1 |
| Staphylea | Staphylea pinnata L. | AF542582.1 |
| Styrax | Styrax officinalis L. | AJ429300.1 |
| Styrax | Styrax officinalis L. | DQ924099.1 |
| Tamarix | Tamarix africana Poiret | HM851066.1 |
| Tamarix | Tamarix gallica L. | AF204861.1 |
| Tamarix | Tamarix gallica L. | KC584947.1 |
| Tamarix | Tamarix passerinoides Del. ex Desf. | KC840665.1 |
| Tamarix | Tamarix passerinoides Del. ex Desf. | KC840666.1 |
| Taxus | Taxus baccata L. | Tax-bac_B12_BDV01575_run2_MATK_F |
| Taxus | Taxus baccata L. | Tax-bac_B12_BDV01575_run2_MATK_R |
| Taxus | Taxus baccata L. | Tax-bac_E11_BDV01575_run2_MATK_F |
| Taxus | Taxus baccata L. | Tax-bac_E11_BDV01575_run2_MATK_R |
| Taxus | Taxus baccata L. | Tax-bac_F11_BDV01575_run2_MATK_F |
| Taxus | Taxus baccata L. | Tax-bac_F11_BDV01575_run2_MATK_R |
| Taxus | Taxus baccata L. | Tax-bac_G11_BDV01575_run2_MATK_F |
| Taxus | Taxus baccata L. | Tax-bac_G11_BDV01575_run2_MATK_R |
| Taxus | Taxus baccata L. | HE967498.1 |
| Taxus | Taxus baccata L. | JN895853.1 |
| Taxus | Taxus baccata L. | JN895854.1 |
| Taxus | Taxus baccata L. | JX174675.1 |
| Taxus | Taxus baccata L. | JX174676.1 |
| Taxus | Taxus baccata L. | JX174677.1 |
| Taxus | Taxus baccata L. | JX174678.1 |
| Taxus | Taxus baccata L. | JX174679.1 |
| Taxus | Taxus baccata L. | JX174680.1 |
| Taxus | Taxus baccata L. | JX174681.1 |
| Taxus | Taxus baccata L. | JX174682.1 |
| Taxus | Taxus baccata L. | JX174683.1 |
| Taxus | Taxus baccata L. | DQ478791.1 |
| Taxus | Taxus baccata L. | HM591017.1 |
| Taxus | Taxus baccata L. | HM591018.1 |
| Taxus | Taxus baccata L. | HM591020.1 |
| Taxus | Taxus baccata L. | HM591021.1 |
| Taxus | Taxus baccata L. | KP089332.1 |
| Tetraclinis | Tetraclinis articulata (Vahl) Masters | HM024068.1 |
| Tetraclinis | Tetraclinis articulata (Vahl) Masters | HQ245913.1 |
| Tilia | Tilia cordata Miller | HE967502.1 |
| Tilia | Tilia cordata Miller | JN894141.1 |
| Tilia | Tilia cordata Miller | JN894340.1 |
| Tilia | Tilia cordata Miller | JN894342.1 |
| Tilia | Tilia cordata Miller | JN896030.1 |
| Tilia | Tilia cordata Miller | KP089341.1 |
| Tilia | Tilia cordata Miller | KP089342.1 |
| Tilia | Tilia platyphyllos Scop. | JN894338.1 |
| Tilia | Tilia platyphyllos Scop. | JN894341.1 |
| Tilia | Tilia platyphyllos Scop. | KP089345.1 |
| Tilia | Tilia platyphyllos Scop. | KP089346.1 |
| Ulmus | Ulmus glabra Hudson | KX230023.1 |
| Ulmus | Ulmus glabra Hudson | JN895595.1 |
| Ulmus | Ulmus glabra Hudson | JN895720.1 |
| Ulmus | Ulmus glabra Hudson | JN896191.1 |
| Ulmus | Ulmus glabra Hudson | KC539629.1 |
| Ulmus | Ulmus laevis Pallas | HE970750.1 |
| Ulmus | Ulmus laevis Pallas | KC539633.1 |
| Ulmus | Ulmus laevis Pallas | KP089351.1 |
| Ulmus | Ulmus minor Mill. | JN895764.1 |
| Ulmus | Ulmus minor Mill. | JN895917.1 |
| Ulmus | Ulmus minor Mill. | KC584949.1 |
| Ulmus | Ulmus minor Mill. | KC539627.1 |
| Ulmus | Ulmus minor Mill. | KJ204554.1 |
| Ulmus | Ulmus procera Salisb. | JN894259.1 |
| Ulmus | Ulmus procera Salisb. | JN895918.1 |
| Ulmus | Ulmus procera Salisb. | AF400591.1 |
| Ulmus | Ulmus procera Salisb. | HM851106.1 |
| Ulmus | Ulmus procera Salisb. | JN894246.1 |
| Vitex | Vitex agnus-castus L. | AB284182.1 |
| Vitex | Vitex agnus-castus L. | HQ384496.1 |
| Zelkova | **Zelkova serrata (Thunb.) Makino** | AP017905.1 |

**Appendix S4-2.** Genus and species sequence description for *rbcL* (non-Mediterranean species appear in bold). Sequence codes include published NCBI references (starting with a two-letter code) and our own (starting with a six-letter code for INRA and with CNR of the CNR sequences).

| **Genus** | **Species** | **Sequence reference code** |
| --- | --- | --- |
| Abies | Abies alba Mill. | FR831927.1 |
| Abies | Abies alba Mill. | FR831928.1 |
| Abies | Abies alba Mill. | FR831929.1 |
| Abies | Abies alba Mill. | HQ619762.1 |
| Abies | Abies alba Mill. | AB029652.1 |
| Abies | Abies alba Mill. | Abi-alb_A03_SI00193_run1_Rbcl_F |
| Abies | Abies alba Mill. | Abi-alb_A03_SI00193_run1_Rbcl_R |
| Abies | Abies alba Mill. | Abi-alb_A07_SI00685_run2_Rbcl_F |
| Abies | Abies alba Mill. | Abi-alb_A07_SI00685_run2_Rbcl_R |
| Abies | Abies alba Mill. | Abi-alb_D12_SI00685_run2_Rbcl_F |
| Abies | Abies alba Mill. | Abi-alb_D12_SI00685_run2_Rbcl_R |
| Abies | Abies alba Mill. | Abi-alb_E05_SI00193_run1_Rbcl_F |
| Abies | Abies alba Mill. | Abi-alb_E05_SI00193_run1_Rbcl_R |
| Abies | Abies alba Mill. | Abi-alb_E12_SI00685_run2_Rbcl_F |
| Abies | Abies alba Mill. | Abi-alb_E12_SI00685_run2_Rbcl_R |
| Abies | Abies alba Mill. | Abi-alb_F12_SI00685_run2_Rbcl_F |
| Abies | Abies alba Mill. | Abi-alb_F12_SI00685_run2_Rbcl_R |
| Abies | Abies alba Mill. | Abi-alb_G12_SI00685_run2_Rbcl_F |
| Abies | Abies alba Mill. | Abi-alb_G12_SI00685_run2_Rbcl_R |
| Abies | Abies alba Mill. | Abi-alb_H06_SI00685_run2_Rbcl_F |
| Abies | Abies alba Mill. | Abi-alb_H06_SI00685_run2_Rbcl_R |
| Abies | Abies cephalonica Loudon | FR831931.1 |
| Abies | Abies nebrodensis (Lojac.) Mattei | AB029653.1 |
| Abies | Abies nebrodensis (Lojac.) Mattei | FR831930.1 |
| Abies | Abies nebrodensis (Lojac.) Mattei | Abi-neb_C12_SI00685_run2_Rbcl_F |
| Abies | Abies nebrodensis (Lojac.) Mattei | Abi-neb_C12_SI00685_run2_Rbcl_R |
| Abies | Abies pinsapo Boiss. | FR831932.1 |
| Abies | Abies pinsapo Boiss. | AB029656.1 |
| Abies | Abies pinsapo Boiss. | JN935617.1 |
| Abies | Abies pinsapo Boiss. | Abi-pin_C12_BDV01579_run4_Rbcl_F |
| Abies | Abies pinsapo Boiss. | Abi-pin_C12_BDV01579_run4_Rbcl_R |
| Abies | Abies pinsapo Boiss. | Abi-pin_D05_SI00193_run1_Rbcl_F |
| Abies | Abies pinsapo Boiss. | Abi-pin_D05_SI00193_run1_Rbcl_R |
| Abies | Abies pinsapo Boiss. | Abi-pin_D12_BDV01579_run4_Rbcl_F |
| Abies | Abies pinsapo Boiss. | Abi-pin_D12_BDV01579_run4_Rbcl_R |
| Acer | Acer campestre L. | FN689361.1 |
| Acer | Acer campestre L. | JN890783.1 |
| Acer | Acer campestre L. | JN892105.1 |
| Acer | Acer campestre L. | JN892112.1 |
| Acer | Acer campestre L. | HE963303.1 |
| Acer | Acer campestre L. | DQ978399.1 |
| Acer | Acer campestre L. | KM360609.1 |
| Acer | Acer campestre L. | Ace-cam_A02_BDV00322_run4_Rbcl_F |
| Acer | Acer campestre L. | Ace-cam_A02_BDV01579_run4_Rbcl_R |
| Acer | Acer monspessulanum L. | FN689377.1 |
| Acer | Acer monspessulanum L. | HE963304.1 |
| Acer | Acer monspessulanum L. | Ace-mon_F03_BDV00322_run4_Rbcl_F |
| Acer | Acer monspessulanum L. | Ace-mon_F03_BDV01579_run4_Rbcl_F |
| Acer | Acer monspessulanum L. | Ace-mon_F03_BDV01579_run4_Rbcl_R |
| Acer | Acer opalus Mill. | DQ978420.1 |
| Acer | Acer opalus Mill. | FN689359.1 |
| Acer | Acer opalus Mill. | Ace-opa_E02_BDV00322_run4_Rbcl_F |
| Acer | Acer opalus Mill. | Ace-opa_E02_BDV01579_run4_Rbcl_F |
| Acer | Acer opalus Mill. | Ace-opa_E02_BDV01579_run4_Rbcl_R |
| Acer | Acer platanoides L. | FN689356.1 |
| Acer | Acer platanoides L. | DQ978424.1 |
| Acer | Acer platanoides L. | EU676888.1 |
| Acer | Acer platanoides L. | EU676889.1 |
| Acer | Acer platanoides L. | Ace-pla_B02_BDV00322_run4_Rbcl_F |
| Acer | Acer platanoides L. | Ace-pla_B02_BDV01579_run4_Rbcl_F |
| Acer | Acer platanoides L. | Ace-pla_B02_BDV01579_run4_Rbcl_R |
| Acer | Acer pseudoplatanus L. | DQ978425.1 |
| Acer | Acer pseudoplatanus L. | FJ395591.1 |
| Acer | Acer pseudoplatanus L. | FN689357.1 |
| Acer | Acer pseudoplatanus L. | HE963306.1 |
| Acer | Acer pseudoplatanus L. | HM849739.1 |
| Acer | Acer pseudoplatanus L. | KJ204286.1 |
| Acer | Acer tataricum L. | JF940633.1 |
| Acer | Acer tataricum L. | JF940634.1 |
| Acer | Acer tataricum L. | JF940635.1 |
| Aesculus | Aesculus hippocastanum L. | AB872567.1 |
| Aesculus | Aesculus hippocastanum L. | HE963308.1 |
| Aesculus | Aesculus hippocastanum L. | HG765031.1 |
| Aesculus | Aesculus hippocastanum L. | HG765032.1 |
| Aesculus | Aesculus hippocastanum L. | HG765033.1 |
| Aesculus | Aesculus hippocastanum L. | KM360616.1 |
| Aesculus | Aesculus hippocastanum L. | Aes-hip_D10_BDV00318_run3_Rbcl_F |
| Aesculus | Aesculus hippocastanum L. | Aes-hip_D10_BDV01578_run3_Rbcl_F |
| Aesculus | Aesculus hippocastanum L. | Aes-hip_D10_BDV01578_run3_Rbcl_R |
| Alnus | Alnus cordata (Loisel.) Loisel. | Aln-cor_F07_BDV00322_run4_Rbcl_F |
| Alnus | Alnus glutinosa (L.) Gaertn. | FJ423675.1 |
| Alnus | Alnus glutinosa (L.) Gaertn. | FN689372.1 |
| Alnus | Alnus glutinosa (L.) Gaertn. | JN890945.1 |
| Alnus | Alnus glutinosa (L.) Gaertn. | JN893290.1 |
| Alnus | Alnus glutinosa (L.) Gaertn. | JN893730.1 |
| Alnus | Alnus glutinosa (L.) Gaertn. | HE574600.1 |
| Alnus | Alnus glutinosa (L.) Gaertn. | HE574601.1 |
| Alnus | Alnus glutinosa (L.) Gaertn. | EU644678.1 |
| Alnus | Alnus glutinosa (L.) Gaertn. | KF418927.1 |
| Alnus | Alnus glutinosa (L.) Gaertn. | KM360625.1 |
| Alnus | Alnus glutinosa (L.) Gaertn. | FJ844574.1 |
| Alnus | Alnus glutinosa (L.) Gaertn. | KT695533.1 |
| Alnus | Alnus incana (L.) Moench | X56618.1 |
| Alnus | Alnus incana (L.) Moench | KJ204296.1 |
| Alnus | Alnus incana (L.) Moench | KJ593202.1 |
| Alnus | Alnus incana (L.) Moench | KJ593203.1 |
| Alnus | Alnus incana atpB-rb | FJ423677.1 |
| Alnus | Alnus incana ribulos | HM849757.1 |
| Alnus | Alnus orientalis Decne. | KF418932.1 |
| Alnus | Alnus orientalis Decne. | FJ844582.1 |
| Alnus | Alnus viridis | FJ844588.1 |
| Arbutus | Arbutus unedo L. | JQ067650.2 |
| Arbutus | Arbutus unedo L. | KF997388.1 |
| Arbutus | Arbutus unedo L. | Arb-une_E07_BDV00322_run4_Rbcl_F |
| Betulla | Betula pendula Roth | FJ423684.1 |
| Betulla | Betula pendula Roth | JN892352.1 |
| Betulla | Betula pendula Roth | JN892378.1 |
| Betulla | Betula pendula Roth | JN892640.1 |
| Betulla | Betula pendula Roth | JN893300.1 |
| Betulla | Betula pendula Roth | KF418943.1 |
| Betulla | Betula pendula Roth | KM360670.1 |
| Betulla | Betula pendula Roth | GQ248556.1 |
| Betulla | Betula pendula Roth | GU373382.1 |
| Betulla | Betula pendula Roth | KJ204305.1 |
| Betulla | Betula pubescens Ehrh. | JN893073.1 |
| Betulla | Betula pubescens Ehrh. | JN893280.1 |
| Betulla | Betula pubescens Ehrh. | JN893289.1 |
| Betulla | Betula pubescens Ehrh. | JN893293.1 |
| Buxus | Buxus balearica Lam. | HE963365.1 |
| Buxus | Buxus sempervirens L. | HQ619741.1 |
| Buxus | Buxus sempervirens L. | HE963366.1 |
| Buxus | Buxus sempervirens L. | HE963367.1 |
| Buxus | Buxus sempervirens L. | HE963368.1 |
| Buxus | Buxus sempervirens L. | AF543712.1 |
| Buxus | Buxus sempervirens L. | HM849831.1 |
| Buxus | Buxus sempervirens L. | KM360684.1 |
| Buxus | Buxus sempervirens L. | Bux-sem_A08_BDV01578_run3_Rbcl_F |
| Buxus | Buxus sempervirens L. | Bux-sem_A08_BDV01578_run3_Rbcl_R |
| Buxus | Buxus sempervirens L. | Bux-sem_F10_BDV00318_run3_Rbcl_F |
| Buxus | Buxus sempervirens L. | Bux-sem_F10_BDV01578_run3_Rbcl_F |
| Buxus | Buxus sempervirens L. | Bux-sem_F10_BDV01578_run3_Rbcl_R |
| Carpinus | Carpinus betulus L. | FJ423640.1 |
| Carpinus | Carpinus betulus L. | JN892644.1 |
| Carpinus | Carpinus betulus L. | JN893226.1 |
| Carpinus | Carpinus betulus L. | JN893788.1 |
| Carpinus | Carpinus betulus L. | HF567847.1 |
| Carpinus | Carpinus betulus L. | AY263928.1 |
| Carpinus | Carpinus betulus L. | KM360696.1 |
| Carpinus | Carpinus betulus L. | Car-bet_C02_BDV00322_run4_Rbcl_F |
| Carpinus | Carpinus orientalis Mill. | FJ423648.1 |
| Carpinus | Carpinus orientalis Mill. | HE963386.1 |
| Carpinus | Carpinus orientalis Mill. | KF418947.1 |
| Castanea | Castanea sativa Mill. | M94936.1 |
| Castanea | Castanea sativa Mill. | AY548965.1 |
| Castanea | Castanea sativa Mill. | FN689363.1 |
| Castanea | Castanea sativa Mill. | JN892816.1 |
| Castanea | Castanea sativa Mill. | HE963387.1 |
| Castanea | Castanea sativa Mill. | AF500363.1 |
| Castanea | Castanea sativa Mill. | KM360699.1 |
| Castanea | Castanea sativa Mill. | Cas-sat_G02_BDV00322_run4_Rbcl_F |
| Cedrus | Cedrus libani A. Richard | HG765043.1 |
| Cedrus | Cedrus libani A. Richard | HG765044.1 |
| Cedrus | Cedrus libani A. Richard | HG765045.1 |
| Cedrus | Cedrus libani A. Richard | Ced-lib_A08_SI00193_run1_Rbcl_F |
| Cedrus | Cedrus libani A. Richard | Ced-lib_A08_SI00193_run1_Rbcl_R |
| Cedrus | Cedrus libani A. Richard | Ced-lib_E07_SI00193_run1_Rbcl_F |
| Cedrus | Cedrus libani A. Richard | Ced-lib_E07_SI00193_run1_Rbcl_R |
| Cedrus | Cedrus libani A. Richard | Ced-lib_F07_SI00193_run1_Rbcl_F |
| Cedrus | Cedrus libani A. Richard | Ced-lib_F07_SI00193_run1_Rbcl_R |
| Cedrus | Cedrus libani A. Richard | Ced-lib_G07_SI00193_run1_Rbcl_F |
| Cedrus | Cedrus libani A. Richard | Ced-lib_G07_SI00193_run1_Rbcl_R |
| Cedrus | Cedrus libani A. Richard | Ced-lib_H07_SI00193_run1_Rbcl_F |
| Cedrus | Cedrus libani A. Richard | Ced-lib_H07_SI00193_run1_Rbcl_R |
| Celtis | Celtis australis L. | HE963395.1 |
| Celtis | Celtis australis L. | Cel-aus_H05_BDV00318_run3_Rbcl_F |
| Celtis | Celtis australis L. | Cel-aus_H05_BDV01578_run3_Rbcl_F |
| Celtis | Celtis australis L. | Cel-aus_H05_BDV01578_run3_Rbcl_R |
| Celtis | Celtis tournefortii Lam. | JN040403.1 |
| Ceratonia | Ceratonia siliqua L. | KJ468096.1 |
| Ceratonia | Ceratonia siliqua L. | U74203.1 |
| Ceratonia | Ceratonia siliqua L. | JX571801.1 |
| Ceratonia | Ceratonia siliqua L. | Z70165.1 |
| Ceratonia | Ceratonia siliqua L. | Cer-sil_G06_BDV00318_run3_Rbcl_F |
| Cercis | Cercis siliquastrum L. | HE963398.1 |
| Cercis | Cercis siliquastrum L. | Z70164.1 |
| Chamaerops | Chamaerops humilis L. | AJ404754.1 |
| Chamaerops | Chamaerops humilis L. | AY012456.1 |
| Chamaerops | Chamaerops humilis L. | HM849886.1 |
| Corylus | Corylus avellana L. | FJ423655.1 |
| Corylus | Corylus avellana L. | JN890946.1 |
| Corylus | Corylus avellana L. | JN891389.1 |
| Corylus | Corylus avellana L. | JN891390.1 |
| Corylus | Corylus avellana L. | JN892134.1 |
| Corylus | Corylus avellana L. | JN893317.1 |
| Corylus | Corylus avellana L. | FR865138.1 |
| Corylus | Corylus avellana L. | AY263929.1 |
| Corylus | Corylus avellana L. | HM849918.1 |
| Corylus | Corylus avellana L. | KJ204323.1 |
| Corylus | Corylus avellana L. | Cor-ave_E01_BDV00322_run4_Rbcl_F |
| Corylus | Corylus colurna L. | FJ423657.1 |
| Corylus | Corylus colurna L. | KF418951.1 |
| Cotinus | Cotinus coggygria Scop. | AY510148.1 |
| Cotinus | Cotinus coggygria Scop. | HE963431.1 |
| Cotinus | Cotinus coggygria Scop. | KP088547.1 |
| Cotinus | Cotinus coggygria Scop. | MF349350.1 |
| Cotoneaster | **Cotoneaster franchetii Bois** | KY419994.1 |
| Crataegus | Crataegus monogyna Jacq. | FN689370.1 |
| Crataegus | Crataegus monogyna Jacq. | HG765050.1 |
| Crataegus | Crataegus monogyna Jacq. | HG765051.1 |
| Crataegus | Crataegus monogyna Jacq. | HG765052.1 |
| Crataegus | Crataegus monogyna Jacq. | KC206669.1 |
| Crataegus | Crataegus monogyna Jacq. | KC251339.1 |
| Crataegus | Crataegus monogyna Jacq. | KC251340.1 |
| Crataegus | Crataegus monogyna Jacq. | KC251341.1 |
| Crataegus | Crataegus monogyna Jacq. | KC251342.1 |
| Crataegus | Crataegus monogyna Jacq. | KJ746209.1 |
| Crataegus | Crataegus monogyna Jacq. | KM360737.1 |
| Crataegus | Crataegus monogyna Jacq. | Cra-mon_B05_BDV00318_run3_Rbcl_F |
| Crataegus | Crataegus monogyna Jacq. | Cra-mon_H10_BDV00318_run3_Rbcl_F |
| Crataegus | Crataegus pentagyna Willd. | KC206630.1 |
| Crataegus | Crataegus pentagyna Willd. | KC206641.1 |
| Crataegus | Crataegus pentagyna Willd. | KC206668.1 |
| Crataegus | Crataegus pentagyna Willd. | KC251360.1 |
| Crataegus | Crataegus pentagyna Willd. | KC251361.1 |
| Crataegus | Crataegus pentagyna Willd. | KC251362.1 |
| Crataegus | Crataegus pentagyna Willd. | KC251363.1 |
| Cupressus | Cupressus sempervirens L. | FN689378.1 |
| Cupressus | Cupressus sempervirens L. | FR831940.1 |
| Cupressus | Cupressus sempervirens L. | FR831941.1 |
| Cupressus | Cupressus sempervirens L. | FR831942.1 |
| Cupressus | Cupressus sempervirens L. | HE963440.1 |
| Cupressus | Cupressus sempervirens L. | HM024278.1 |
| Cupressus | Cupressus sempervirens L. | JX571816.1 |
| Cupressus | Cupressus sempervirens L. | NC_026296.1 |
| Cupressus | Cupressus sempervirens L. | Cup-sem_D01_SI00685_run2_Rbcl_F |
| Cupressus | Cupressus sempervirens L. | Cup-sem_D01_SI00685_run2_Rbcl_R |
| Cupressus | Cupressus sempervirens L. | Cup-sem_D03_SI00685_run2_Rbcl_F |
| Cupressus | Cupressus sempervirens L. | Cup-sem_D03_SI00685_run2_Rbcl_R |
| Cupressus | Cupressus sempervirens L. | Cup-sem_E03_SI00685_run2_Rbcl_F |
| Cupressus | Cupressus sempervirens L. | Cup-sem_E03_SI00685_run2_Rbcl_R |
| Cupressus | Cupressus sempervirens L. | Cup-sem_F03_SI00685_run2_Rbcl_F |
| Cupressus | Cupressus sempervirens L. | Cup-sem_F03_SI00685_run2_Rbcl_R |
| Cupressus | Cupressus sempervirens L. | Cup-sem_G03_SI00685_run2_Rbcl_F |
| Cupressus | Cupressus sempervirens L. | Cup-sem_G03_SI00685_run2_Rbcl_R |
| Cytisus | **Cytisus scoparius subsp. Scoparius** | KM360746.1 |
| Erica | Erica arborea L. | KP737710.1 |
| Fagus | Fagus orientalis Lipsky | KF418911.1 |
| Fagus | Fagus sylvatica L. | FN689362.1 |
| Fagus | Fagus sylvatica L. | JN891182.1 |
| Fagus | Fagus sylvatica L. | JN891396.1 |
| Fagus | Fagus sylvatica L. | JN891655.1 |
| Ficus | Ficus carica L. | GU935063.1 |
| Ficus | Ficus carica L. | GU935064.1 |
| Ficus | Ficus carica L. | Fic-car_H06_BDV00318_run3_Rbcl_F |
| Ficus | Ficus carica L. | HE963487.1 |
| Ficus | Ficus carica L. | HM850004.1 |
| Ficus | Ficus carica L. | KC584880.1 |
| Ficus | Ficus carica L. | KM360784.1 |
| Ficus | Ficus carica L. | JQ412365.1 |
| Ficus | Ficus carica L. | JQ773660.1 |
| Ficus | Ficus carica L. | JQ773661.1 |
| Ficus | Ficus carica L. | KP088598.1 |
| Ficus | Ficus carica L. | KX162940.1 |
| Fontanesia | Fontanesia phillyreoides Labill | DQ673293.1 |
| Fontanesia | Fontanesia phillyreoides Labill | FJ862058.1 |
| Fontanesia | Fontanesia phillyreoides Labill | HQ384902.1 |
| Frangla | Frangula alnus Mill. | AJ390026.1 |
| Frangla | Frangula alnus Mill. | JN891042.1 |
| Frangla | Frangula alnus Mill. | JN891414.1 |
| Frangla | Frangula alnus Mill. | JN892060.1 |
| Frangla | Frangula alnus Mill. | KM360790.1 |
| Frangla | Frangula alnus Mill. | EU676981.1 |
| Frangla | Frangula alnus Mill. | EU676982.1 |
| Frangla | Frangula alnus Mill. | KJ593416.1 |
| Frangla | Frangula alnus Mill. | KJ593417.1 |
| Frangla | Frangula alnus Mill. | KJ593418.1 |
| Frangla | Frangula alnus Mill. | KJ593419.1 |
| Fraxinus | Fraxinus angustifolia Vahl | FJ862055.1 |
| Fraxinus | Fraxinus angustifolia Vahl | HE963490.1 |
| Fraxinus | Fraxinus angustifolia Vahl | HG765055.1 |
| Fraxinus | Fraxinus angustifolia Vahl | HG765056.1 |
| Fraxinus | Fraxinus angustifolia Vahl | HG765057.1 |
| Fraxinus | Fraxinus angustifolia Vahl | Fra-ang_C06_BDV00318_run3_Rbcl_F |
| Fraxinus | Fraxinus angustifolia Vahl | Fra-ang_C06_BDV01578_run3_Rbcl_F |
| Fraxinus | Fraxinus angustifolia Vahl | Fra-ang_C06_BDV01578_run3_Rbcl_R |
| Fraxinus | Fraxinus excelsior L. | HG765063.1 |
| Fraxinus | Fraxinus excelsior L. | HG765064.1 |
| Fraxinus | Fraxinus excelsior L. | FJ862056.1 |
| Fraxinus | Fraxinus excelsior L. | FJ395592.1 |
| Fraxinus | Fraxinus excelsior L. | KJ204344.1 |
| Fraxinus | Fraxinus excelsior L. | KP088611.1 |
| Fraxinus | Fraxinus excelsior L. | Fra-exc_F08_BDV01578_run3_Rbcl_F |
| Fraxinus | Fraxinus excelsior L. | Fra-exc_F08_BDV01578_run3_Rbcl_R |
| Fraxinus | Fraxinus excelsior L. | Fra-exc_H09_BDV01578_run3_Rbcl_F |
| Fraxinus | Fraxinus excelsior L. | Fra-exc_H09_BDV01578_run3_Rbcl_R |
| Fraxinus | Fraxinus ornus L. | HG765058.1 |
| Fraxinus | Fraxinus ornus L. | HG765059.1 |
| Fraxinus | Fraxinus ornus L. | HG765060.1 |
| Fraxinus | Fraxinus ornus L. | HG765061.1 |
| Fraxinus | Fraxinus ornus L. | HG765062.1 |
| Fraxinus | Fraxinus ornus L. | FJ862057.1 |
| Fraxinus | Fraxinus ornus L. | HE963491.1 |
| Fraxinus | Fraxinus ornus L. | Fra-orn_C11_BDV00318_run3_Rbcl_F |
| Fraxinus | Fraxinus ornus L. | Fra-orn_C11_BDV01578_run3_Rbcl_F |
| Fraxinus | Fraxinus ornus L. | Fra-orn_C11_BDV01578_run3_Rbcl_R |
| Fraxinus | Fraxinus ornus L. | Fra-orn_D07_BDV00322_run4_Rbcl_F |
| Fraxinus | Fraxinus ornus L. | Fra-orn_D07_BDV01579_run4_Rbcl_F |
| Fraxinus | Fraxinus ornus L. | Fra-orn_D07_BDV01579_run4_Rbcl_R |
| Genista | Genista aetnensis (Biv.) DC. | Z70093.1 |
| Ilex | Ilex aquifolium L. | X69741.1 |
| Ilex | Ilex aquifolium L. | AF471596.1 |
| Ilex | Ilex aquifolium L. | HG765065.1 |
| Ilex | Ilex aquifolium L. | HG765066.1 |
| Ilex | Ilex aquifolium L. | HG765067.1 |
| Ilex | Ilex aquifolium L. | HG765068.1 |
| Ilex | Ilex aquifolium L. | JN893708.1 |
| Ilex | Ilex aquifolium L. | HE963516.1 |
| Ilex | Ilex aquifolium L. | KM360831.1 |
| Ilex | Ilex aquifolium L. | FJ394589.1 |
| Ilex | Ilex aquifolium L. | FJ395601.1 |
| Ilex | Ilex aquifolium L. | Ile-aqu_C01_BDV00322_run4_Rbcl_F |
| Ilex | Ilex aquifolium L. | Ile-aqu_C01_BDV01579_run4_Rbcl_R |
| Juglans | Juglans regia L. | NC_028617.1 |
| Juglans | Juglans regia L. | HE963521.1 |
| Juglans | Juglans regia L. | KF418920.1 |
| Juglans | Juglans regia L. | GQ436392.1 |
| Juglans | Juglans regia L. | KP088636.1 |
| Juglans | Juglans regia L. | KT870116.1 |
| Juglans | Juglans regia L. | Jug-reg_H02_BDV00322_run4_Rbcl_F |
| Juniperus | Juniperus communis L. | FR831943.1 |
| Juniperus | Juniperus communis L. | FR865157.1 |
| Juniperus | Juniperus communis L. | EU677072.1 |
| Juniperus | Juniperus communis L. | EU677073.1 |
| Juniperus | Juniperus communis L. | EU677074.1 |
| Juniperus | Juniperus communis L. | EU677075.1 |
| Juniperus | Juniperus communis L. | JF942144.1 |
| Juniperus | Juniperus communis L. | JF942145.1 |
| Juniperus | Juniperus communis L. | JQ512554.1 |
| Juniperus | Juniperus communis L. | JQ512555.1 |
| Juniperus | Juniperus communis L. | Jun-com_A11_BDV00318_run3_Rbcl_F |
| Juniperus | Juniperus communis L. | Jun-com_A11_BDV01578_run3_Rbcl_F |
| Juniperus | Juniperus communis L. | Jun-com_C06_SI00685_run2_Rbcl_F |
| Juniperus | Juniperus communis L. | Jun-com_C06_SI00685_run2_Rbcl_R |
| Juniperus | Juniperus communis L. | Jun-com_D02_SI00685_run2_Rbcl_F |
| Juniperus | Juniperus communis L. | Jun-com_D02_SI00685_run2_Rbcl_R |
| Juniperus | Juniperus drupacea Labill. | AY380893.1 |
| Juniperus | Juniperus drupacea Labill. | HM024301.1 |
| Juniperus | Juniperus drupacea Labill. | Jun-dru_H03_BDV00322_run4_Rbcl_F |
| Juniperus | Juniperus drupacea Labill. | Jun-dru_H03_BDV01579_run4_Rbcl_F |
| Juniperus | Juniperus drupacea Labill. | Jun-dru_H03_BDV01579_run4_Rbcl_R |
| Juniperus | Juniperus excelsa M. Bieb. | HM024303.1 |
| Juniperus | Juniperus macrocarpa Sm. | FR831949.1 |
| Juniperus | Juniperus oxycedrus L. | FR831950.1 |
| Juniperus | Juniperus oxycedrus L. | HM024319.1 |
| Juniperus | Juniperus oxycedrus L. | Jun-oxy_A04_BDV01579_run4_Rbcl_F |
| Juniperus | Juniperus oxycedrus L. | Jun-oxy_A04_BDV01579_run4_Rbcl_R |
| Juniperus | Juniperus oxycedrus L. | Jun-oxy_A06_BDV00318_run3_Rbcl_F |
| Juniperus | Juniperus oxycedrus L. | Jun-oxy_A06_BDV01578_run3_Rbcl_F |
| Juniperus | Juniperus oxycedrus L. | Jun-oxy_A06_BDV01578_run3_Rbcl_R |
| Juniperus | Juniperus oxycedrus L. | Jun-oxy_B04_BDV01579_run4_Rbcl_F |
| Juniperus | Juniperus oxycedrus L. | Jun-oxy_B04_BDV01579_run4_Rbcl_R |
| Juniperus | Juniperus oxycedrus L. | Jun-oxy_C03_SI00685_run2_Rbcl_F |
| Juniperus | Juniperus oxycedrus L. | Jun-oxy_C03_SI00685_run2_Rbcl_R |
| Juniperus | Juniperus phoenicea L. | FN689373.1 |
| Juniperus | Juniperus phoenicea L. | FR831946.1 |
| Juniperus | Juniperus phoenicea L. | FR831947.1 |
| Juniperus | Juniperus phoenicea L. | FR831948.1 |
| Juniperus | Juniperus phoenicea L. | HM024320.1 |
| Juniperus | Juniperus phoenicea L. | Jun-pho_G02_SI00685_run2_Rbcl_F |
| Juniperus | Juniperus phoenicea L. | Jun-pho_G02_SI00685_run2_Rbcl_R |
| Juniperus | Juniperus thurifera L. | HM024341.1 |
| Laurus | Laurus nobilis L. | HQ619756.1 |
| Laurus | Laurus nobilis L. | HE963536.1 |
| Laurus | Laurus nobilis L. | AF193970.1 |
| Laurus | Laurus nobilis L. | AF197593.1 |
| Laurus | Laurus nobilis L. | AY337731.1 |
| Laurus | Laurus nobilis L. | HM850111.1 |
| Laurus | Laurus nobilis L. | KM360844.1 |
| Laurus | Laurus nobilis L. | HM019469.1 |
| Laurus | Laurus nobilis L. | HM019470.1 |
| Laurus | Laurus nobilis L. | JX571859.1 |
| Laurus | Laurus nobilis L. | KP088651.1 |
| Liquidambar | Liquidambar orientalis Miller | DQ352383.1 |
| Lonicera | **Lonicera maackii (Rupr.) Heder.** | NC_039636.1 |
| Malus | Malus sylvestris Mill. | JN890877.1 |
| Malus | Malus sylvestris Mill. | JN890885.1 |
| Malus | Malus sylvestris Mill. | JN893192.1 |
| Malus | Malus sylvestris Mill. | JQ391194.1 |
| Malus | Malus sylvestris Mill. | JQ391358.1 |
| Myrica | Myrica faya Aiton | KJ595714.1 |
| Myrica | Myrica faya Aiton | KJ595715.1 |
| Myrica | Myrica faya Aiton | KJ595716.1 |
| Myrica | Myrica faya Aiton | AJ626761.1 |
| Myrica | Myrica faya Aiton | HM850183.1 |
| Myrtus | Myrtus communis L. | HF585092.1 |
| Myrtus | Myrtus communis L. | HF585093.1 |
| Myrtus | Myrtus communis L. | AF294254.2 |
| Myrtus | Myrtus communis L. | HM850194.1 |
| Myrtus | Myrtus communis L. | HE963567.1 |
| Myrtus | Myrtus communis L. | Myr-com_H06_BDV00322_run4_Rbcl_F |
| Myrtus | Myrtus communis L. | Myr-com_H06_BDV01579_run4_Rbcl_R |
| Nerium | Nerium oleander L. | HQ619727.1 |
| Nerium | Nerium oleander L. | NC_025656.1 |
| Nerium | Nerium oleander L. | EU916729.1 |
| Nerium | Nerium oleander L. | HM850198.1 |
| Nerium | Nerium oleander L. | GQ997679.1 |
| Nerium | Nerium oleander L. | JN114825.1 |
| Nerium | Nerium oleander L. | JQ412398.1 |
| Nerium | Nerium oleander L. | KJ953907.1 |
| Nerium | Nerium oleander L. | KP088700.1 |
| Nerium | Nerium oleander L. | Ner-ole_E07_BDV00318_run3_Rbcl_F |
| Nerium | Nerium oleander L. | Ner-ole_E07_BDV01578_run3_Rbcl_F |
| Nerium | Nerium oleander L. | Ner-ole_E07_BDV01578_run3_Rbcl_R |
| Olea | Olea europaea L. | AJ001766.1 |
| Olea | Olea europaea L. | HQ619760.1 |
| Olea | Olea europaea L. | KT865609.1 |
| Olea | Olea europaea L. | KT865611.1 |
| Olea | Olea europaea L. | KT865612.1 |
| Olea | Olea europaea L. | KT865613.1 |
| Olea | Olea europaea L. | KT865614.1 |
| Olea | Olea europaea L. | NC_013707.2 |
| Olea | Olea europaea L. | HE963570.1 |
| Olea | Olea europaea L. | DQ673304.1 |
| Olea | Olea europaea L. | JX572799.1 |
| Olea | Olea europaea L. | Ole-eur_A09_BDV01578_run3_Rbcl_F |
| Olea | Olea europaea L. | Ole-eur_A09_BDV01578_run3_Rbcl_R |
| Olea | Olea europaea L. | Ole-eur_B10_BDV00318_run3_Rbcl_F |
| Olea | Olea europaea L. | Ole-eur_B10_BDV01578_run3_Rbcl_F |
| Olea | Olea europaea L. | Ole-eur_B10_BDV01578_run3_Rbcl_R |
| Ostrya | Ostrya carpinifolia Scop. | HE963575.1 |
| Ostrya | Ostrya carpinifolia Scop. | KM360909.1 |
| Phillyrea | Phillyrea angustifolia L. | DQ673312.1 |
| Phillyrea | Phillyrea angustifolia L. | FJ862062.1 |
| Phillyrea | Phillyrea angustifolia L. | HE963588.1 |
| Phillyrea | Phillyrea angustifolia L. | Phy-ang_B04_BDV00318_run3_Rbcl_F |
| Phillyrea | Phillyrea angustifolia L. | Phy-ang_B04_BDV01578_run3_Rbcl_F |
| Phillyrea | Phillyrea angustifolia L. | Phy-ang_B04_BDV01578_run3_Rbcl_R |
| Phillyrea | Phillyrea angustifolia L. | Phy-med_A03_BDV00318_run3_Rbcl_F |
| Phillyrea | Phillyrea angustifolia L. | Phy-med_A03_BDV01578_run3_Rbcl_F |
| Phillyrea | Phillyrea angustifolia L. | Phy-med_A03_BDV01578_run3_Rbcl_R |
| Phillyrea | Phillyrea latifolia L. | FJ862063.1 |
| Phoenix | **Phoenix dactylifera** | MF176947.1 |
| Phoenix | **Phoenix dactylifera** | GU811709.2 |
| Phoenix | **Phoenix dactylifera** | FJ212316.3 |
| Phoenix | **Phoenix dactylifera** | MG946856.1 |
| Phoenix | **Phoenix dactylifera L.** | MF197494.1 |
| Phoenix | Phoenix theophrasti Greuter | MF197495.1 |
| Pinus | Pinus brutia Ten. | FR831903.1 |
| Pinus | Pinus brutia Ten. | KP089942.1 |
| Pinus | Pinus brutia Ten. | Pin-bru_A11_SI00193_run1_Rbcl_F |
| Pinus | Pinus brutia Ten. | Pin-bru_A11_SI00193_run1_Rbcl_R |
| Pinus | Pinus brutia Ten. | Pin-bru_B10_SI00193_run1_Rbcl_F |
| Pinus | Pinus brutia Ten. | Pin-bru_B10_SI00193_run1_Rbcl_R |
| Pinus | Pinus brutia Ten. | Pin-bru_C10_SI00193_run1_Rbcl_F |
| Pinus | Pinus brutia Ten. | Pin-bru_D07_SI00685_run2_Rbcl_F |
| Pinus | Pinus brutia Ten. | Pin-bru_D07_SI00685_run2_Rbcl_R |
| Pinus | Pinus brutia Ten. | Pin-bru_D11_SI00685_run2_Rbcl_F |
| Pinus | Pinus halepensis Miller | FN689375.1 |
| Pinus | Pinus halepensis Miller | FR831904.1 |
| Pinus | Pinus halepensis Miller | FR831905.1 |
| Pinus | Pinus halepensis Miller | FR831906.1 |
| Pinus | Pinus halepensis Miller | FR831907.1 |
| Pinus | Pinus halepensis Miller | AJ271897.1_ |
| Pinus | Pinus halepensis Miller | Pin-hal_A11_SI00685_run2_Rbcl_F |
| Pinus | Pinus halepensis Miller | Pin-hal_A11_SI00685_run2_Rbcl_R |
| Pinus | Pinus halepensis Miller | Pin-hal_B09_SI00193_run1_Rbcl_F |
| Pinus | Pinus halepensis Miller | Pin-hal_B09_SI00193_run1_Rbcl_R |
| Pinus | Pinus halepensis Miller | Pin-hal_B11_SI00685_run2_Rbcl_R |
| Pinus | Pinus halepensis Miller | Pin-hal_C09_SI00193_run1_Rbcl_F |
| Pinus | Pinus halepensis Miller | Pin-hal_C09_SI00193_run1_Rbcl_R |
| Pinus | Pinus halepensis Miller | Pin-hal_D09_SI00193_run1_Rbcl_R |
| Pinus | Pinus halepensis Miller | Pin-hal_D10_SI00193_run1_Rbcl_F |
| Pinus | Pinus halepensis Miller | Pin-hal_D10_SI00193_run1_Rbcl_R |
| Pinus | Pinus halepensis Miller | Pin-hal_D11_BDV00322_run4_Rbcl_F |
| Pinus | Pinus halepensis Miller | Pin-hal_E05_BDV00318_run3_Rbcl_F |
| Pinus | Pinus halepensis Miller | Pin-hal_E10_SI00193_run1_Rbcl_F |
| Pinus | Pinus halepensis Miller | Pin-hal_E10_SI00193_run1_Rbcl_R |
| Pinus | Pinus halepensis Miller | Pin-hal_E11_BDV00322_run4_Rbcl_F |
| Pinus | Pinus halepensis Miller | Pin-hal_F10_SI00193_run1_Rbcl_F |
| Pinus | Pinus halepensis Miller | Pin-hal_F10_SI00193_run1_Rbcl_R |
| Pinus | Pinus halepensis Miller | Pin-hal_G10_SI00193_run1_Rbcl_F |
| Pinus | Pinus halepensis Miller | Pin-hal_G10_SI00193_run1_Rbcl_R |
| Pinus | Pinus heldreichii Christ | DQ353730.1 |
| Pinus | Pinus heldreichii Christ | FR831914.1 |
| Pinus | Pinus heldreichii Christ | Pin-hel_A06_SI00193_run1_Rbcl_F |
| Pinus | Pinus heldreichii Christ | Pin-hel_A06_SI00193_run1_Rbcl_R |
| Pinus | Pinus heldreichii Christ | Pin-hel_B06_SI00193_run1_Rbcl_F |
| Pinus | Pinus heldreichii Christ | Pin-hel_B06_SI00193_run1_Rbcl_R |
| Pinus | Pinus heldreichii Christ | Pin-leu_A08_SI00685_run2_Rbcl_F |
| Pinus | Pinus heldreichii Christ | Pin-leu_A08_SI00685_run2_Rbcl_R |
| Pinus | Pinus heldreichii Christ | Pin-leu_B08_SI00685_run2_Rbcl_F |
| Pinus | Pinus heldreichii Christ | Pin-leu_B08_SI00685_run2_Rbcl_R |
| Pinus | Pinus heldreichii Christ | Pin-leu_G07_SI00685_run2_Rbcl_F |
| Pinus | Pinus heldreichii Christ | Pin-leu_G07_SI00685_run2_Rbcl_R |
| Pinus | Pinus heldreichii Christ | Pin-leu_H07_SI00685_run2_Rbcl_F |
| Pinus | Pinus heldreichii Christ | Pin-leu_H07_SI00685_run2_Rbcl_R |
| Pinus | Pinus mugo Turra | AB063372.1 |
| Pinus | Pinus mugo Turra | FR831919.1 |
| Pinus | Pinus mugo Turra | FR831920.1 |
| Pinus | Pinus mugo Turra | FR831921.1 |
| Pinus | Pinus mugo Turra | FR831922.1 |
| Pinus | Pinus mugo Turra | FR831923.1 |
| Pinus | Pinus mugo Turra | EU269032.1 |
| Pinus | Pinus nigra J.F. Arnold | FN689380.1 |
| Pinus | Pinus nigra J.F. Arnold | HQ619766.1 |
| Pinus | Pinus nigra J.F. Arnold | JQ512593.1 |
| Pinus | Pinus nigra J.F. Arnold | DQ353733.1 |
| Pinus | Pinus nigra J.F. Arnold | FR831924.1 |
| Pinus | Pinus nigra J.F. Arnold | FR831925.1 |
| Pinus | Pinus nigra J.F. Arnold | KP088735.1 |
| Pinus | Pinus nigra J.F. Arnold | Pin-nig_A04_SI00193_run1_Rbcl_F |
| Pinus | Pinus nigra J.F. Arnold | Pin-nig_A04_SI00193_run1_Rbcl_R |
| Pinus | Pinus nigra J.F. Arnold | Pin-nig_B04_SI00193_run1_Rbcl_F |
| Pinus | Pinus nigra J.F. Arnold | Pin-nig_B04_SI00193_run1_Rbcl_R |
| Pinus | Pinus nigra J.F. Arnold | Pin-nig_B05_SI00193_run1_Rbcl_F |
| Pinus | Pinus nigra J.F. Arnold | Pin-nig_B05_SI00193_run1_Rbcl_R |
| Pinus | Pinus nigra J.F. Arnold | Pin-nig_C02_SI00193_run1_Rbcl_F |
| Pinus | Pinus nigra J.F. Arnold | Pin-nig_C02_SI00193_run1_Rbcl_R |
| Pinus | Pinus nigra J.F. Arnold | Pin-nig_C04_SI00193_run1_Rbcl_F |
| Pinus | Pinus nigra J.F. Arnold | Pin-nig_C04_SI00193_run1_Rbcl_R |
| Pinus | Pinus nigra J.F. Arnold | Pin-nig_C05_SI00193_run1_Rbcl_F |
| Pinus | Pinus nigra J.F. Arnold | Pin-nig_C05_SI00193_run1_Rbcl_R |
| Pinus | Pinus nigra J.F. Arnold | Pin-nig_D04_SI00193_run1_Rbcl_F |
| Pinus | Pinus nigra J.F. Arnold | Pin-nig_D04_SI00193_run1_Rbcl_R |
| Pinus | Pinus nigra J.F. Arnold | Pin-nig_E04_SI00193_run1_Rbcl_F |
| Pinus | Pinus nigra J.F. Arnold | Pin-nig_E04_SI00193_run1_Rbcl_R |
| Pinus | Pinus nigra J.F. Arnold | Pin-nig_F04_SI00193_run1_Rbcl_F |
| Pinus | Pinus nigra J.F. Arnold | Pin-nig_F04_SI00193_run1_Rbcl_R |
| Pinus | Pinus nigra J.F. Arnold | Pin-nig_F11_BDV00322_run4_Rbcl_F |
| Pinus | Pinus nigra J.F. Arnold | Pin-nig_F12_SI00193_run1_Rbcl_F |
| Pinus | Pinus nigra J.F. Arnold | Pin-nig_F12_SI00193_run1_Rbcl_R |
| Pinus | Pinus nigra J.F. Arnold | Pin-nig_G04_SI00193_run1_Rbcl_F |
| Pinus | Pinus nigra J.F. Arnold | Pin-nig_G11_BDV00322_run4_Rbcl_F |
| Pinus | Pinus nigra J.F. Arnold | Pin-nig_G12_SI00193_run1_Rbcl_F |
| Pinus | Pinus nigra J.F. Arnold | Pin-nig_G12_SI00193_run1_Rbcl_R |
| Pinus | Pinus nigra J.F. Arnold | Pin-nig_H03_SI00193_run1_Rbcl_F |
| Pinus | Pinus nigra J.F. Arnold | Pin-nig_H03_SI00193_run1_Rbcl_R |
| Pinus | Pinus nigra J.F. Arnold | Pin-nig_H12_BDV00322_run4_Rbcl_F |
| Pinus | Pinus nigra J.F. Arnold | Pin-nig_H12_SI00193_run1_Rbcl_F |
| Pinus | Pinus nigra J.F. Arnold | Pin-nig_H12_SI00193_run1_Rbcl_R |
| Pinus | Pinus nigra J.F. Arnold | Pin-nig_H12_SI00685_run2_Rbcl_F |
| Pinus | Pinus nigra J.F. Arnold | Pin-nig_H12_SI00685_run2_Rbcl_R |
| Pinus | Pinus pinaster Aiton | FR831912.1 |
| Pinus | Pinus pinaster Aiton | FR831913.1 |
| Pinus | Pinus pinaster Aiton | FR831911.1 |
| Pinus | Pinus pinaster Aiton | Pin-ptr_B11_SI00193_run1_Rbcl_F |
| Pinus | Pinus pinaster Aiton | Pin-ptr_B11_SI00193_run1_Rbcl_R |
| Pinus | Pinus pinaster Aiton | Pin-ptr_C08_SI00685_run2_Rbcl_F |
| Pinus | Pinus pinaster Aiton | Pin-ptr_C08_SI00685_run2_Rbcl_R |
| Pinus | Pinus pinaster Aiton | Pin-ptr_C11_BDV00322_run4_Rbcl_F |
| Pinus | Pinus pinaster Aiton | Pin-ptr_C11_SI00193_run1_Rbcl_F |
| Pinus | Pinus pinaster Aiton | Pin-ptr_C11_SI00193_run1_Rbcl_R |
| Pinus | Pinus pinaster Aiton | Pin-ptr_D08_SI00685_run2_Rbcl_F |
| Pinus | Pinus pinaster Aiton | Pin-ptr_D08_SI00685_run2_Rbcl_R |
| Pinus | Pinus pinaster Aiton | Pin-ptr_E08_SI00685_run2_Rbcl_F |
| Pinus | Pinus pinaster Aiton | Pin-ptr_E08_SI00685_run2_Rbcl_R |
| Pinus | Pinus pinaster Aiton | Pin-ptr_F09_SI00193_run1_Rbcl_F |
| Pinus | Pinus pinaster Aiton | Pin-ptr_F09_SI00193_run1_Rbcl_R |
| Pinus | Pinus pinaster Aiton | Pin-ptr_G09_SI00193_run1_Rbcl_F |
| Pinus | Pinus pinaster Aiton | Pin-ptr_G09_SI00193_run1_Rbcl_R |
| Pinus | Pinus pinea L. | FN689374.1 |
| Pinus | Pinus pinea L. | FR831908.1 |
| Pinus | Pinus pinea L. | FR831909.1 |
| Pinus | Pinus pinea L. | FR831910.1 |
| Pinus | Pinus pinea L. | X58133.1 |
| Pinus | Pinus pinea L. | DQ353729.1 |
| Pinus | Pinus pinea L. | Pin-pin_A06_SI00685_run2_Rbcl_F |
| Pinus | Pinus pinea L. | Pin-pin_C11_SI00685_run2_Rbcl_F |
| Pinus | Pinus pinea L. | Pin-pin_C11_SI00685_run2_Rbcl_R |
| Pinus | Pinus pinea L. | Pin-pin_D12_SI00193_run1_Rbcl_F |
| Pinus | Pinus pinea L. | Pin-pin_D12_SI00193_run1_Rbcl_R |
| Pinus | Pinus pinea L. | Pin-pin_E07_SI00685_run2_Rbcl_F |
| Pinus | Pinus pinea L. | Pin-pin_E07_SI00685_run2_Rbcl_R |
| Pinus | Pinus pinea L. | Pin-pin_E12_SI00193_run1_Rbcl_F |
| Pinus | Pinus pinea L. | Pin-pin_E12_SI00193_run1_Rbcl_R |
| Pinus | Pinus sylvestris L. | AB097775.1 |
| Pinus | Pinus sylvestris L. | HQ619767.1 |
| Pinus | Pinus sylvestris L. | KP089947.1 |
| Pinus | Pinus sylvestris L. | EU677091.1 |
| Pinus | Pinus sylvestris L. | EU677092.1 |
| Pinus | Pinus sylvestris L. | EU677093.1 |
| Pinus | Pinus sylvestris L. | KP088742.1 |
| Pinus | Pinus sylvestris L. | Pin-syl_B07_SI00193_run1_Rbcl_F |
| Pinus | Pinus sylvestris L. | Pin-syl_B07_SI00193_run1_Rbcl_R |
| Pinus | Pinus sylvestris L. | Pin-syl_C06_SI00193_run1_Rbcl_F |
| Pinus | Pinus sylvestris L. | Pin-syl_C06_SI00193_run1_Rbcl_R |
| Pinus | Pinus sylvestris L. | Pin-syl_H04_SI00193_run1_Rbcl_F |
| Pinus | Pinus sylvestris L. | Pin-syl_H04_SI00193_run1_Rbcl_R |
| Pinus | Pinus uncinata Ramond ex DC. | AB097774.1 |
| Pinus | Pinus uncinata Ramond ex DC. | Pin-unc_A05_SI00193_run1_Rbcl_F |
| Pinus | Pinus uncinata Ramond ex DC. | Pin-unc_A05_SI00193_run1_Rbcl_R |
| Pinus | Pinus uncinata Ramond ex DC. | Pin-unc_D06_SI00193_run1_Rbcl_F |
| Pinus | Pinus uncinata Ramond ex DC. | Pin-unc_D06_SI00193_run1_Rbcl_R |
| Pistacia | Pistacia lentiscus L | KM527352.1 |
| Platanus | Platanus orientalis L. | AY858644.1 |
| Platanus | Platanus orientalis L. | JN114832.1 |
| Platanus | Platanus orientalis L. | KJ732974.1 |
| Platanus | Platanus orientalis L. | KP088748.1 |
| Populus | Populus alba L. | AP008956.1 |
| Populus | Populus alba L. | NC_008235.1 |
| Populus | Populus alba L. | HM850277.1 |
| Populus | Populus alba L. | JF429909.2 |
| Populus | Populus alba L. | GQ248680.1 |
| Populus | Populus alba L. | KP088752.1 |
| Populus | Populus nigra L. | KT626975.1 |
| Populus | Populus nigra L. | KT626976.1 |
| Populus | Populus nigra L. | KT626977.1 |
| Populus | Populus nigra L. | KT626978.1 |
| Populus | Populus nigra L. | KT626979.1 |
| Populus | Populus nigra L. | KT627002.1 |
| Populus | Populus nigra L. | KM360940.1 |
| Populus | Populus nigra L. | KC485213.1 |
| Populus | Populus nigra L. | KF940815.1 |
| Populus | Populus nigra L. | pop-nig_E10_BDV00318_run3_Rbcl_F |
| Populus | Populus tremula L. | KP861984.1 |
| Populus | Populus tremula L. | JN892183.1 |
| Populus | Populus tremula L. | JN893688.1 |
| Populus | Populus tremula L. | HE963609.1 |
| Populus | Populus tremula L. | HE574617.1 |
| Populus | Populus tremula L. | AJ418827.1 |
| Populus | Populus tremula L. | JF429908.2 |
| Populus | Populus tremula L. | GQ248681.1 |
| Populus | Populus tremula L. | KC485222.1 |
| Populus | Populus tremula L. | JX572872.1 |
| Populus | Populus tremula L. | KC485206.1 |
| Prunus | Prunus avium L | HQ235393.1 |
| Prunus | Prunus avium L | HQ235394.1 |
| Prunus | Prunus avium L | JN891862.1 |
| Prunus | Prunus avium L | JN892271.1 |
| Prunus | Prunus avium L | JN892272.1 |
| Prunus | Prunus avium L | KP769015.1 |
| Prunus | Prunus avium L | KP769034.1 |
| Prunus | Prunus avium L | KP402609.1 |
| Prunus | Prunus avium L | KP402674.1 |
| Prunus | Prunus avium L | Pru-avi_G10_BDV01578_run3_Rbcl_F |
| Prunus | Prunus brigantina Vill. | HQ235397.1 |
| Prunus | Prunus cerasifera Ehrh. | HQ235406.1 |
| Prunus | Prunus cerasifera Ehrh. | HQ235407.1 |
| Prunus | Prunus cerasifera Ehrh. | HQ235408.1 |
| Prunus | Prunus cerasifera Ehrh. | HQ235409.1 |
| Prunus | Prunus cerasifera Ehrh. | HQ619778.1 |
| Prunus | Prunus cerasifera Ehrh. | HE963616.1 |
| Prunus | Prunus cerasifera Ehrh. | AF227900.1 |
| Prunus | Prunus cocomilia Ten. | AF227902.1 |
| Prunus | Prunus laurocerasus L | HE963618.1 |
| Prunus | Prunus laurocerasus L | HQ235465.1 |
| Prunus | Prunus laurocerasus L | HQ619779.1 |
| Prunus | Prunus laurocerasus L | U06809.1 |
| Prunus | Prunus lusitanica L. | HQ235466.1 |
| Prunus | Prunus mahaleb L. | HQ235468.1 |
| Prunus | Prunus mahaleb L. | HQ235469.1 |
| Prunus | Prunus mahaleb L. | KP769080.1 |
| Prunus | Prunus mahaleb L. | KP769081.1 |
| Prunus | Prunus mahaleb L. | KP769082.1 |
| Prunus | Prunus mahaleb L. | KP769083.1 |
| Prunus | Prunus mahaleb L. | KP769084.1 |
| Prunus | Prunus mahaleb L. | KP769085.1 |
| Prunus | Prunus mahaleb L. | KP769086.1 |
| Prunus | Prunus mahaleb L. | HE963619.1 |
| Prunus | Prunus mahaleb L. | Pru-mah_A01_BDV00322_run4_Rbcl_F |
| Prunus | Prunus padus L. | HQ235499.1 |
| Prunus | Prunus padus L. | HQ235500.1 |
| Prunus | Prunus padus L. | JN891864.1 |
| Prunus | Prunus padus L. | JN892373.1 |
| Prunus | Prunus padus L. | JN893268.1 |
| Prunus | Prunus padus L. | JN893269.1 |
| Prunus | Prunus padus L. | KP760072.1 |
| Prunus | Prunus padus L. | KP769111.1 |
| Prunus | Prunus padus L. | NC_026982.1 |
| Prunus | Prunus padus L. | KP088764.1 |
| Prunus | Prunus webbii (Spach) Vierh. | HQ235594.1 |
| Pyrus | Pyrus cordata Desv. | KF997329.1 |
| Pyrus | Pyrus pyraster (L.) Burgsd. | KM360951.1 |
| Pyrus | Pyrus spinosa Forssk. | HG737342.1 |
| Pyrus | Pyrus spinosa Forssk. | NC_023130.1 |
| Pyrus | Pyrus spinosa Forssk. | JQ391217.1 |
| Pyrus | Pyrus syriaca Boiss. | JQ391212.1 |
| Pyrus | Pyrus syriaca Boiss. | JQ391377.1 |
| Quercus | Quercus alnifolia Poech | LM653039.1 |
| Quercus | Quercus alnifolia Poech | LM653040.1 |
| Quercus | Quercus alnifolia Poech | LM653098.1 |
| Quercus | Quercus aucheri Jaub. & Spach | LM652975.1 |
| Quercus | Quercus aucheri Jaub. & Spach | LM652976.1 |
| Quercus | Quercus aucheri Jaub. & Spach | LM652977.1 |
| Quercus | Quercus aucheri Jaub. & Spach | LM652978.1 |
| Quercus | Quercus aucheri Jaub. & Spach | LM652979.1 |
| Quercus | Quercus canariensis Willd. | KF683140.1 |
| Quercus | Quercus cerris L. | AB125017.1 |
| Quercus | Quercus cerris L. | FN675722.1 |
| Quercus | Quercus cerris L. | FN675723.1 |
| Quercus | Quercus cerris L. | FN675724.1 |
| Quercus | Quercus coccifera L. | AB125018.1 |
| Quercus | Quercus coccifera L. | FN675713.1 |
| Quercus | Quercus coccifera L. | FN675714.1 |
| Quercus | Quercus coccifera L. | FN675715.1 |
| Quercus | Quercus coccifera L. | LM652989.1 |
| Quercus | Quercus coccifera L. | LM652990.1 |
| Quercus | Quercus coccifera L. | LM652991.1 |
| Quercus | Quercus coccifera L. | LM652992.1 |
| Quercus | Quercus coccifera L. | LM653043.1 |
| Quercus | Quercus coccifera L. | LM653044.1 |
| Quercus | Quercus coccifera L. | Que-coc_D02_BDV00318_run3_Rbcl_F |
| Quercus | Quercus crenata Lam. | FN675730.1 |
| Quercus | Quercus crenata Lam. | FN675731.1 |
| Quercus | Quercus crenata Lam. | FN675732.1 |
| Quercus | Quercus faginea Lam. | KF683147.1 |
| Quercus | Quercus frainetto Ten. | FN675721.1 |
| Quercus | Quercus frainetto Ten. | FN675741.1 |
| Quercus | Quercus frainetto Ten. | FN675742.1 |
| Quercus | Quercus ilex L. | AB125020.1 |
| Quercus | Quercus ilex L. | FN675717.1 |
| Quercus | Quercus ilex L. | FN675718.1 |
| Quercus | Quercus ilex L. | FN675719.1 |
| Quercus | Quercus ilex L. | LM653007.1 |
| Quercus | Quercus ilex L. | LM653008.1 |
| Quercus | Quercus ilex L. | LM653009.1 |
| Quercus | Quercus ilex L. | LM653010.1 |
| Quercus | Quercus ilex L. | Que-ile_G08_BDV01578_run3_Rbcl_F |
| Quercus | Quercus ilex L. | Que-ile_G08_BDV01578_run3_Rbcl_R |
| Quercus | Quercus infectoria Olivier | KF683157.1 |
| Quercus | Quercus ithaburensis Decaisne | FN675729.1 |
| Quercus | Quercus petraea (Mattusch.) Liebl | AB125024.1 |
| Quercus | Quercus petraea (Mattusch.) Liebl | FN675738.1 |
| Quercus | Quercus petraea (Mattusch.) Liebl | FN675739.1 |
| Quercus | Quercus petraea (Mattusch.) Liebl | FN675740.1 |
| Quercus | Quercus petraea (Mattusch.) Liebl | HQ619752.1 |
| Quercus | Quercus petraea (Mattusch.) Liebl | JN890839.1 |
| Quercus | Quercus petraea (Mattusch.) Liebl | JN890841.1 |
| Quercus | Quercus petraea (Mattusch.) Liebl | HE963626.1 |
| Quercus | Quercus pubescens Willd. | FN675720.1 |
| Quercus | Quercus pubescens Willd. | FN675736.1 |
| Quercus | Quercus pubescens Willd. | FN675737.1 |
| Quercus | Quercus pubescens Willd. | Que-pub_D07_BDV00318_run3_Rbcl_F |
| Quercus | Quercus pyrenaica Willd. | LM653029.1 |
| Quercus | Quercus robur L. | AB125025.1 |
| Quercus | Quercus robur L. | FN675733.1 |
| Quercus | Quercus robur L. | FN675734.1 |
| Quercus | Quercus robur L. | FN675735.1 |
| Quercus | Quercus robur L. | HQ619750.1 |
| Quercus | Quercus robur L. | JN892128.1 |
| Quercus | Quercus robur L. | JN893094.1 |
| Quercus | Quercus robur L. | KP088814.1 |
| Quercus | Quercus robur L. | KP088815.1 |
| Quercus | Quercus suber L. | AB125027.1 |
| Quercus | Quercus suber L. | FN675726.1 |
| Quercus | Quercus suber L. | FN675727.1 |
| Quercus | Quercus suber L. | FN675728.1 |
| Quercus | Quercus suber L. | LM653092.1 |
| Quercus | Quercus suber L. | Que-sub_G07_BDV00322_run4_Rbcl_F |
| Quercus | Quercus trojana Webb | FN675725.1 |
| Rhamnus | Rhamnus alaternus L. | Rha-ala_F03_BDV00318_run3_Rbcl_F |
| Rhamnus | Rhamnus alaternus L. | Rha-ala_F03_BDV01578_run3_Rbcl_R |
| Rhamnus | Rhamnus catharticus L. | KM360955.1 |
| Rhamnus | Rhamnus catharticus L. | L13189.2 |
| Rhamnus | Rhamnus catharticus L. | EU676977.1 |
| Rhamnus | Rhamnus catharticus L. | EU676978.1 |
| Rhamnus | Rhamnus catharticus L. | EU676979.1 |
| Rhamnus | Rhamnus catharticus L. | EU676980.1 |
| Rhamnus | Rhamnus catharticus L. | HQ590235.1 |
| Rhamnus | Rhamnus catharticus L. | KJ593660.1 |
| Rhamnus | Rhamnus catharticus L. | KJ593661.1 |
| Rhamnus | Rhamnus catharticus L. | KJ593662.1 |
| Rhamnus | Rhamnus catharticus L. | X69752.1 |
| Rhamnus | Rhamnus catharticus L. | Rha-cat_F01_BDV00322_run4_Rbcl_F |
| Rhamnus | Rhamnus catharticus L. | Rha-cat_F01_BDV01579_run4_Rbcl_F |
| Rhamnus | Rhamnus catharticus L. | Rha-cat_F01_BDV01579_run4_Rbcl_R |
| Rhododendron | Rhododendron ponticum L. | KM360957.1 |
| Salix | Salix alba L. | AB012780.1 |
| Salix | Salix alba L. | AJ849572.1 |
| Salix | Salix alba L. | JN890861.1 |
| Salix | Salix alba L. | HQ590254.1 |
| Salix | Salix alba L. | KC415323.1 |
| Salix | Salix alba L. | GU373324.1 |
| Salix | Salix alba L. | JN114840.1 |
| Salix | Salix alba L. | KM002826.1 |
| Salix | Salix alba L. | GU373325.1 |
| Salix | Salix caprea L. | FR694871.1 |
| Salix | Salix caprea L. | HE612047.1 |
| Salix | Salix caprea L. | JN891099.1 |
| Salix | Salix caprea L. | JN891946.1 |
| Salix | Salix caprea L. | JN892173.1 |
| Salix | Salix caprea L. | KX016368.1 |
| Salix | Salix caprea L. | KX016369.1 |
| Salix | Salix caprea L. | GU373330.1 |
| Salix | Salix caprea L. | GU373331.1 |
| Salix | Salix caprea L. | KJ204400.1 |
| Salix | Salix cinerea L. | JN891947.1 |
| Salix | Salix cinerea L. | JN891948.1 |
| Salix | Salix cinerea L. | JN892120.1 |
| Salix | Salix cinerea L. | JN893030.1 |
| Salix | Salix cinerea L. | KX016377.1 |
| Salix | Salix cinerea L. | KX016378.1 |
| Salix | Salix cinerea L. | GU373334.1 |
| Salix | Salix elaeagnos Scop. | KX016393.1 |
| Salix | Salix elaeagnos Scop. | KX016394.1 |
| Salix | Salix elaeagnos Scop. | KM002986.1 |
| Salix | Salix elaeagnos Scop. | Sal-ele_F05_BDV00318_run3_Rbcl_F |
| Salix | Salix elaeagnos Scop. | Sal-ele_F05_BDV01578_run3_Rbcl_F |
| Salix | Salix elaeagnos Scop. | Sal-ele_F05_BDV01578_run3_Rbcl_R |
| Salix | Salix fragilis L. | AJ849573.1 |
| Salix | Salix fragilis L. | JN890632.1 |
| Salix | Salix fragilis L. | JN891949.1 |
| Salix | Salix fragilis L. | JN891950.1 |
| Salix | Salix fragilis L. | GU373335.1 |
| Salix | Salix pedicellata Desf. | KM002941.1 |
| Salix | Salix pentandra L. | AJ849575.1 |
| Salix | Salix pentandra L. | JN890626.1 |
| Salix | Salix pentandra L. | JN891953.1 |
| Salix | Salix pentandra L. | JN891954.1 |
| Salix | Salix pentandra L. | KX016471.1 |
| Salix | Salix pentandra L. | KX016472.1 |
| Salix | Salix pentandra L. | GU373348.1 |
| Salix | Salix pentandra L. | KC415360.1 |
| Salix | Salix pentandra L. | KM003142.1 |
| Salix | Salix purpurea L | AJ849578.1 |
| Salix | Salix purpurea L | KP019639.1 |
| Salix | Salix purpurea L | JN890628.1 |
| Salix | Salix purpurea L | JN891725.1 |
| Salix | Salix purpurea L | JN891726.1 |
| Salix | Salix purpurea L | KX016486.1 |
| Salix | Salix purpurea L | KX016487.1 |
| Salix | Salix purpurea L | KX016488.1 |
| Salix | Salix purpurea L | NC_026722.1 |
| Salix | Salix purpurea L | GU373351.1 |
| Salix | Salix purpurea L | GU373352.1 |
| Salix | Salix purpurea L | HE610667.1 |
| Salix | Salix triandra L. | AJ849576.1 |
| Salix | Salix triandra L. | FN689365.1 |
| Salix | Salix triandra L. | JN890633.1 |
| Salix | Salix triandra L. | JN891729.1 |
| Salix | Salix triandra L. | JN891730.1 |
| Salix | Salix triandra L. | KX016523.1 |
| Salix | Salix triandra L. | HE610660.1 |
| Salix | Salix viminalis L. | AJ849577.1 |
| Salix | Salix viminalis L. | JN890634.1 |
| Salix | Salix viminalis L. | JN891727.1 |
| Salix | Salix viminalis L. | JN891728.1 |
| Salix | Salix viminalis L. | KX016532.1 |
| Salix | Salix viminalis L. | KX016533.1 |
| Salix | Salix viminalis L. | KM003341.1 |
| Salix | Salix viminalis L. | HE610665.1 |
| Salix | Salix viminalis L. | HE610666.1 |
| Sambucus | Sambucus nigra L. | HG765079.1 |
| Sambucus | Sambucus nigra L. | HG765080.1 |
| Sambucus | Sambucus nigra L. | HG765081.1 |
| Sambucus | Sambucus nigra L. | HG765082.1 |
| Sambucus | Sambucus nigra L. | HG765083.1 |
| Sambucus | Sambucus nigra L. | HE963645.1 |
| Sambucus | Sambucus nigra L. | HM850334.1 |
| Sambucus | Sambucus nigra L. | HQ644067.1 |
| Sambucus | Sambucus nigra L. | JQ412417.1 |
| Sambucus | Sambucus racemosa L. | L14066.1 |
| Sambucus | Sambucus racemosa L. | HG765084.1 |
| Sambucus | Sambucus racemosa L. | AF446928.1 |
| Sambucus | Sambucus racemosa L. | KJ593677.1 |
| Sambucus | Sambucus racemosa L. | KJ841550.1 |
| Searsia | **Rhus lucida L.** | AM234811.1 |
| Sorbus | Sorbus aria (L.) Crantz | HG765085.1 |
| Sorbus | Sorbus aria (L.) Crantz | HG765086.1 |
| Sorbus | Sorbus aria (L.) Crantz | HG765087.1 |
| Sorbus | Sorbus aria (L.) Crantz | JN891344.1 |
| Sorbus | Sorbus aria (L.) Crantz | JN891897.1 |
| Sorbus | Sorbus aria (L.) Crantz | JN892380.1 |
| Sorbus | Sorbus aria (L.) Crantz | GQ248697.1 |
| Sorbus | Sorbus aria (L.) Crantz | Sor-ari_C09_BDV01578_run3_Rbcl_F |
| Sorbus | Sorbus aria (L.) Crantz | Sor-ari_C09_BDV01578_run3_Rbcl_R |
| Sorbus | Sorbus aucuparia L. | HG765088.1 |
| Sorbus | Sorbus aucuparia L. | HG765089.1 |
| Sorbus | Sorbus aucuparia L. | JN891093.1 |
| Sorbus | Sorbus aucuparia L. | JN891345.1 |
| Sorbus | Sorbus aucuparia L. | JN893287.1 |
| Sorbus | Sorbus aucuparia L. | JN893288.1 |
| Sorbus | Sorbus aucuparia L. | JN893712.1 |
| Sorbus | Sorbus aucuparia L. | HQ590284.1 |
| Sorbus | Sorbus domestica L. | HG765090.1 |
| Sorbus | Sorbus domestica L. | HG765091.1 |
| Sorbus | Sorbus domestica L. | HG765092.1 |
| Sorbus | Sorbus domestica L. | JN890680.1 |
| Sorbus | Sorbus domestica L. | JN891096.1 |
| Sorbus | Sorbus domestica L. | JN893246.1 |
| Sorbus | Sorbus domestica L. | HE963687.1 |
| Sorbus | Sorbus domestica L. | KM360990.1 |
| Sorbus | Sorbus domestica L. | Sor-dam_D09_BDV01578_run3_Rbcl_F |
| Sorbus | Sorbus domestica L. | Sor-dam_D09_BDV01578_run3_Rbcl_R |
| Sorbus | Sorbus torminalis (L.) Crantz | HE963688.1 |
| Sorbus | Sorbus torminalis (L.) Crantz | HG765093.1 |
| Sorbus | Sorbus torminalis (L.) Crantz | HG765094.1 |
| Sorbus | Sorbus torminalis (L.) Crantz | HG765095.1 |
| Sorbus | Sorbus torminalis (L.) Crantz | JN891605.1 |
| Sorbus | Sorbus torminalis (L.) Crantz | JN892255.1 |
| Sorbus | Sorbus torminalis (L.) Crantz | JN892541.1 |
| Spartium | Spartium junceum L. | KM360993.1 |
| Staphylea | Staphylea pinnata L. | KX999440.1 |
| Styrax | Styrax officinalis L. | AF396159.1 |
| Styrax | Styrax officinalis L. | EU980810.1 |
| Tamarix | Tamarix africana Poiret | HM850389.1 |
| Tamarix | Tamarix gallica L. | KC584887.1 |
| Tamarix | Tamarix gallica L. | KM361003.1 |
| Tamarix | Tamarix parviflora DC. | AY099901.1 |
| Taxus | Taxus baccata L. | FR831952.1 |
| Taxus | Taxus baccata L. | FR831953.1 |
| Taxus | Taxus baccata L. | FR831954.1 |
| Taxus | Taxus baccata L. | HM591064.1 |
| Taxus | Taxus baccata L. | HM591065.1 |
| Taxus | Taxus baccata L. | HM591066.1 |
| Taxus | Taxus baccata L. | HM591067.1 |
| Taxus | Taxus baccata L. | HM591068.1 |
| Taxus | Taxus baccata L. | KP088875.1 |
| Taxus | Taxus baccata L. | Tax-bac_A12_SI00685_run2_Rbcl_F |
| Taxus | Taxus baccata L. | Tax-bac_A12_SI00685_run2_Rbcl_R |
| Taxus | Taxus baccata L. | Tax-bac_B12_SI00685_run2_Rbcl_F |
| Taxus | Taxus baccata L. | Tax-bac_B12_SI00685_run2_Rbcl_R |
| Taxus | Taxus baccata L. | Tax-bac_G05_SI00685_run2_Rbcl_F |
| Taxus | Taxus baccata L. | Tax-bac_G05_SI00685_run2_Rbcl_R |
| Taxus | Taxus baccata L. | Tax-bac_G11_SI00685_run2_Rbcl_F |
| Taxus | Taxus baccata L. | Tax-bac_G11_SI00685_run2_Rbcl_R |
| Tetraclinis | Tetraclinis articulata (Vahl) Masters | HM024346.1 |
| Tetraclinis | Tetraclinis articulata (Vahl) Masters | L12576.2 |
| Tilia | Tilia cordata Miller | JN890926.1 |
| Tilia | Tilia cordata Miller | JN891179.1 |
| Tilia | Tilia cordata Miller | JN893524.1 |
| Tilia | Tilia cordata Miller | HE963708.1 |
| Tilia | Tilia cordata Miller | KP088884.1 |
| Tilia | Tilia cordata Miller | KP088885.1 |
| Tilia | Tilia platyphyllos Scop. | JN890677.1 |
| Tilia | Tilia platyphyllos Scop. | JN891176.1 |
| Tilia | Tilia platyphyllos Scop. | JN891178.1 |
| Tilia | Tilia platyphyllos Scop. | KP088888.1 |
| Tilia | Tilia platyphyllos Scop. | KP088889.1 |
| Ulmus | Ulmus glabra Hudson | Ulm-gla_E05_BDV00322_run4_Rbcl_F |
| Ulmus | Ulmus laevis Pallas | HE963716.1 |
| Ulmus | Ulmus laevis Pallas | HE574623.1 |
| Ulmus | Ulmus laevis Pallas | KC539702.1 |
| Ulmus | Ulmus laevis Pallas | KP088895.1 |
| Ulmus | Ulmus minor Mill. | JN893158.1 |
| Ulmus | Ulmus minor Mill. | JN893364.1 |
| Ulmus | Ulmus minor Mill. | KJ204421.1 |
| Ulmus | Ulmus minor Mill. | Ulm-min_A05_BDV00322_run4_Rbcl_F |
| Ulmus | Ulmus minor Mill. | Ulm-min_A05_BDV01579_run4_Rbcl_F |
| Ulmus | Ulmus minor Mill. | Ulm-min_A05_BDV01579_run4_Rbcl_R |
| Ulmus | Ulmus minor Mill. | Ulm-min_C04_BDV00322_run4_Rbcl_F |
| Ulmus | Ulmus minor Mill. | Ulm-min_C04_BDV01579_run4_Rbcl_F |
| Ulmus | Ulmus minor Mill. | Ulm-min_C04_BDV01579_run4_Rbcl_R |
| Ulmus | Ulmus minor Mill. | Ulm-min_D04_BDV00322_run4_Rbcl_F |
| Ulmus | Ulmus minor Mill. | Ulm-min_F05_BDV00322_run4_Rbcl_F |
| Ulmus | Ulmus minor Mill. | Ulm-min_F05_BDV01579_run4_Rbcl_F |
| Ulmus | Ulmus minor Mill. | Ulm-min_F05_BDV01579_run4_Rbcl_R |
| Ulmus | Ulmus minor Mill. | Ulm-min_G04_BDV00318_run3_Rbcl_F |
| Ulmus | Ulmus procera Salisb. | JN891060.1 |
| Ulmus | Ulmus procera Salisb. | JN891078.1 |
| Ulmus | Ulmus procera Salisb. | JN893145.1 |
| Ulmus | Ulmus procera Salisb. | JN893362.1 |
| Ulmus | Ulmus procera Salisb. | JN893365.1 |
| Ulmus | Ulmus procera Salisb. | Ulm-pro_D06_BDV00322_run4_Rbcl_F |
| Ulmus | Ulmus procera Salisb. | Ulm-pro_D06_BDV01579_run4_Rbcl_F |
| Ulmus | Ulmus procera Salisb. | Ulm-pro_D06_BDV01579_run4_Rbcl_R |
| Ulmus | Ulmus procera Salisb. | Ulm-pro_G06_BDV00322_run4_Rbcl_F |
| Ulmus | Ulmus procera Salisb. | Ulm-pro_G06_BDV01579_run4_Rbcl_F |
| Ulmus | Ulmus procera Salisb. | Ulm-pro_G06_BDV01579_run4_Rbcl_R |
| Vitex | Vitex agnus-castus L. | U78716.1 |
| Zelkova | Zelkova abelicea (Lam.) Boiss. | MF706353.1 |
| Zelkova | Zelkova sicula Di Pasquale, Garfi & Quézel | MF706354.1 |

**Appendix S4-3.** Genus and species sequence description for *trnH-psbA* (non-Mediterranean species appear in bold). Sequence codes include published NCBI references (starting with a two-letter code) and our own (starting with a six-letter code for INRA and with CNR of the CNR sequences).

| **Genus** | **Species** | **Sequence reference code** |
| --- | --- | --- |
| Abies | Abies alba Mill. | FJ493291.1 |
| Abies | Abies alba Mill. | FR832520.2 |
| Abies | Abies alba Mill. | FR832521.2 |
| Abies | Abies alba Mill. | FR832522.2 |
| Abies | Abies alba Mill. | Abi-alb_B01_SI00684_run2_TRNH_F |
| Abies | Abies alba Mill. | Abi-alb_F12_SI00684_run2_TRNH_F |
| Abies | Abies alba Mill. | Abi-alb_B01_SI00684_run2_TRNH_R |
| Abies | Abies alba Mill. | Abi-alb_F12_SI00684_run2_TRNH_R |
| Abies | Abies borisii-regis Mattf. | Abi-reg_C01_SI00166_run1_TRNH_R |
| Abies | Abies borisii-regis Mattf. | Abi-reg_C01_SI00166_run1_TRNH_F |
| Abies | Abies cephalonica Loudon | Abi-cep_A01_SI00166_run1_TRNH_R |
| Abies | Abies cephalonica Loudon | Abi-cep_D03_SI00166_run1_TRNH_R |
| Abies | Abies cephalonica Loudon | FR832518.2 |
| Abies | Abies cephalonica Loudon | Abi-cep_A01_SI00166_run1_TRNH_F |
| Abies | Abies cephalonica Loudon | Abi-cep_D03_SI00166_run1_TRNH_F |
| Abies | Abies nebrodensis (Lojac.) Mattei | Abi-neb_C12_SI00684_run2_TRNH_F |
| Abies | Abies nebrodensis (Lojac.) Mattei | FR832517.2 |
| Abies | Abies nebrodensis (Lojac.) Mattei | Abi-neb_C12_SI00684_run2_TRNH_R |
| Abies | Abies pinsapo Boiss. | FR832519.2 |
| Abies | Abies pinsapo Boiss. | Abi-pin_C12_BDV01577_run4_TRNH_F |
| Abies | Abies pinsapo Boiss. | Abi-pin_D12_BDV01577_run4_TRNH_F |
| Acer | Acer campestre L. | KU672741.1 |
| Acer | Acer campestre L. | KU672740.1 |
| Acer | Acer campestre L. | KU672731.1 |
| Acer | Acer campestre L. | KU672732.1 |
| Acer | Acer campestre L. | KU672736.1 |
| Acer | Acer campestre L. | KU672737.1 |
| Acer | Acer campestre L. | KU672749.1 |
| Acer | Acer campestre L. | Ace-cam_A02_BDV01577_run4_TRNH_F |
| Acer | Acer monspessulanum L. | Ace-mon_F03_BDV01577_run4_TRNH_F |
| Acer | Acer monspessulanum L. | Ace-mon_F03_BDV01577_run4_TRNH_R |
| Acer | Acer monspessulanum L. | KU672773.1 |
| Acer | Acer monspessulanum L. | KU672774.1 |
| Acer | Acer monspessulanum L. | KU672775.1 |
| Acer | Acer monspessulanum L. | KU672776.1 |
| Acer | Acer monspessulanum L. | KU672777.1 |
| Acer | Acer monspessulanum L. | KU672778.1 |
| Acer | Acer monspessulanum L. | KU672779.1 |
| Acer | Acer monspessulanum L. | KU672780.1 |
| Acer | Acer monspessulanum L. | KU672781.1 |
| Acer | Acer opalus Mill. | Ace-opa_E02_BDV01577_run4_TRNH_F |
| Acer | Acer opalus Mill. | Ace-opa_E02_BDV01577_run4_TRNH_R |
| Acer | Acer opalus Mill. | KU672784.1 |
| Acer | Acer opalus Mill. | KU672785.1 |
| Acer | Acer opalus Mill. | KU672786.1 |
| Acer | Acer opalus Mill. | KU672787.1 |
| Acer | Acer opalus Mill. | KU672788.1 |
| Acer | Acer opalus Mill. | KU672789.1 |
| Acer | Acer opalus Mill. | KU672790.1 |
| Acer | Acer opalus Mill. | KU672791.1 |
| Acer | Acer opalus Mill. | KU672792.1 |
| Acer | Acer opalus Mill. | KU672795.1 |
| Acer | Acer opalus Mill. | KU672797.1 |
| Acer | Acer opalus Mill. | FN687504.1 |
| Acer | Acer platanoides L. | Ace-pla_B02_BDV01577_run4_TRNH_F |
| Acer | Acer platanoides L. | DQ978619.1 |
| Acer | Acer platanoides L. | EU750430.1 |
| Acer | Acer platanoides L. | KU672758.1 |
| Acer | Acer platanoides L. | KU672759.1 |
| Acer | Acer platanoides L. | KU672760.1 |
| Acer | Acer platanoides L. | KU672761.1 |
| Acer | Acer platanoides L. | KU672762.1 |
| Acer | Acer platanoides L. | KU672763.1 |
| Acer | Acer platanoides L. | KU672765.1 |
| Acer | Acer platanoides L. | KU672770.1 |
| Acer | Acer platanoides L. | KU672771.1 |
| Acer | Acer pseudoplatanus L. | FN687503.1 |
| Acer | Acer pseudoplatanus L. | HE966461.1 |
| Acer | Acer pseudoplatanus L. | KU672807.1 |
| Acer | Acer pseudoplatanus L. | KU672808.1 |
| Acer | Acer pseudoplatanus L. | KU672810.1 |
| Acer | Acer pseudoplatanus L. | KU672811.1 |
| Acer | Acer pseudoplatanus L. | KU672812.1 |
| Acer | Acer pseudoplatanus L. | KU672813.1 |
| Acer | Acer pseudoplatanus L. | KU672814.1 |
| Acer | Acer pseudoplatanus L. | KU672815.1 |
| Acer | Acer pseudoplatanus L. | KU672816.1 |
| Acer | Acer tataricum L. | JN043729.1 |
| Acer | Acer tataricum L. | JN043730.1 |
| Aesculus | Aesculus hippocastanum L. | EU703839.1 |
| Aesculus | Aesculus hippocastanum L. | HE966463.1 |
| Aesculus | Aesculus hippocastanum L. | HG764963.1 |
| Aesculus | Aesculus hippocastanum L. | HG764964.1 |
| Aesculus | Aesculus hippocastanum L. | Aes-hip_D10_BDV00319_run3_TRNH_F |
| Aesculus | Aesculus hippocastanum L. | Aes-hip_D10_BDV00319_run3_TRNH_R |
| Alnus | Alnus cordata (Loisel.) Loisel. | FJ844542.1 |
| Alnus | Alnus cordata (Loisel.) Loisel. | FJ844543.1 |
| Alnus | Alnus cordata (Loisel.) Loisel. | FJ844544.1 |
| Alnus | Alnus glutinosa (L.) Gaertn. | FJ844535.1 |
| Alnus | Alnus glutinosa (L.) Gaertn. | FJ844536.1 |
| Alnus | Alnus glutinosa (L.) Gaertn. | FJ844537.1 |
| Alnus | Alnus glutinosa (L.) Gaertn. | FJ844538.1 |
| Alnus | Alnus glutinosa (L.) Gaertn. | FJ844539.1 |
| Alnus | Alnus incana (L.) Moench | FJ844532.1 |
| Alnus | Alnus incana (L.) Moench | FJ844533.1 |
| Alnus | Alnus incana (L.) Moench | FJ844534.1 |
| Alnus | Alnus orientalis Decne. | FJ844551.1 |
| Alnus | Alnus orientalis Decne. | FJ844552.1 |
| Alnus | Alnus viridis | FJ844483.1 |
| Alnus | Alnus viridis | FJ844484.1 |
| Alnus | Alnus viridis | FJ844487.1 |
| Alnus | Alnus viridis | FJ844488.1 |
| Arbutus | Arbutus unedo L. | KU205821.1 |
| Arbutus | Arbutus unedo L. | KU205822.1 |
| Arbutus | Arbutus unedo L. | KU205823.1 |
| Arbutus | Arbutus unedo L. | KU205824.1 |
| Arbutus | Arbutus unedo L. | KU205825.1 |
| Arbutus | Arbutus unedo L. | KU205826.1 |
| Arbutus | Arbutus unedo L. | KU205827.1 |
| Arbutus | Arbutus unedo L. | KU205828.1 |
| Arbutus | Arbutus unedo L. | KU205830.1 |
| Arbutus | Arbutus unedo L. | KU205839.1 |
| Arbutus | Arbutus unedo L. | KU205840.1 |
| Arbutus | Arbutus unedo L. | KU205841.1 |
| Arbutus | Arbutus unedo L. | Arb-une_E07_BDV01577_run4_TRNH_F |
| Arbutus | Arbutus unedo L. | Arb-une_E07_BDV01577_run4_TRNH_R |
| Betula | Betula pendula Roth | FJ011881.1 |
| Betula | Betula pendula Roth | GQ248254.1 |
| Betula | Betula pendula Roth | JN247424.1 |
| Buxus | Buxus sempervirens L. | HE966523.1 |
| Buxus | Buxus sempervirens L. | HE966524.1 |
| Buxus | Buxus sempervirens L. | HE966525.1 |
| Buxus | Buxus sempervirens L. | FJ493272.1 |
| Buxus | Buxus sempervirens L. | Bux-sem_A08_BDV00319_run3_TRNH_F |
| Buxus | Buxus sempervirens L. | Bux-sem_A08_BDV00319_run3_TRNH_R |
| Buxus | Buxus sempervirens L. | Bux-sem_F10_BDV00319_run3_TRNH_F |
| Buxus | Buxus sempervirens L. | Bux-sem_F10_BDV00319_run3_TRNH_R |
| Carpinus | Carpinus betulus L. | AY211429.1 |
| Carpinus | Carpinus betulus L. | FJ011833.1 |
| Carpinus | Carpinus betulus L. | FJ395523.1 |
| Carpinus | Carpinus betulus L. | Car-bet_C02_BDV01577_run4_TRNH_F |
| Carpinus | Carpinus betulus L. | Car-bet_C02_BDV01577_run4_TRNH_R |
| Castanea | Castanea sativa Mill. | KP096456.1 |
| Castanea | Castanea sativa Mill. | Cas-sat_G02_BDV01577_run4_TRNH_F |
| Castanea | Castanea sativa Mill. | Cas-sat_G02_BDV01577_run4_TRNH_R |
| Cedrus | Cedrus brevifolia | Ced-bre_A09_SI00166_run1_TRNH_F |
| Cedrus | Cedrus libani A. Richard | HG764975.1 |
| Cedrus | Cedrus libani A. Richard | HG764976.1 |
| Cedrus | Cedrus libani A. Richard | HG764977.1 |
| Cedrus | Cedrus libani A. Richard | Ced-lib_A08_SI00166_run1_TRNH_F |
| Cedrus | Cedrus libani A. Richard | Ced-lib_A08_SI00166_run1_TRNH_R |
| Cedrus | Cedrus libani A. Richard | Ced-lib_E07_SI00166_run1_TRNH_F |
| Cedrus | Cedrus libani A. Richard | Ced-lib_E07_SI00166_run1_TRNH_R |
| Cedrus | Cedrus libani A. Richard | Ced-lib_F07_SI00166_run1_TRNH_F |
| Cedrus | Cedrus libani A. Richard | Ced-lib_F07_SI00166_run1_TRNH_R |
| Cedrus | Cedrus libani A. Richard | Ced-lib_G07_SI00166_run1_TRNH_F |
| Cedrus | Cedrus libani A. Richard | Ced-lib_G07_SI00166_run1_TRNH_R |
| Cedrus | Cedrus libani A. Richard | Ced-lib_H07_SI00166_run1_TRNH_F |
| Cedrus | Cedrus libani A. Richard | Ced-lib_H07_SI00166_run1_TRNH_R |
| Celtis | Celtis australis L. | HE966552.1 |
| Celtis | Celtis australis L. | Cel-aus_A07_BDV00319_run3_TRNH_F |
| Celtis | Celtis australis L. | Cel-aus_A07_BDV00319_run3_TRNH_R |
| Celtis | Celtis australis L. | Cel-aus_H05_BDV00319_run3_TRNH_F |
| Celtis | Celtis australis L. | Cel-aus_H05_BDV00319_run3_TRNH_R |
| Ceratonia | Ceratonia siliqua L. | CNR_pending |
| Cercis | Cercis siliquastrum L. | HE966555.1 |
| Cercis | Cercis siliquastrum L. | Cer-sil_G06_BDV00319_run3_TRNH_F |
| Cercis | Cercis siliquastrum L. | Cer-sil_G06_BDV00319_run3_TRNH_R |
| Chamaerops | Chamaerops humilis L. | CNR_pending |
| Corylus | Corylus avellana L. | FR865092.1 |
| Corylus | Corylus avellana L. | FJ011848.1 |
| Cotinus | Cotinus coggygria Scop. | HE966584 |
| Cotinus | Cotinus coggygria Scop. | KF682059 |
| Cotinus | Cotinus coggygria Scop. | KF682063 |
| Cotinus | Cotinus coggygria Scop. | KF682064 |
| Cotinus | Cotinus coggygria Scop. | KF682065 |
| Cotinus | Cotinus coggygria Scop. | MF348807 |
| Cotoneaster | Cotoneaster granatensis Boiss. | CNR_pending |
| Crataegus | Crataegus azarolus L. | HG764978.1 |
| Crataegus | Crataegus azarolus L. | HG764979.1 |
| Crataegus | Crataegus azarolus L. | HG764980.1 |
| Crataegus | Crataegus heldreichii Boiss. | EF127127.1 |
| Crataegus | Crataegus heldreichii Boiss. | EU500295.1 |
| Crataegus | Crataegus heldreichii Boiss. | KC251582.1 |
| Crataegus | Crataegus laevigata (Poir.) DC. | EF127130.1 |
| Crataegus | Crataegus laevigata (Poir.) DC. | EU500297.1 |
| Crataegus | Crataegus laevigata (Poir.) DC. | KC251590.1 |
| Crataegus | Crataegus laevigata (Poir.) DC. | KC251591.1 |
| Crataegus | Crataegus laevigata (Poir.) DC. | KC251592.1 |
| Crataegus | Crataegus monogyna Jacq. | FN687519.1 |
| Crataegus | Crataegus monogyna Jacq. | HG764982.1 |
| Crataegus | Crataegus monogyna Jacq. | JQ390769.1 |
| Crataegus | Crataegus monogyna Jacq. | HG764983.1 |
| Crataegus | Crataegus monogyna Jacq. | HG764984.1 |
| Crataegus | Crataegus monogyna Jacq. | HG937794.1 |
| Crataegus | Crataegus monogyna Jacq. | EF127128.1 |
| Crataegus | Crataegus monogyna Jacq. | KC251611.1 |
| Crataegus | Crataegus monogyna Jacq. | KC251620.1 |
| Crataegus | Crataegus pentagyna Willd. | HG937796.1 |
| Crataegus | Crataegus pentagyna Willd. | EF127131.1 |
| Crataegus | Crataegus pentagyna Willd. | EU682702.1 |
| Crataegus | Crataegus pentagyna Willd. | KC207058.1 |
| Crataegus | Crataegus pentagyna Willd. | KC207067.1 |
| Crataegus | Crataegus pentagyna Willd. | KC251635.1 |
| Crataegus | Crataegus pentagyna Willd. | KC251636.1 |
| Crataegus | Crataegus pentagyna Willd. | KC251637.1 |
| Crataegus | Crataegus pentagyna Willd. | KC251638.1 |
| Cupressus | Cupressus sempervirens L. | FR832556.1 |
| Cupressus | Cupressus sempervirens L. | FR832557.1 |
| Cupressus | Cupressus sempervirens L. | FR832558.1 |
| Cupressus | Cupressus sempervirens L. | Cup-sem_D01_SI00684_run2_TRNH_F |
| Cupressus | Cupressus sempervirens L. | Cup-sem_D01_SI00684_run2_TRNH_R |
| Cupressus | Cupressus sempervirens L. | Cup-sem_D03_SI00684_run2_TRNH_F |
| Cupressus | Cupressus sempervirens L. | Cup-sem_D03_SI00684_run2_TRNH_R |
| Cupressus | Cupressus sempervirens L. | Cup-sem_E03_SI00684_run2_TRNH_F |
| Cupressus | Cupressus sempervirens L. | Cup-sem_E03_SI00684_run2_TRNH_R |
| Cupressus | Cupressus sempervirens L. | Cup-sem_F03_SI00684_run2_TRNH_F |
| Cupressus | Cupressus sempervirens L. | Cup-sem_F03_SI00684_run2_TRNH_R |
| Cupressus | Cupressus sempervirens L. | Cup-sem_G03_SI00684_run2_TRNH_F |
| Cupressus | Cupressus sempervirens L. | Cup-sem_G03_SI00684_run2_TRNH_R |
| Cytisus | Cytisus aeolicus Guss. | CNR_pending |
| Erica | Erica arborea L. | GU323821.1 |
| Erica | Erica arborea L. | GU323883.1 |
| Erica | Erica arborea L. | GU323884.1 |
| Erica | Erica arborea L. | GU323885.1 |
| Erica | Erica arborea L. | GU323886.1 |
| Fagus | Fagus sylvatica L. | FN687511.1 |
| Fagus | Fagus sylvatica L. | KU509025.1 |
| Fagus | Fagus sylvatica L. | Fag-syl_B03_BDV01577_run4_TRNH_F |
| Fagus | Fagus sylvatica L. | Fag-syl_B03_BDV01577_run4_TRNH_R |
| Ficus | Ficus carica L. | KM456203.1 |
| Ficus | Ficus carica L. | KM456204.1 |
| Ficus | Ficus carica L. | KM456205.1 |
| Ficus | Ficus carica L. | KM456206.1 |
| Ficus | Ficus carica L. | KM456207.1 |
| Ficus | Ficus carica L. | KM456208.1 |
| Ficus | Ficus carica L. | KM456209.1 |
| Ficus | Ficus carica L. | KC584953.1 |
| Fontanesia | Fontanesia phillyreoides Labill | GU120318.1 |
| Fontanesia | Fontanesia phillyreoides Labill | MG255754.1 |
| Frangula | Frangula alnus Mill. | EU750522.1 |
| Frangula | Frangula alnus Mill. | EU750523.1 |
| Fraxinus | Fraxinus angustifolia Vahl | GU120315.1 |
| Fraxinus | Fraxinus angustifolia Vahl | HE966640.1 |
| Fraxinus | Fraxinus angustifolia Vahl | HG764987.1 |
| Fraxinus | Fraxinus angustifolia Vahl | HG764988.1 |
| Fraxinus | Fraxinus angustifolia Vahl | HG764989.1 |
| Fraxinus | Fraxinus angustifolia Vahl | HM367366.1 |
| Fraxinus | Fraxinus angustifolia Vahl | HM367367.1 |
| Fraxinus | Fraxinus angustifolia Vahl | HM367369.1 |
| Fraxinus | Fraxinus angustifolia Vahl | HM367370.1 |
| Fraxinus | Fraxinus angustifolia Vahl | Fra-ang_C06_BDV00319_run3_TRNH_F |
| Fraxinus | Fraxinus angustifolia Vahl | Fra-ang_C06_BDV00319_run3_TRNH_R |
| Fraxinus | Fraxinus excelsior L. | HG764995.1 |
| Fraxinus | Fraxinus excelsior L. | HG764996.1 |
| Fraxinus | Fraxinus excelsior L. | HM367417.1 |
| Fraxinus | Fraxinus excelsior L. | HM367419.1 |
| Fraxinus | Fraxinus excelsior L. | HM367421.1 |
| Fraxinus | Fraxinus excelsior L. | HM367422.1 |
| Fraxinus | Fraxinus excelsior L. | GU120316.1 |
| Fraxinus | Fraxinus excelsior L. | Fra-exc_F08_BDV00319_run3_TRNH_F |
| Fraxinus | Fraxinus excelsior L. | Fra-exc_F08_BDV00319_run3_TRNH_R |
| Fraxinus | Fraxinus excelsior L. | Fra-exc_H09_BDV00319_run3_TRNH_R |
| Fraxinus | Fraxinus ornus L. | HG764990.1 |
| Fraxinus | Fraxinus ornus L. | HG764991.1 |
| Fraxinus | Fraxinus ornus L. | HG764992.1 |
| Fraxinus | Fraxinus ornus L. | HG764993.1 |
| Fraxinus | Fraxinus ornus L. | HG764994.1 |
| Fraxinus | Fraxinus ornus L. | HM367500.1 |
| Fraxinus | Fraxinus ornus L. | HM367501.1 |
| Fraxinus | Fraxinus ornus L. | HM367502.1 |
| Fraxinus | Fraxinus ornus L. | HM367505.1 |
| Fraxinus | Fraxinus ornus L. | GU120317.1 |
| Fraxinus | Fraxinus ornus L. | Fra-orn_C11_BDV00319_run3_TRNH_R |
| Fraxinus | Fraxinus ornus L. | Fra-orn_D07_BDV01577_run4_TRNH_F |
| Fraxinus | Fraxinus ornus L. | Fra-orn_D07_BDV01577_run4_TRNH_R |
| Genista | Genista tyrrhena Valsecchi | CNR_pending |
| Ilex | Ilex aquifolium L. | FN675791.1 |
| Ilex | Ilex aquifolium L. | HE966666.1 |
| Ilex | Ilex aquifolium L. | HG764997.1 |
| Ilex | Ilex aquifolium L. | HG764998.1 |
| Ilex | Ilex aquifolium L. | HG764999.1 |
| Ilex | Ilex aquifolium L. | HG765000.1 |
| Ilex | Ilex aquifolium L. | EU359337.1 |
| Ilex | Ilex aquifolium L. | FJ395543.1 |
| Ilex | Ilex aquifolium L. | Ile-aqu_C01_BDV01577_run4_TRNH_R |
| Juglans | Juglans regia L. | AY293344.1 |
| Juglans | Juglans regia L. | HE659564.1 |
| Juglans | Juglans regia L. | HE966671.1 |
| Juglans | Juglans regia L. | GQ435024.1 |
| Juglans | Juglans regia L. | Jug-reg_H02_BDV01577_run4_TRNH_F |
| Juglans | Juglans regia L. | Jug-reg_H02_BDV01577_run4_TRNH_R |
| Juniperus | Juniperus communis L. | FR832568.1 |
| Juniperus | Juniperus communis L. | FR865108.1 |
| Juniperus | Juniperus communis L. | HQ832762.1 |
| Juniperus | Juniperus communis L. | HQ832763.1 |
| Juniperus | Juniperus communis L. | JQ512307.1 |
| Juniperus | Juniperus communis L. | JQ512308.1 |
| Juniperus | Juniperus communis L. | JQ512309.1 |
| Juniperus | Juniperus communis L. | JQ512310.1 |
| Juniperus | Juniperus communis L. | EU750614.1 |
| Juniperus | Juniperus communis L. | EU750615.1 |
| Juniperus | Juniperus communis L. | EU750616.1 |
| Juniperus | Juniperus communis L. | Jun-com_A11_BDV00319_run3_TRNH_F |
| Juniperus | Juniperus communis L. | Jun-com_D02_SI00684_run2_TRNH_F |
| Juniperus | Juniperus oxycedrus L. | FR832565.1 |
| Juniperus | Juniperus oxycedrus L. | Jun-oxy_A06_BDV00319_run3_TRNH_F |
| Juniperus | Juniperus oxycedrus L. | Jun-oxy_A06_BDV00319_run3_TRNH_R |
| Juniperus | Juniperus oxycedrus L. | Jun-oxy_C03_SI00684_run2_TRNH_F |
| Juniperus | Juniperus oxycedrus L. | Jun-oxy_C03_SI00684_run2_TRNH_R |
| Juniperus | Juniperus phoenicea L. | FN689390.1 |
| Juniperus | Juniperus phoenicea L. | FR832560.1 |
| Juniperus | Juniperus phoenicea L. | FR832561.1 |
| Juniperus | Juniperus phoenicea L. | FR832562.1 |
| Juniperus | Juniperus phoenicea L. | Jun-pho_B06_SI00684_run2_TRNH_F |
| Juniperus | Juniperus phoenicea L. | Jun-pho_B06_SI00684_run2_TRNH_R |
| Juniperus | Juniperus phoenicea L. | Jun-pho_F06_BDV00319_run3_TRNH_F |
| Juniperus | Juniperus phoenicea L. | Jun-pho_F06_BDV00319_run3_TRNH_R |
| Juniperus | Juniperus phoenicea L. | Jun-pho_G02_SI00684_run2_TRNH_F |
| Juniperus | Juniperus phoenicea L. | Jun-pho_G02_SI00684_run2_TRNH_R |
| Laurus | Laurus nobilis L. | HE966685.1 |
| Laurus | Laurus nobilis L. | FJ493285.1 |
| Laurus | Laurus nobilis L. | EU153959.1 |
| Laurus | Laurus nobilis L. | HM019399.1 |
| Laurus | Laurus nobilis L. | HM019400.1 |
| Laurus | Laurus nobilis L. | KU160272.1 |
| Laurus | Laurus nobilis L. | Lau-nob_C08_BDV00319_run3_TRNH_R |
| Liquidambar | Liquidambar orientalis Miller | EF138729.1 |
| Liquidambar | Liquidambar orientalis Miller | EU595855.1 |
| Lonicera | Lonicera arborea Boiss. | CNR_pending |
| Malus | Malus florentina (Zuccagni) C.K. Schneider | KX499856.1 |
| Myrica | Myrica faya Aiton | CNR_pending |
| Myrtus | Myrtus communis L. | JQ730677.1 |
| Myrtus | Myrtus communis L. | FJ611339.1 |
| Myrtus | Myrtus communis L. | FJ611340.1 |
| Myrtus | Myrtus communis L. | FJ611341.1 |
| Myrtus | Myrtus communis L. | FJ611342.1 |
| Myrtus | Myrtus communis L. | HM014147.1 |
| Myrtus | Myrtus communis L. | HM014148.1 |
| Myrtus | Myrtus communis L. | HM014153.1 |
| Myrtus | Myrtus communis L. | HM014156.1 |
| Nerium | Nerium oleander L. | FN675803.1 |
| Nerium | Nerium oleander L. | EU531690.1 |
| Nerium | Nerium oleander L. | FJ493258.1 |
| Nerium | Nerium oleander L. | Ner-ole_E07_BDV00319_run3_TRNH_F |
| Nerium | Nerium oleander L. | Ner-ole_E07_BDV00319_run3_TRNH_R |
| Olea | Olea europaea L. | NC_013707.2 |
| Olea | Olea europaea L. | KT865620.1 |
| Olea | Olea europaea L. | KT865621.1 |
| Olea | Olea europaea L. | KT865622.1 |
| Olea | Olea europaea L. | KT865624.1 |
| Olea | Olea europaea L. | KT865625.1 |
| Olea | Olea europaea L. | KT865627.1 |
| Olea | Olea europaea L. | FJ493289.1 |
| Olea | Olea europaea L. | Ole-eur_A09_BDV00319_run3_TRNH_F |
| Olea | Olea europaea L. | Ole-eur_B10_BDV00319_run3_TRNH_F |
| Ostrya | Ostrya carpinifolia Scop. | AY211451.1 |
| Ostrya | Ostrya carpinifolia Scop. | HE966721.1 |
| Ostrya | Ostrya carpinifolia Scop. | FJ011860.1 |
| Phillyrea | Phillyrea angustifolia L. | GU120321.1 |
| Phillyrea | Phillyrea angustifolia L. | HE966732.1 |
| Phillyrea | Phillyrea angustifolia L. | Phy-ang_B04_BDV00319_run3_TRNH_F |
| Phillyrea | Phillyrea angustifolia L. | Phy-ang_B04_BDV00319_run3_TRNH_R |
| Phillyrea | Phillyrea latifolia L. | GU120322.1 |
| Phillyrea | Phillyrea latifolia L. | Phy-med_A03_BDV00319_run3_TRNH_F |
| Phillyrea | Phillyrea latifolia L. | Phy-med_A03_BDV00319_run3_TRNH_R |
| Phoenix | Phoenix theophrasti Greuter | CNR_pending |
| Pinus | Pinus brutia Ten. | FR832537.2 |
| Pinus | Pinus brutia Ten. | Pin-bru_A11_SI00166_run1_TRNH_F |
| Pinus | Pinus brutia Ten. | Pin-bru_A11_SI00166_run1_TRNH_R |
| Pinus | Pinus brutia Ten. | Pin-bru_B10_SI00166_run1_TRNH_F |
| Pinus | Pinus brutia Ten. | Pin-bru_B10_SI00166_run1_TRNH_R |
| Pinus | Pinus brutia Ten. | Pin-bru_C10_SI00166_run1_TRNH_F |
| Pinus | Pinus brutia Ten. | Pin-bru_C10_SI00166_run1_TRNH_R |
| Pinus | Pinus brutia Ten. | Pin-bru_D07_SI00684_run2_TRNH_F |
| Pinus | Pinus brutia Ten. | Pin-bru_D07_SI00684_run2_TRNH_R |
| Pinus | Pinus brutia Ten. | Pin-bru_D11_SI00684_run2_TRNH_R |
| Pinus | Pinus halepensis Miller | FR832528.2 |
| Pinus | Pinus halepensis Miller | FR832529.2 |
| Pinus | Pinus halepensis Miller | FR832530.2 |
| Pinus | Pinus halepensis Miller | EU531714.1 |
| Pinus | Pinus halepensis Miller | Pin-hal_B09_SI00166_run1_TRNH_F |
| Pinus | Pinus halepensis Miller | Pin-hal_B09_SI00166_run1_TRNH_R |
| Pinus | Pinus halepensis Miller | Pin-hal_B11_SI00684_run2_TRNH_F |
| Pinus | Pinus halepensis Miller | Pin-hal_B11_SI00684_run2_TRNH_R |
| Pinus | Pinus halepensis Miller | Pin-hal_C09_SI00166_run1_TRNH_F |
| Pinus | Pinus halepensis Miller | Pin-hal_C09_SI00166_run1_TRNH_R |
| Pinus | Pinus halepensis Miller | Pin-hal_D10_SI00166_run1_TRNH_F |
| Pinus | Pinus halepensis Miller | Pin-hal_D10_SI00166_run1_TRNH_R |
| Pinus | Pinus halepensis Miller | Pin-hal_D11_BDV01577_run4_TRNH_F |
| Pinus | Pinus halepensis Miller | Pin-hal_D11_BDV01577_run4_TRNH_R |
| Pinus | Pinus halepensis Miller | Pin-hal_E05_BDV00319_run3_TRNH_F |
| Pinus | Pinus halepensis Miller | Pin-hal_E05_BDV00319_run3_TRNH_R |
| Pinus | Pinus halepensis Miller | Pin-hal_E10_SI00166_run1_TRNH_F |
| Pinus | Pinus halepensis Miller | Pin-hal_E10_SI00166_run1_TRNH_R |
| Pinus | Pinus halepensis Miller | Pin-hal_E11_BDV01577_run4_TRNH_F |
| Pinus | Pinus halepensis Miller | Pin-hal_F10_SI00166_run1_TRNH_F |
| Pinus | Pinus halepensis Miller | Pin-hal_F10_SI00166_run1_TRNH_R |
| Pinus | Pinus halepensis Miller | Pin-hal_G10_SI00166_run1_TRNH_F |
| Pinus | Pinus halepensis Miller | Pin-hal_G10_SI00166_run1_TRNH_R |
| Pinus | Pinus halepensis Miller | Pin-hal_H05_SI00684_run2_TRNH_F |
| Pinus | Pinus halepensis Miller | Pin-hal_H05_SI00684_run2_TRNH_R |
| Pinus | Pinus heldreichii Christ | Pin-hel_A06_SI00166_run1_TRNH_F |
| Pinus | Pinus heldreichii Christ | Pin-hel_A06_SI00166_run1_TRNH_R |
| Pinus | Pinus heldreichii Christ | Pin-hel_B06_SI00166_run1_TRNH_F |
| Pinus | Pinus heldreichii Christ | Pin-hel_B06_SI00166_run1_TRNH_R |
| Pinus | Pinus mugo Turra | FR832533.2 |
| Pinus | Pinus mugo Turra | FR832534.2 |
| Pinus | Pinus mugo Turra | FR832535.2 |
| Pinus | Pinus mugo Turra | Pin-mug_A09_SI00684_run2_TRNH_F |
| Pinus | Pinus mugo Turra | Pin-mug_A09_SI00684_run2_TRNH_R |
| Pinus | Pinus nigra J.F. Arnold | FN689385.1 |
| Pinus | Pinus nigra J.F. Arnold | JQ512348.1 |
| Pinus | Pinus nigra J.F. Arnold | FJ493295.1 |
| Pinus | Pinus nigra J.F. Arnold | Pin-nig_A04_SI00166_run1_TRNH_R |
| Pinus | Pinus nigra J.F. Arnold | Pin-nig_C02_SI00166_run1_TRNH_F |
| Pinus | Pinus nigra J.F. Arnold | Pin-nig_C02_SI00166_run1_TRNH_R |
| Pinus | Pinus nigra J.F. Arnold | Pin-nig_E04_SI00166_run1_TRNH_R |
| Pinus | Pinus nigra J.F. Arnold | Pin-nig_F11_BDV01577_run4_TRNH_F |
| Pinus | Pinus nigra J.F. Arnold | Pin-nig_F11_BDV01577_run4_TRNH_R |
| Pinus | Pinus nigra J.F. Arnold | Pin-nig_F12_SI00166_run1_TRNH_F |
| Pinus | Pinus nigra J.F. Arnold | Pin-nig_F12_SI00166_run1_TRNH_R |
| Pinus | Pinus nigra J.F. Arnold | Pin-nig_G04_SI00166_run1_TRNH_F |
| Pinus | Pinus nigra J.F. Arnold | Pin-nig_G04_SI00166_run1_TRNH_R |
| Pinus | Pinus nigra J.F. Arnold | Pin-nig_G11_BDV01577_run4_TRNH_F |
| Pinus | Pinus nigra J.F. Arnold | Pin-nig_G11_BDV01577_run4_TRNH_R |
| Pinus | Pinus nigra J.F. Arnold | Pin-nig_G12_SI00166_run1_TRNH_F |
| Pinus | Pinus nigra J.F. Arnold | Pin-nig_G12_SI00166_run1_TRNH_R |
| Pinus | Pinus nigra J.F. Arnold | Pin-nig_H03_SI00166_run1_TRNH_R |
| Pinus | Pinus nigra J.F. Arnold | Pin-nig_H12_SI00166_run1_TRNH_F |
| Pinus | Pinus nigra J.F. Arnold | Pin-nig_H12_SI00166_run1_TRNH_R |
| Pinus | Pinus nigra J.F. Arnold | Pin-nig_H12_SI00684_run2_TRNH_F |
| Pinus | Pinus nigra J.F. Arnold | Pin-nig_H12_SI00684_run2_TRNH_R |
| Pinus | Pinus pinaster Aiton | FR832525.2 |
| Pinus | Pinus pinaster Aiton | FR832526.2 |
| Pinus | Pinus pinaster Aiton | FR832527.2 |
| Pinus | Pinus pinaster Aiton | Pin-ptr_B11_SI00166_run1_TRNH_F |
| Pinus | Pinus pinaster Aiton | Pin-ptr_B11_SI00166_run1_TRNH_R |
| Pinus | Pinus pinaster Aiton | Pin-ptr_C08_SI00684_run2_TRNH_F |
| Pinus | Pinus pinaster Aiton | Pin-ptr_C08_SI00684_run2_TRNH_R |
| Pinus | Pinus pinaster Aiton | Pin-ptr_C11_BDV01577_run4_TRNH_F |
| Pinus | Pinus pinaster Aiton | Pin-ptr_C11_BDV01577_run4_TRNH_R |
| Pinus | Pinus pinaster Aiton | Pin-ptr_C11_SI00166_run1_TRNH_F |
| Pinus | Pinus pinaster Aiton | Pin-ptr_C11_SI00166_run1_TRNH_R |
| Pinus | Pinus pinaster Aiton | Pin-ptr_D08_SI00684_run2_TRNH_F |
| Pinus | Pinus pinaster Aiton | Pin-ptr_D08_SI00684_run2_TRNH_R |
| Pinus | Pinus pinaster Aiton | Pin-ptr_D11_SI00166_run1_TRNH_F |
| Pinus | Pinus pinaster Aiton | Pin-ptr_D11_SI00166_run1_TRNH_R |
| Pinus | Pinus pinaster Aiton | Pin-ptr_E08_SI00684_run2_TRNH_F |
| Pinus | Pinus pinaster Aiton | Pin-ptr_E08_SI00684_run2_TRNH_R |
| Pinus | Pinus pinaster Aiton | Pin-ptr_E11_SI00166_run1_TRNH_F |
| Pinus | Pinus pinaster Aiton | Pin-ptr_E11_SI00166_run1_TRNH_R |
| Pinus | Pinus pinea L. | FN689389.1 |
| Pinus | Pinus pinea L. | FR832538.2 |
| Pinus | Pinus pinea L. | FR832539.2 |
| Pinus | Pinus pinea L. | FR832540.2 |
| Pinus | Pinus pinea L. | Pin-pin_A12_SI00166_run1_TRNH_F |
| Pinus | Pinus pinea L. | Pin-pin_A12_SI00166_run1_TRNH_R |
| Pinus | Pinus pinea L. | Pin-pin_B12_SI00166_run1_TRNH_F |
| Pinus | Pinus pinea L. | Pin-pin_B12_SI00166_run1_TRNH_R |
| Pinus | Pinus pinea L. | Pin-pin_C11_SI00684_run2_TRNH_F |
| Pinus | Pinus pinea L. | Pin-pin_C11_SI00684_run2_TRNH_R |
| Pinus | Pinus pinea L. | Pin-pin_C12_SI00166_run1_TRNH_F |
| Pinus | Pinus pinea L. | Pin-pin_C12_SI00166_run1_TRNH_R |
| Pinus | Pinus pinea L. | Pin-pin_D12_SI00166_run1_TRNH_F |
| Pinus | Pinus pinea L. | Pin-pin_D12_SI00166_run1_TRNH_R |
| Pinus | Pinus pinea L. | Pin-pin_E07_SI00684_run2_TRNH_F |
| Pinus | Pinus pinea L. | Pin-pin_E07_SI00684_run2_TRNH_R |
| Pinus | Pinus pinea L. | Pin-pin_E12_SI00166_run1_TRNH_F |
| Pinus | Pinus pinea L. | Pin-pin_E12_SI00166_run1_TRNH_R |
| Pinus | Pinus pinea L. | Pin-pin_F11_SI00166_run1_TRNH_F |
| Pinus | Pinus pinea L. | Pin-pin_F11_SI00166_run1_TRNH_R |
| Pinus | Pinus pinea L. | Pin-pin_G11_SI00166_run1_TRNH_F |
| Pinus | Pinus pinea L. | Pin-pin_G11_SI00166_run1_TRNH_R |
| Pinus | Pinus sylvestris L. | FR832541.2 |
| Pinus | Pinus sylvestris L. | FR832542.2 |
| Pinus | Pinus sylvestris L. | FR832543.1 |
| Pinus | Pinus sylvestris L. | EU750632.1 |
| Pinus | Pinus sylvestris L. | EU750633.1 |
| Pinus | Pinus sylvestris L. | EU750634.1 |
| Pinus | Pinus sylvestris L. | KM224618.1 |
| Pinus | Pinus sylvestris L. | Pin-syl_A12_BDV01577_run4_TRNH_F |
| Pinus | Pinus sylvestris L. | Pin-syl_A12_BDV01577_run4_TRNH_R |
| Pinus | Pinus sylvestris L. | Pin-syl_B07_SI00166_run1_TRNH_F |
| Pinus | Pinus sylvestris L. | Pin-syl_B07_SI00166_run1_TRNH_R |
| Pinus | Pinus sylvestris L. | Pin-syl_C06_SI00166_run1_TRNH_F |
| Pinus | Pinus sylvestris L. | Pin-syl_C06_SI00166_run1_TRNH_R |
| Pinus | Pinus sylvestris L. | Pin-syl_H04_SI00166_run1_TRNH_F |
| Pinus | Pinus sylvestris L. | Pin-syl_H04_SI00166_run1_TRNH_R |
| Pinus | Pinus sylvestris L. | Pin-syl_H11_BDV01577_run4_TRNH_F |
| Pinus | Pinus sylvestris L. | Pin-syl_H11_BDV01577_run4_TRNH_R |
| Pinus | Pinus uncinata Ramond ex DC. | Pin-unc_D06_SI00166_run1_TRNH_F |
| Pinus | Pinus uncinata Ramond ex DC. | Pin-unc_D06_SI00166_run1_TRNH_R |
| Pistacia | Pistacia atlantica Desf. | KF664284.1 |
| Pistacia | Pistacia atlantica Desf. | KF664285.1 |
| Pistacia | Pistacia atlantica Desf. | KF664286.1 |
| Pistacia | Pistacia lentiscus L | KF664294.1 |
| Pistacia | Pistacia lentiscus L | KF664295.1 |
| Pistacia | Pistacia lentiscus L | Pis-len_B07_BDV01577_run4_TRNH_F |
| Pistacia | Pistacia terebinthus L. | KF664299.1 |
| Pistacia | Pistacia terebinthus L. | KF664300.1 |
| Pistacia | Pistacia terebinthus L. | KF664301.1 |
| Platanus | Platanus orientalis L. | HE661218.1 |
| Platanus | Platanus orientalis L. | HE661219.1 |
| Platanus | Platanus orientalis L. | HE661220.1 |
| Platanus | Platanus orientalis L. | HE661221.1 |
| Platanus | Platanus orientalis L. | HE661222.1 |
| Populus | Populus alba L. | NC_008235.1 |
| Populus | Populus alba L. | AP008956.1 |
| Populus | Populus alba L. | FN687513.1 |
| Populus | Populus alba L. | JF429903.1 |
| Populus | Populus alba L. | GQ248375.1 |
| Populus | Populus nigra L. | FN687512.1 |
| Populus | Populus nigra L. | HE966752.1 |
| Populus | Populus nigra L. | KT970109.1 |
| Populus | Populus nigra L. | FJ493309.1 |
| Populus | Populus tremula L. | KT970099.1 |
| Populus | Populus tremula L. | GQ248376.1 |
| Prunus | Prunus avium L | FN675831.1 |
| Prunus | Prunus avium L | HQ188740.1 |
| Prunus | Prunus avium L | HQ188741.1 |
| Prunus | Prunus avium L | FJ395551.1 |
| Prunus | Prunus avium L | KP402435.1 |
| Prunus | Prunus avium L | KP402496.1 |
| Prunus | Prunus cerasifera Ehrh. | HE966759.1 |
| Prunus | Prunus cerasifera Ehrh. | HQ188750.1 |
| Prunus | Prunus cerasifera Ehrh. | HQ188751.1 |
| Prunus | Prunus cerasifera Ehrh. | HQ188752.1 |
| Prunus | Prunus cerasifera Ehrh. | FJ493306.1 |
| Prunus | Prunus cerasifera Ehrh. | AY500616.1 |
| Prunus | Prunus laurocerasus L | FN675834.1 |
| Prunus | Prunus laurocerasus L | HE966762.1 |
| Prunus | Prunus laurocerasus L | FJ493307.1 |
| Prunus | Prunus laurocerasus L | AY500635.1 |
| Prunus | Prunus mahaleb L. | HE966763.1 |
| Prunus | Prunus mahaleb L. | HQ188802.1 |
| Prunus | Prunus mahaleb L. | AY500631.1 |
| Prunus | Prunus mahaleb L. | Pru-mah_A01_BDV01577_run4_TRNH_F |
| Prunus | Prunus mahaleb L. | Pru-mah_A01_BDV01577_run4_TRNH_R |
| Prunus | Prunus padus L. | HQ188825.1 |
| Prunus | Prunus padus L. | HQ188826.1 |
| Pyrus | Pyrus spinosa Forssk. | HG737342.1 |
| Quercus | Quercus canariensis Willd. | HE591268.1 |
| Quercus | Quercus canariensis Willd. | HE591329.1 |
| Quercus | Quercus cerris L. | FN687487.1 |
| Quercus | Quercus cerris L. | FN687488.1 |
| Quercus | Quercus cerris L. | FN687489.1 |
| Quercus | Quercus cerris L. | HE591247.1 |
| Quercus | Quercus cerris L. | HE591248.1 |
| Quercus | Quercus cerris L. | HE591291.1 |
| Quercus | Quercus cerris L. | HE591292.1 |
| Quercus | Quercus coccifera L. | FN687472.1 |
| Quercus | Quercus coccifera L. | HE591261.1 |
| Quercus | Quercus coccifera L. | HE591262.1 |
| Quercus | Quercus coccifera L. | HE591300.1 |
| Quercus | Quercus coccifera L. | Que-coc_D02_BDV00319_run3_TRNH_F |
| Quercus | Quercus crenata Lam. | FN687484.1 |
| Quercus | Quercus crenata Lam. | FN687485.1 |
| Quercus | Quercus crenata Lam. | FN687486.1 |
| Quercus | Quercus crenata Lam. | HE591249.1 |
| Quercus | Quercus crenata Lam. | HE591250.1 |
| Quercus | Quercus crenata Lam. | HE591251.1 |
| Quercus | Quercus crenata Lam. | HE591293.1 |
| Quercus | Quercus faginea Lam. | HE591269.1 |
| Quercus | Quercus faginea Lam. | HE591270.1 |
| Quercus | Quercus frainetto Ten. | FN687498.1 |
| Quercus | Quercus frainetto Ten. | FN687499.1 |
| Quercus | Quercus frainetto Ten. | FN687500.1 |
| Quercus | Quercus frainetto Ten. | HE591271.1 |
| Quercus | Quercus frainetto Ten. | HE591272.1 |
| Quercus | Quercus frainetto Ten. | HE591279.1 |
| Quercus | Quercus frainetto Ten. | HE591313.1 |
| Quercus | Quercus ilex L. | FN687476.1 |
| Quercus | Quercus ilex L. | FN687477.1 |
| Quercus | Quercus ilex L. | FN687478.1 |
| Quercus | Quercus ilex L. | HE591265.1 |
| Quercus | Quercus ilex L. | HE591266.1 |
| Quercus | Quercus ilex L. | HE591267.1 |
| Quercus | Quercus ilex L. | HE591302.1 |
| Quercus | Quercus ilex L. | FJ395552.1 |
| Quercus | Quercus ilex L. | Que-ile_G08_BDV00319_run3_TRNH_F |
| Quercus | Quercus ilex L. | Que-ile_G08_BDV00319_run3_TRNH_R |
| Quercus | Quercus infectoria Olivier | HE591304.1 |
| Quercus | Quercus infectoria Olivier | HE591305.1 |
| Quercus | Quercus infectoria Olivier | HE591306.1 |
| Quercus | Quercus ithaburensis Decaisne | HE591253.1 |
| Quercus | Quercus ithaburensis Decaisne | HE591316.1 |
| Quercus | Quercus ithaburensis Decaisne | HE591317.1 |
| Quercus | Quercus ithaburensis Decaisne | HE591318.1 |
| Quercus | Quercus petraea (Mattusch.) Liebl | FN687495.1 |
| Quercus | Quercus petraea (Mattusch.) Liebl | FN687496.1 |
| Quercus | Quercus petraea (Mattusch.) Liebl | FN687497.1 |
| Quercus | Quercus petraea (Mattusch.) Liebl | HE591274.1 |
| Quercus | Quercus petraea (Mattusch.) Liebl | HE591282.1 |
| Quercus | Quercus petraea (Mattusch.) Liebl | HE591284.1 |
| Quercus | Quercus petraea (Mattusch.) Liebl | HE591307.1 |
| Quercus | Quercus petraea (Mattusch.) Liebl | HE591314.1 |
| Quercus | Quercus petraea (Mattusch.) Liebl | HE591323.1 |
| Quercus | Quercus petraea (Mattusch.) Liebl | HE591280.1 |
| Quercus | Quercus petraea (Mattusch.) Liebl | HE591326.1 |
| Quercus | Quercus petraea (Mattusch.) Liebl | HE591327.1 |
| Quercus | Quercus pubescens Willd. | FN687493.1 |
| Quercus | Quercus pubescens Willd. | FN687494.1 |
| Quercus | Quercus pubescens Willd. | FN687501.1 |
| Quercus | Quercus pubescens Willd. | HE591276.1 |
| Quercus | Quercus pubescens Willd. | HE591277.1 |
| Quercus | Quercus pubescens Willd. | HE591288.1 |
| Quercus | Quercus pubescens Willd. | HE591289.1 |
| Quercus | Quercus pubescens Willd. | HE591308.1 |
| Quercus | Quercus pubescens Willd. | HE591309.1 |
| Quercus | Quercus pubescens Willd. | HE966771.1 |
| Quercus | Quercus pyrenaica Willd. | HE591310.1 |
| Quercus | Quercus pyrenaica Willd. | HE591339.1 |
| Quercus | Quercus robur L. | FN687490.1 |
| Quercus | Quercus robur L. | FN687491.1 |
| Quercus | Quercus robur L. | FN687492.1 |
| Quercus | Quercus robur L. | HE591285.1 |
| Quercus | Quercus robur L. | HE591286.1 |
| Quercus | Quercus robur L. | HE591287.1 |
| Quercus | Quercus robur L. | HE591311.1 |
| Quercus | Quercus robur L. | HE591312.1 |
| Quercus | Quercus robur L. | FJ395542.1 |
| Quercus | Quercus suber L. | FN687480.1 |
| Quercus | Quercus suber L. | FN687481.1 |
| Quercus | Quercus suber L. | FN687482.1 |
| Quercus | Quercus suber L. | HE591254.1 |
| Quercus | Quercus suber L. | HE591255.1 |
| Quercus | Quercus suber L. | HE591256.1 |
| Quercus | Quercus suber L. | HE591296.1 |
| Quercus | Quercus suber L. | HE591297.1 |
| Quercus | Quercus suber L. | Que-sub_G07_BDV01577_run4_TRNH_R |
| Quercus | Quercus trojana Webb | FN687479.1 |
| Quercus | Quercus trojana Webb | HE591252.1 |
| Quercus | Quercus trojana Webb | HE591257.1 |
| Quercus | Quercus trojana Webb | HE591295.1 |
| Quercus | Quercus trojana Webb | HE591301.1 |
| Rhamnus | Rhamnus alaternus L. | Rha-ala_F03_BDV00319_run3_TRNH_F |
| Rhamnus | Rhamnus alaternus L. | Rha-ala_F03_BDV00319_run3_TRNH_R |
| Rhamnus | Rhamnus catharticus L. | EU750519.1 |
| Rhamnus | Rhamnus catharticus L. | EU750520.1 |
| Rhamnus | Rhamnus catharticus L. | EU750521.1 |
| Rhamnus | Rhamnus catharticus L. | HQ596812.1 |
| Rhamnus | Rhamnus catharticus L. | Rha-cat_F01_BDV01577_run4_TRNH_F |
| Rhododendron | **Rhododendron arboreum Sm.** | JN046748.1 |
| Salix | Salix alba L. | FN687514.1 |
| Salix | Salix alba L. | HQ596830.1 |
| Salix | Salix alba L. | GU373307.1 |
| Salix | Salix alba L. | KM003357.1 |
| Salix | Salix alba L. | GU373308.1 |
| Salix | Salix alba L. | GU373309.1 |
| Salix | Salix caprea L. | GU373294.1 |
| Salix | Salix caprea L. | GU373295.1 |
| Salix | Salix cinerea L. | GU373278.1 |
| Salix | Salix cinerea L. | GU373279.1 |
| Salix | Salix pentandra L. | GU373288.1 |
| Salix | Salix viminalis L. | GU373302.1 |
| Salix | Salix viminalis L. | GU373303.1 |
| Salix | Salix viminalis L. | KM003548.1 |
| Sambucus | Sambucus nigra L. | HE966791.1 |
| Sambucus | Sambucus nigra L. | HG765009.1 |
| Sambucus | Sambucus nigra L. | HG765010.1 |
| Sambucus | Sambucus nigra L. | HG765013.1 |
| Sambucus | Sambucus nigra L. | HG800569.1 |
| Sambucus | Sambucus nigra L. | KC584960.1 |
| Sambucus | Sambucus nigra L. | FJ395531.1 |
| Sambucus | Sambucus nigra L. | FJ395532.1 |
| Sambucus | Sambucus racemosa L. | FN675823.1 |
| Sambucus | Sambucus racemosa L. | HG765016.1 |
| Sambucus | Sambucus racemosa L. | HQ596834.1 |
| Searsia | Searsia tripartita (Ucria) Moffett | CNR_pending |
| Sorbus | Sorbus aria (L.) Crantz | HG765017.1 |
| Sorbus | Sorbus aria (L.) Crantz | HG765018.1 |
| Sorbus | Sorbus aria (L.) Crantz | GU592794.1 |
| Sorbus | Sorbus aria (L.) Crantz | FJ395468.1 |
| Sorbus | Sorbus aucuparia L. | HG765020.1 |
| Sorbus | Sorbus aucuparia L. | HG765021.1 |
| Sorbus | Sorbus aucuparia L. | GU592806.1 |
| Sorbus | Sorbus aucuparia L. | HQ596854.1 |
| Sorbus | Sorbus domestica L. | HG765022.1 |
| Sorbus | Sorbus domestica L. | HG765023.1 |
| Sorbus | Sorbus domestica L. | HG765024.1 |
| Sorbus | Sorbus torminalis (L.) Crantz | HE966832.1 |
| Sorbus | Sorbus torminalis (L.) Crantz | HG765025.1 |
| Sorbus | Sorbus torminalis (L.) Crantz | HG765026.1 |
| Sorbus | Sorbus torminalis (L.) Crantz | HG765027.1 |
| Sorbus | Sorbus torminalis (L.) Crantz | GU592801.1 |
| Spartium | Spartium junceum L. | HE966833.1 |
| Staphylea | Staphylea pinnata L. | CNR_pending |
| Styrax | **Styrax formosanus Matsum.** | KJ687173.1 |
| Tamarix | Tamarix gallica L. | HE659546.1 |
| Tamarix | Tamarix gallica L. | KC584958.1 |
| Tamarix | Tamarix laxa Willd. | KT377306.1 |
| Tamarix | Tamarix laxa Willd. | KT377307.1 |
| Tamarix | Tamarix passerinoides Del. ex Desf. | KC840659.1 |
| Tamarix | Tamarix passerinoides Del. ex Desf. | KC840660.1 |
| Tamarix | Tamarix ramosissima Ledeb. | KT448725.1 |
| Tamarix | Tamarix ramosissima Ledeb. | KT377302.1 |
| Taxus | Taxus baccata L. | HE966843.1 |
| Taxus | Taxus baccata L. | JX188491.1 |
| Taxus | Taxus baccata L. | JX188494.1 |
| Taxus | Taxus baccata L. | JX188496.1 |
| Taxus | Taxus baccata L. | JX188497.1 |
| Taxus | Taxus baccata L. | JX188498.1 |
| Taxus | Taxus baccata L. | JX188499.1 |
| Taxus | Taxus baccata L. | EF017303.1 |
| Taxus | Taxus baccata L. | HM591111.1 |
| Taxus | Taxus baccata L. | HM591112.1 |
| Taxus | Taxus baccata L. | HM591115.1 |
| Taxus | Taxus baccata L. | Tax-bac_A12_SI00684_run2_TRNH_F |
| Taxus | Taxus baccata L. | Tax-bac_A12_SI00684_run2_TRNH_R |
| Taxus | Taxus baccata L. | Tax-bac_B12_SI00684_run2_TRNH_F |
| Taxus | Taxus baccata L. | Tax-bac_B12_SI00684_run2_TRNH_R |
| Taxus | Taxus baccata L. | Tax-bac_E11_SI00684_run2_TRNH_F |
| Taxus | Taxus baccata L. | Tax-bac_E11_SI00684_run2_TRNH_R |
| Taxus | Taxus baccata L. | Tax-bac_F11_SI00684_run2_TRNH_R |
| Tetraclinis | Tetraclinis articulata (Vahl) Masters | CNR_pending |
| Tilia | Tilia cordata Miller | HE966847.1 |
| Ulmus | Ulmus glabra Hudson | Ulm-gla_D05_BDV01577_run4_TRNH_F |
| Ulmus | Ulmus glabra Hudson | Ulm-gla_D05_BDV01577_run4_TRNH_R |
| Ulmus | Ulmus glabra Hudson | Ulm-gla_E05_BDV01577_run4_TRNH_F |
| Ulmus | Ulmus glabra Hudson | Ulm-gla_E05_BDV01577_run4_TRNH_R |
| Ulmus | Ulmus minor Mill. | Ulm-min_A05_BDV01577_run4_TRNH_F |
| Ulmus | Ulmus minor Mill. | Ulm-min_A05_BDV01577_run4_TRNH_R |
| Ulmus | Ulmus minor Mill. | Ulm-min_C04_BDV01577_run4_TRNH_F |
| Ulmus | Ulmus minor Mill. | Ulm-min_C04_BDV01577_run4_TRNH_R |
| Ulmus | Ulmus minor Mill. | Ulm-min_D04_BDV01577_run4_TRNH_R |
| Ulmus | Ulmus minor Mill. | Ulm-min_F05_BDV01577_run4_TRNH_F |
| Ulmus | Ulmus minor Mill. | Ulm-min_F05_BDV01577_run4_TRNH_R |
| Ulmus | Ulmus minor Mill. | Ulm-min_G04_BDV00319_run3_TRNH_F |
| Ulmus | Ulmus minor Mill. | Ulm-min_G04_BDV00319_run3_TRNH_R |
| Ulmus | Ulmus procera Salisb. | Ulm-pro_D06_BDV01577_run4_TRNH_F |
| Ulmus | Ulmus procera Salisb. | Ulm-pro_D06_BDV01577_run4_TRNH_R |
| Ulmus | Ulmus procera Salisb. | Ulm-pro_G06_BDV01577_run4_TRNH_F |
| Ulmus | Ulmus procera Salisb. | Ulm-pro_G06_BDV01577_run4_TRNH_R |
| Vitex | Vitex agnus-castus L. | MG947164.1 |
| Zelkova | Zelkova abelicea (Lam.) Boiss. | JX399127.1 |
| Zelkova | Zelkova abelicea (Lam.) Boiss. | JX399128.1 |
| Zelkova | Zelkova abelicea (Lam.) Boiss. | JX399129.1 |
| Zelkova | Zelkova abelicea (Lam.) Boiss. | JX399130.1 |
| Zelkova | Zelkova abelicea (Lam.) Boiss. | JX399131.1 |
| Zelkova | Zelkova sicula Di Pasquale, Garfi & Quézel | JX399137.1 |
| Zelkova | Zelkova sicula Di Pasquale, Garfi & Quézel | JX399138.1 |

**Appendix S5.** Mating system related trait data for the 64 Mediterranean Europe tree genera (Pollination type, breeding system type and seed dispersal type).

| Genus | Pollination abiotic | Pollination biotic | Mating Herm | Mating Unisex Mono | Mating Unisex Dio | Disp Abiotic | Disp Animal |
| --- | --- | --- | --- | --- | --- | --- | --- |
| *Abies* | 1 | 0 | 0 | 1 | 0 | 1 | 0 |
| *Acer* | 0 | 1 | 1 | 1 | 0 | 1 | 0 |
| *Aesculus* | 0 | 1 | 1 | 1 | 0 | 0 | 1 |
| *Alnus* | 1 | 0 | 0 | 1 | 0 | 1 | 0 |
| *Arbutus* | 0 | 1 | 1 | 0 | 0 | 0 | 1 |
| *Betula* | 1 | 0 | 0 | 1 | 0 | 1 | 0 |
| *Buxus* | 1 | 1 | 1 | 0 | 0 | 1 | 1 |
| *Carpinus* | 1 | 0 | 0 | 1 | 0 | 1 | 0 |
| *Castanea* | 1 | 1 | 0 | 1 | 0 | 0 | 1 |
| *Cedrus* | 1 | 0 | 0 | 1 | 0 | 1 | 0 |
| *Celtis* | 1 | 0 | 0 | 1 | 0 | 0 | 1 |
| *Ceratonia* | 1 | 1 | 1 | 1 | 0 | 0 | 1 |
| *Cercis* | 0 | 1 | 1 | 0 | 0 | 0 | 1 |
| *Chamaerops* | 1 | 1 | 0 | 0 | 1 | 0 | 1 |
| *Corylus* | 1 | 0 | 0 | 1 | 0 | 0 | 1 |
| *Cotinus* | 0 | 1 | 0 | 0 | 1 | 0 | 1 |
| *Cotoneaster* | 0 | 1 | 1 | 0 | 0 | 0 | 1 |
| *Crataegus* | 0 | 1 | 1 | 0 | 0 | 0 | 1 |
| *Cupressus* | 1 | 0 | 0 | 1 | 0 | 1 | 0 |
| *Cytisus* | 0 | 1 | 1 | 0 | 0 | 0 | 1 |
| *Erica* | 0 | 1 | 1 | 0 | 0 | 1 | 0 |
| *Fagus* | 1 | 0 | 0 | 1 | 0 | 0 | 1 |
| *Ficus* | 0 | 1 | 0 | 0 | 1 | 0 | 1 |
| *Fontanesia* | 0 | 1 | 1 | 0 | 0 | 1 | 0 |
| *Frangula* | 0 | 1 | 1 | 0 | 0 | 0 | 1 |
| *Fraxinus* | 1 | 1 | 1 | 1 | 0 | 1 | 0 |
| *Genista* | 0 | 1 | 1 | 0 | 0 | 0 | 1 |
| *Ilex* | 0 | 1 | 1 | 0 | 0 | 0 | 1 |
| *Juglans* | 1 | 0 | 0 | 1 | 0 | 0 | 1 |
| *Juniperus* | 1 | 0 | 0 | 1 | 0 | 0 | 1 |
| *Laurus* | 0 | 1 | 0 | 0 | 1 | 0 | 1 |
| *Liquidambar* | 1 | 0 | 0 | 1 | 0 | 1 | 1 |
| *Lonicera* | 0 | 1 | 1 | 0 | 0 | 0 | 1 |
| *Malus* | 0 | 1 | 1 | 0 | 0 | 0 | 1 |
| *Myrica* | 1 | 0 | 1 | 0 | 0 | 0 | 1 |
| *Myrtus* | 0 | 1 | 1 | 0 | 0 | 0 | 1 |
| *Nerium* | 0 | 1 | 1 | 0 | 0 | 1 | 0 |
| *Olea* | 1 | 1 | 1 | 0 | 0 | 0 | 1 |
| *Ostrya* | 1 | 0 | 0 | 1 | 0 | 1 | 0 |
| *Phillyrea* | 1 | 1 | 1 | 0 | 0 | 0 | 1 |
| *Phoenix* | 1 | 1 | 0 | 0 | 1 | 0 | 1 |
| *Pinus* | 1 | 0 | 0 | 1 | 0 | 1 | 1 |
| *Pistacia* | 0 | 1 | 0 | 0 | 1 | 0 | 1 |
| *Platanus* | 1 | 0 | 0 | 1 | 0 | 1 | 1 |
| *Populus* | 1 | 0 | 0 | 0 | 1 | 1 | 0 |
| *Prunus* | 0 | 1 | 1 | 0 | 0 | 0 | 1 |
| *Pyrus* | 0 | 1 | 1 | 0 | 0 | 0 | 1 |
| *Quercus* | 1 | 0 | 0 | 1 | 0 | 0 | 1 |
| *Rhamnus* | 0 | 1 | 1 | 0 | 0 | 0 | 1 |
| *Rhododendron* | 0 | 1 | 1 | 0 | 0 | 1 | 0 |
| *Salix* | 1 | 1 | 0 | 0 | 1 | 1 | 0 |
| *Sambucus* | 0 | 1 | 1 | 0 | 0 | 0 | 1 |
| *Searsia* | 0 | 1 | 0 | 0 | 1 | 0 | 1 |
| *Sorbus* | 0 | 1 | 1 | 0 | 0 | 0 | 1 |
| *Spartium* | 0 | 1 | 1 | 0 | 0 | 0 | 1 |
| *Staphylea* | 0 | 1 | 1 | 0 | 0 | 1 | 1 |
| *Styrax* | 0 | 1 | 1 | 0 | 0 | 0 | 1 |
| *Tamarix* | 0 | 1 | 1 | 0 | 0 | 1 | 0 |
| *Taxus* | 1 | 0 | 0 | 0 | 1 | 0 | 1 |
| *Tetraclinis* | 1 | 0 | 0 | 1 | 0 | 1 | 0 |
| *Tilia* | 0 | 1 | 1 | 0 | 0 | 1 | 0 |
| *Ulmus* | 1 | 0 | 0 | 1 | 0 | 1 | 0 |
| *Vitex* | 0 | 1 | 1 | 0 | 0 | 0 | 1 |
| *Zelkova* | 1 | 0 | 0 | 1 | 0 | 1 | 0 |

- Pollination type, two classes: either abiotic (e.g. wind) or biotic (animal pollen dispersal).

- Breeding system, three classes: hermaphroditic (Mating Herm), unisexual-monoecious (Mating Unisex Mono) where male and female flower are separate but on the same tree, and unisexual-dioecious (Mating Unisex Dio ).

- Seed dispersal mode, two classes: either abiotic (Disp Abiotic) or biotic (Disp Animal).

**Appendix S6.** Categorical IUCN vulnerability status for the 64 Mediterranean Europe tree genera. The definitions of the status classes can be found in the text and at: <https://www.iucnredlist.org/>. The table counts the number of Mediterranean Europe tree species found in each vulnerability category, for each genus.

| Genus | Data deficient | Near threatened | Vulnerable | Endangered | Critically endangered | Least concern |
| --- | --- | --- | --- | --- | --- | --- |
| *Abies* | 0 | 0 | 0 | 1 | 1 | 2 |
| *Acer* | 0 | 0 | 0 | 0 | 0 | 11 |
| *Aesculus* | 0 | 0 | 1 | 0 | 0 | 0 |
| *Alnus* | 1 | 0 | 0 | 0 | 0 | 4 |
| *Arbutus* | 0 | 0 | 0 | 0 | 0 | 2 |
| *Betula* | 0 | 0 | 0 | 0 | 1 | 1 |
| *Buxus* | 0 | 0 | 0 | 0 | 0 | 1 |
| *Carpinus* | 0 | 0 | 0 | 0 | 0 | 2 |
| *Castanea* | 0 | 0 | 0 | 0 | 0 | 1 |
| *Cedrus* | 0 | 0 | 1 | 0 | 0 | 0 |
| *Celtis* | 1 | 0 | 0 | 0 | 0 | 1 |
| *Ceratonia* | 0 | 0 | 0 | 0 | 0 | 1 |
| *Cercis* | 0 | 0 | 0 | 0 | 0 | 1 |
| *Chamaerops* | 0 | 0 | 0 | 0 | 0 | 1 |
| *Corylus* | 0 | 0 | 0 | 0 | 0 | 2 |
| *Cotinus* | 0 | 0 | 0 | 0 | 0 | 1 |
| *Cotoneaster* | 0 | 0 | 0 | 0 | 0 | 0 |
| *Crataegus* | 1 | 1 | 0 | 0 | 0 | 5 |
| *Cupressus* | 0 | 0 | 0 | 0 | 0 | 1 |
| *Cytisus* | 0 | 0 | 0 | 1 | 0 | 0 |
| *Erica* | 0 | 0 | 0 | 0 | 0 | 1 |
| *Fagus* | 0 | 0 | 0 | 0 | 0 | 2 |
| *Ficus* | 0 | 0 | 0 | 0 | 0 | 1 |
| *Fontanesia* | 0 | 0 | 0 | 0 | 0 | 0 |
| *Frangula* | 0 | 0 | 0 | 0 | 0 | 1 |
| *Fraxinus* | 1 | 1 | 0 | 0 | 0 | 2 |
| *Genista* | 0 | 0 | 0 | 0 | 0 | 1 |
| *Ilex* | 0 | 0 | 0 | 0 | 0 | 1 |
| *Juglans* | 0 | 0 | 0 | 0 | 0 | 1 |
| *Juniperus* | 0 | 1 | 0 | 1 | 0 | 6 |
| *Laurus* | 0 | 0 | 0 | 0 | 0 | 1 |
| *Liquidambar* | 0 | 0 | 0 | 1 | 1 | 0 |
| *Lonicera* | 0 | 0 | 0 | 0 | 0 | 1 |
| *Malus* | 3 | 1 | 0 | 0 | 0 | 1 |
| *Myrica* | 0 | 0 | 0 | 0 | 0 | 1 |
| *Myrtus* | 0 | 0 | 0 | 0 | 0 | 1 |
| *Nerium* | 0 | 0 | 0 | 0 | 0 | 1 |
| *Olea* | 1 | 0 | 0 | 0 | 0 | 0 |
| *Ostrya* | 0 | 0 | 0 | 0 | 0 | 1 |
| *Phillyrea* | 0 | 0 | 0 | 0 | 0 | 1 |
| *Phoenix* | 0 | 1 | 0 | 0 | 0 | 0 |
| *Pinus* | 0 | 0 | 0 | 0 | 0 | 8 |
| *Pistacia* | 0 | 1 | 0 | 0 | 0 | 3 |
| *Platanus* | 1 | 0 | 1 | 0 | 0 | 0 |
| *Populus* | 1 | 0 | 0 | 0 | 0 | 2 |
| *Prunus* | 4 | 0 | 1 | 0 | 0 | 3 |
| *Pyrus* | 3 | 0 | 0 | 0 | 0 | 3 |
| *Quercus* | 3 | 2 | 0 | 0 | 0 | 18 |
| *Rhamnus* | 0 | 0 | 0 | 1 | 0 | 2 |
| *Rhododendron* | 0 | 0 | 0 | 0 | 0 | 0 |
| *Salix* | 0 | 1 | 1 | 0 | 0 | 15 |
| *Sambucus* | 0 | 0 | 0 | 0 | 0 | 2 |
| *Searsia* | 0 | 0 | 1 | 0 | 0 | 0 |
| *Sorbus* | 0 | 1 | 2 | 0 | 0 | 8 |
| *Spartium* | 0 | 0 | 0 | 0 | 0 | 0 |
| *Staphylea* | 0 | 0 | 0 | 0 | 0 | 1 |
| *Styrax* | 0 | 0 | 0 | 0 | 0 | 1 |
| *Tamarix* | 1 | 0 | 1 | 0 | 0 | 10 |
| *Taxus* | 0 | 0 | 0 | 0 | 0 | 1 |
| *Tetraclinis* | 0 | 0 | 0 | 1 | 0 | 0 |
| *Tilia* | 0 | 0 | 0 | 0 | 0 | 3 |
| *Ulmus* | 4 | 0 | 1 | 0 | 0 | 0 |
| *Vitex* | 1 | 0 | 0 | 0 | 0 | 0 |
| *Zelkova* | 0 | 0 | 0 | 1 | 1 | 0 |

Appendix S7. Phylogram obtained from Bayesian inference analysis of the matK, rbcL and trnH-psbA sequence data of the 64 tree genera of Mediterranean Europe. Numbers indicate posterior probability support for each node when > 0.90. Red lines indicate discrepancies with the APG IV phylogeny.

**
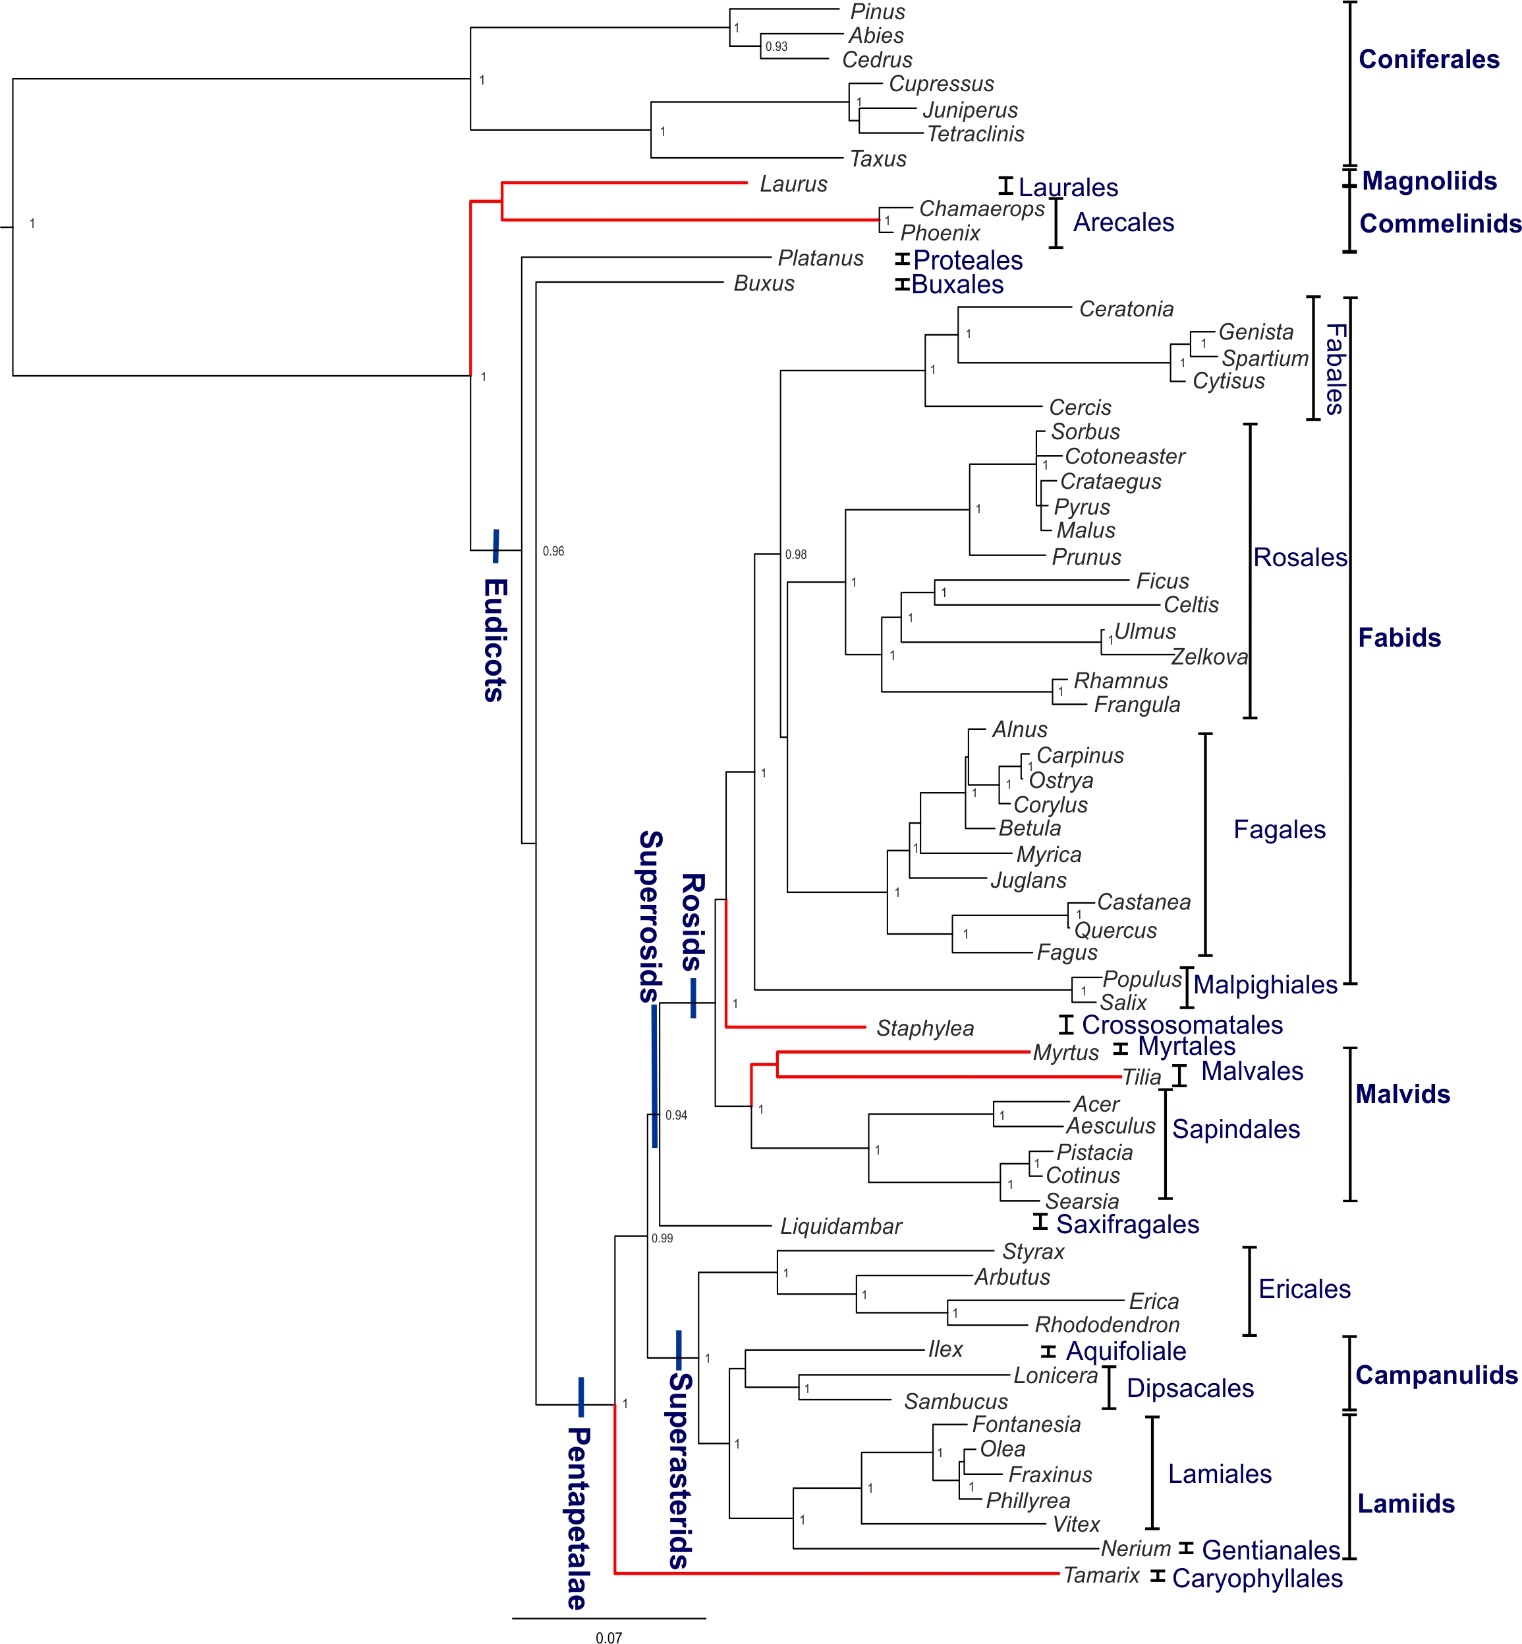
**

**Appendix S8.** Non-dated Maximum Likelihood phylogenetic tree of 64 woody plant genera of Mediterranean Europe. Numbers indicate bootstrap support for each node. Orange lines indicate discrepancy or incongruence with the APG IV phylogeny**.**


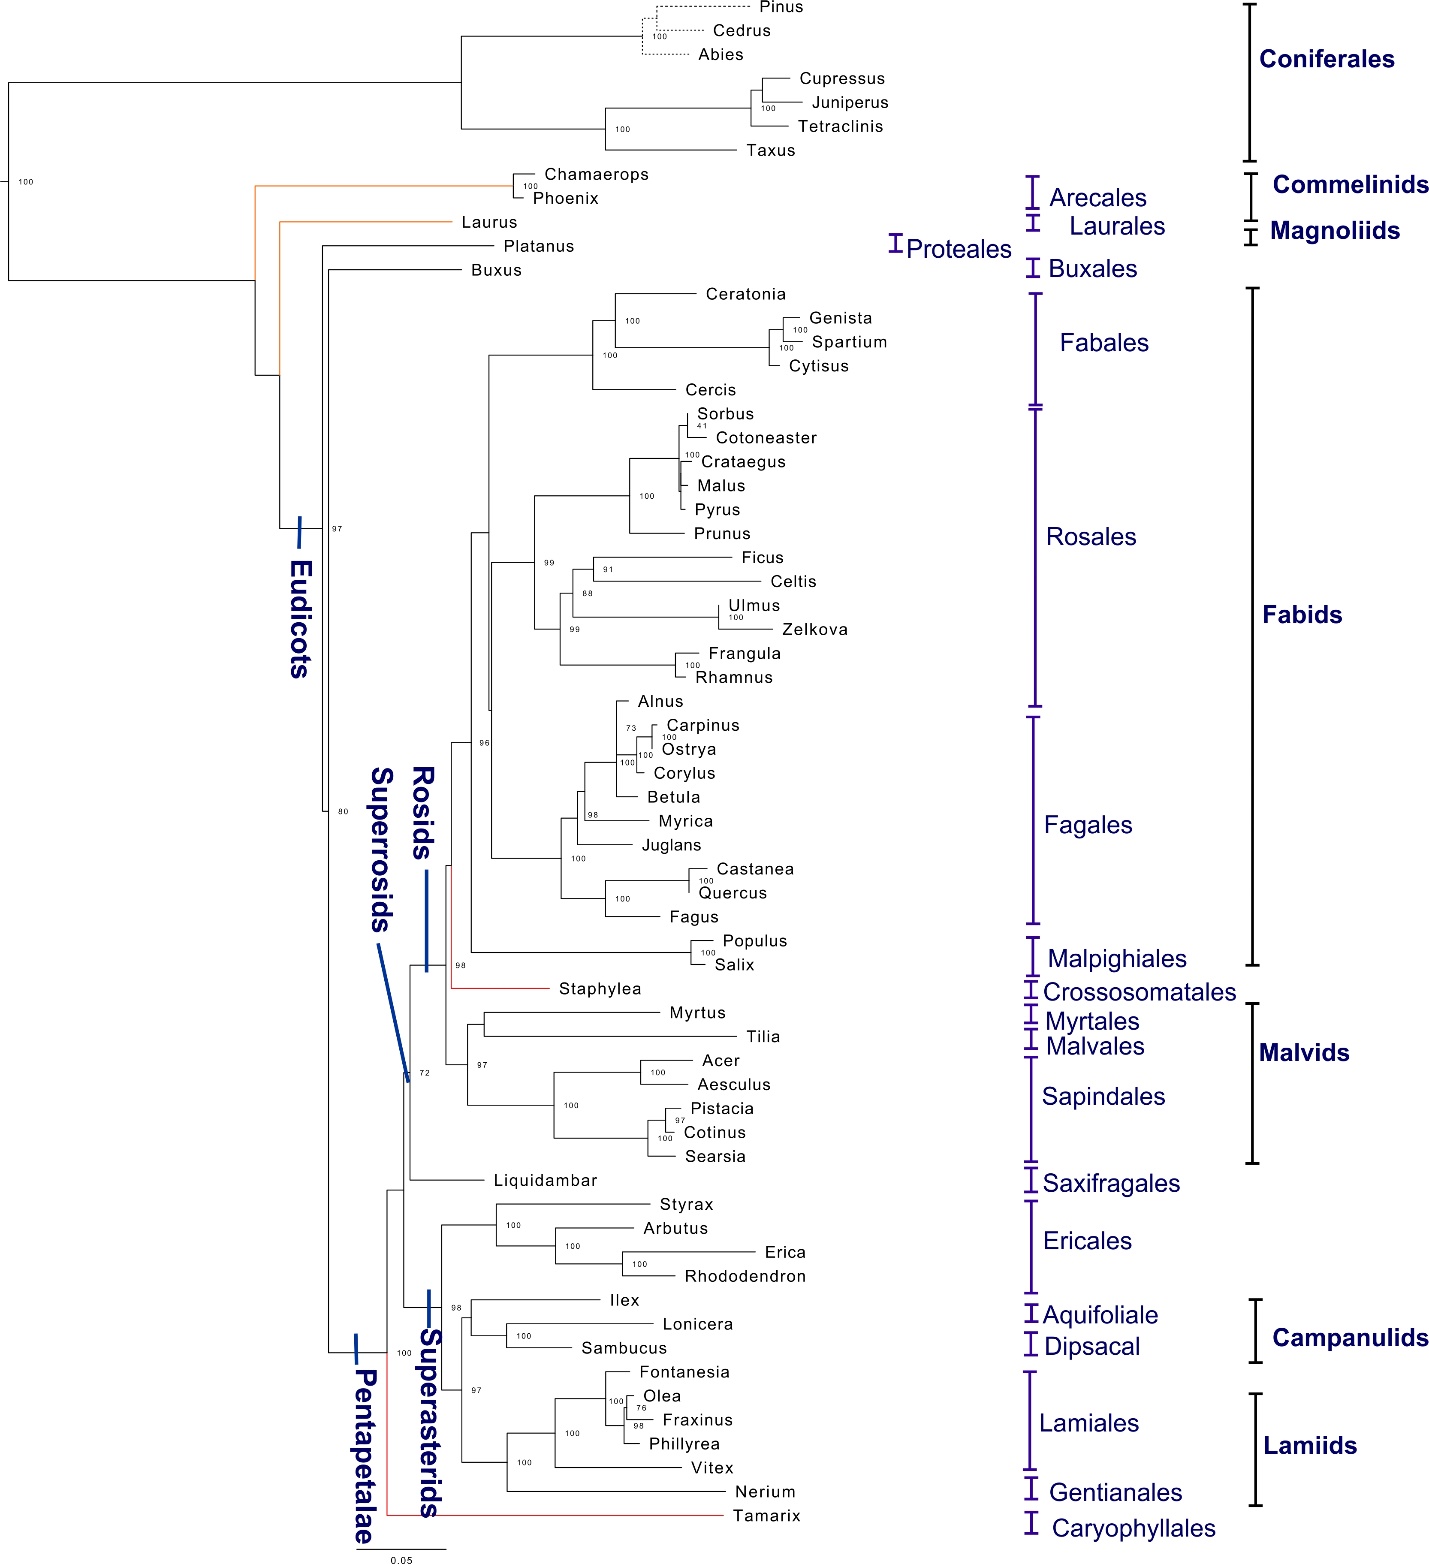


**Appendix S9.** Differences in statistical support for nodes between the Maximum Likelihood and Bayesian approaches.

| Nodes | Bayesian approach  (posterior probability support) | Maximum likelihood approach (Bootstrap) |
| --- | --- | --- |
| *Liquidambar*/Rosids | 1 | 72 |
| Superrosides/Superasterides | 1 | 70 |
| *Myrtus*/*Tilia* | 0.97 | 70 |
| *Laurus*/Eudicots | 1 | 70 |
| Fabales/Rosales/Fagales | 1 | <70 |

**Appendix S10.** Divergence age estimates. Node labels are the ones of Fig. 1.

| Node label | Estimated Age nodes (Ma) | 95% highest posterior density age (HPD) estimates |
| --- | --- | --- |
| 1 | 132.19 | 128.56-137.63 |
| 2 | 201.14 | 198.40-206.45 |
| 3 | 21.61 | 0.77-58.96 |
| 4 | 72.3 | 70.00-76.37 |
| 5 | 45.43 | 44.00-48.10 |
| 6 | 67.46 | 66.00-69.99 |
| 7 | 16.99 | 1.78-27.52 |
| 8 | 11.35 | 0.66-15.10 |
| 9 | 12.9 | 0.84-29.32 |
| 10 | 34.37 | 5.46-69.55 |
| 11 | 124.18 | 121-133.09 |
| 12 | 92.82 | 86.16-99.2 |
| 13 | 83.25 | 82.00-84.99 |
| 14 | 30.95 | 11.18-47.70 |
| 15 | 11.19 | 1.18-29.56 |
| 16 | 12.91 | 0.86-30.43 |
| 17 | 6.97 | 1.05-17.90 |
| 18 | 1.67 | 0.03-3.86 |
| 19 | 29.52 | 2.13-37.07 |
| 20 | 76.46 | 75.00-78.84 |
| 21 | 38.25 | 5.10-58.53 |
| 22 | 5.99 | 0.08-17.03 |
| 23 | 37.13 | 35.50-39.96 |
| 24 | 46 | 48.60-52.13 |
| 25 | 9.21 | 0.07-26.47 |
| 26 | 22.45 | 2.81-42.74 |
| 27 | 107.99 | 102.90-114.03 |
| 28 | 84.48 | 83.00-86.79 |
| 29 | 113.68 | 105.13-126.87 |
| 30 | 21.51 | 4.41-39.60 |
| 31 | 46.16 | 44.40-49.51 |
| 32 | 21.51 | 4.14-39.60 |

**Appendix S11.** Results of the tests of phylogenetic signal for the IUCN conservation status using Fritz and Purvis’ (2010) D statistic.

The graph in blue is the distribution of D values assuming a Brownian Motion (BM) model, and the blue vertical line indicates D=0 (when the phylogenetic distribution of a parameter is no different from BM). The graph in red is the distribution of D values assuming a random model, and the red vertical line indicates D=1 (when the phylogenetic distribution of a parameter is no different from random). The bold black vertical lines indicate the observed D values. The number of * is indicative of the significance level of the observed D values
